# Supplementary material for: Identification of key regulatory genes connected to NF-κB family of proteins in visceral adipose tissues using gene expression and weighted protein interaction network
Source: PubMed Central journal article supplement (PMC6478283; doi:10.1371/journal.pone.0214337), 2019-04-23
Supplement: pone.0214337.s002.pdf [file pone.0214337.s002.pdf]

**S2 Table.** Details of the NF- $\kappa$ B family of proteins

| <b>Gene Symbol</b> | <b>Gene Name</b>                            |
|--------------------|---------------------------------------------|
| NFKB1              | Nuclear factor kappa B subunit 1            |
| NFKB2              | Nuclear factor kappa B subunit 2            |
| REL                | REL proto-oncogene, NF- $\kappa$ B subunit  |
| RELA               | RELA proto-oncogene, NF- $\kappa$ B subunit |
| RELB               | RELB proto-oncogene, NF- $\kappa$ B subunit |
