# Supplementary material for: Identification of key regulatory genes connected to NF-κB family of proteins in visceral adipose tissues using gene expression and weighted protein interaction network
Source: PubMed Central journal article supplement (PMC6478283; doi:10.1371/journal.pone.0214337), 2019-04-23
Supplement: pone.0214337.s004.pdf [file pone.0214337.s004.pdf]

**S4 Table:** List of inflammatory inducers of NF- $\kappa$ B proteins

---

| <b>Symbol</b> | <b>Name</b>                                                             |
|---------------|-------------------------------------------------------------------------|
| TNFRSF8       | TNF receptor superfamily member 8                                       |
| CST1          | Cystatin SN                                                             |
| CST2          | Cystatin SA                                                             |
| EPHX2         | Epoxide hydrolase 2                                                     |
| IL1A          | Interleukin 1 alpha                                                     |
| IL1B          | Interleukin 1 beta                                                      |
| IL2           | Interleukin 2                                                           |
| IL4           | Interleukin 4                                                           |
| IL12A         | Interleukin 12A                                                         |
| IL12B         | Interleukin 12B                                                         |
| IL15          | Interleukin 15                                                          |
| IL17A         | Interleukin 17A                                                         |
| IL18          | Interleukin 18                                                          |
| LIF           | LIF, interleukin 6 family cytokine                                      |
| LTA           | Lymphotoxin alpha                                                       |
| PTX3          | Pentraxin 3                                                             |
| S100B         | S100 calcium binding protein B                                          |
| THPO          | Thrombopoietin                                                          |
| TNF           | Tumor necrosis factor                                                   |
| TNFSF14       | TNF superfamily member 14                                               |
| TNFSF12       | TNF superfamily member 12                                               |
| IL32          | Interleukin 32                                                          |
| AIMP1         | Aminoacyl tRNA synthetase complex interacting multifunctional protein 1 |
| TANK          | TRAF family member associated NF $\kappa$ B activator                   |
| NAMPT         | Nicotinamide phosphoribosyltransferase                                  |
| IL17B         | Interleukin 17B                                                         |
| IL21          | Interleukin 21                                                          |
| IL33          | Interleukin 33                                                          |

---
