# Supplementary material for: Identification of key regulatory genes connected to NF-κB family of proteins in visceral adipose tissues using gene expression and weighted protein interaction network
Source: PubMed Central journal article supplement (PMC6478283; doi:10.1371/journal.pone.0214337), 2019-04-23
Supplement: pone.0214337.s005.pdf [file pone.0214337.s005.pdf]

S5 Table: DPCC for Normal vs Obese Genes

| Gene-1  | Gene-2   | Normal      | Obese       | $D_{PCC}$   | $D_{PCC}$ (ABS) |
|---------|----------|-------------|-------------|-------------|-----------------|
| TRIAP1  | MAN2B2   | -0.84490234 | 0.79061824  | 1.63552058  | 1.63552058      |
| DCAF8   | NFATC2IP | -0.8199923  | 0.7862996   | 1.6062919   | 1.6062919       |
| P4HA1   | PFDN4    | 0.8007077   | -0.79464555 | -1.59535325 | 1.59535325      |
| XRCC5   | EPHX2    | -0.7465685  | 0.79317296  | 1.53974146  | 1.53974146      |
| PCNA    | RUFY3    | -0.74981827 | 0.7793764   | 1.52919467  | 1.52919467      |
| PSMB2   | SPG20    | -0.7259946  | 0.8019689   | 1.5279635   | 1.5279635       |
| LRP8    | THBS3    | -0.8037855  | 0.71571183  | 1.51949733  | 1.51949733      |
| MCM3    | TOP2A    | 0.7113794   | -0.7908391  | -1.5022185  | 1.5022185       |
| SP3     | RCC2     | -0.7283448  | 0.7502496   | 1.4785944   | 1.4785944       |
| CCT3    | MAN2B2   | -0.75529975 | 0.708207    | 1.46350675  | 1.46350675      |
| HSPA1L  | HSPA1A   | -0.7127358  | 0.7443941   | 1.4571299   | 1.4571299       |
| MFAP3   | EPHX2    | -0.678268   | 0.77611774  | 1.45438574  | 1.45438574      |
| DKC1    | SP3      | -0.6472255  | 0.80593705  | 1.45316255  | 1.45316255      |
| MFAP3   | BRAP     | -0.7850248  | 0.66768545  | 1.45271025  | 1.45271025      |
| XRCC5   | RBM17    | -0.6855559  | 0.765678    | 1.4512339   | 1.4512339       |
| TUSC3   | ABCA1    | -0.7636935  | 0.68653065  | 1.45022415  | 1.45022415      |
| STAT3   | FOS      | 0.7200754   | -0.7234661  | -1.4435415  | 1.4435415       |
| HPS6    | ETNPPL   | 0.8087067   | -0.63480866 | -1.44351536 | 1.44351536      |
| STX8    | MRPL47   | -0.7576042  | 0.68233097  | 1.43993517  | 1.43993517      |
| CDK1    | B3GNT2   | 0.7389807   | -0.69810575 | -1.43708645 | 1.43708645      |
| HIVEP3  | QSOX1    | 0.7733365   | -0.66007346 | -1.43340996 | 1.43340996      |
| THBS3   | SVEP1    | 0.8463368   | -0.5855048  | -1.4318416  | 1.4318416       |
| CD47    | CTNNA1   | -0.8061776  | 0.62431586  | 1.43049346  | 1.43049346      |
| ZNF384  | ZNF704   | 0.79648143  | -0.6303119  | -1.42679333 | 1.42679333      |
| EPS15   | MRPS22   | -0.63913375 | 0.7862456   | 1.42537935  | 1.42537935      |
| TEX10   | PELP1    | 0.7758664   | -0.6404441  | -1.4163105  | 1.4163105       |
| XRCC5   | RUFY3    | -0.67382026 | 0.74105644  | 1.4148767   | 1.4148767       |
| NEDD4L  | PRICKLE1 | 0.7761754   | -0.6375003  | -1.4136757  | 1.4136757       |
| MCM3    | HLA-C    | -0.60021347 | 0.81271887  | 1.41293234  | 1.41293234      |
| MRPL17  | POC1A    | 0.8826445   | -0.52615    | -1.4087945  | 1.4087945       |
| AGPAT5  | MAN2B2   | -0.6860501  | 0.7226621   | 1.4087122   | 1.4087122       |
| ATP1A2  | SOX4     | 0.7191575   | -0.6887498  | -1.4079073  | 1.4079073       |
| PI3     | PDIA4    | 0.6507124   | -0.7532877  | -1.4040001  | 1.4040001       |
| PI3     | ADAMTS9  | 0.6032839   | -0.7922514  | -1.3955353  | 1.3955353       |
| KARS    | RMDN1    | -0.71330583 | 0.68134165  | 1.39464748  | 1.39464748      |
| SOX4    | SFRP1    | 0.8183535   | -0.5759782  | -1.3943317  | 1.3943317       |
| EPHX2   | PSMB3    | -0.8338243  | 0.5598863   | 1.3937106   | 1.3937106       |
| ESRRG   | TBC1D9B  | -0.80233085 | 0.58972096  | 1.39205181  | 1.39205181      |
| COL4A1  | FZR1     | 0.7556257   | -0.6345547  | -1.3901804  | 1.3901804       |
| EFCAB14 | LPCAT1   | -0.59437317 | 0.79569143  | 1.3900646   | 1.3900646       |
| NDN     | SOX4     | 0.7040219   | -0.68534976 | -1.38937166 | 1.38937166      |
| EPHA1   | MRPS22   | 0.6473207   | -0.74086857 | -1.38818927 | 1.38818927      |
| KIRREL  | LCMT2    | -0.6944882  | 0.69140863  | 1.38589683  | 1.38589683      |
| TOP2A   | BIK      | 0.8647102   | -0.52093965 | -1.38564985 | 1.38564985      |
| SP3     | DNMT1    | -0.56702673 | 0.817593    | 1.38461973  | 1.38461973      |
| EFCAB14 | WDR46    | -0.59951544 | 0.78226036  | 1.3817758   | 1.3817758       |
| ESRRG   | RPRD1A   | -0.6117029  | 0.7674302   | 1.3791331   | 1.3791331       |
| CSTF3   | HLA-G    | -0.59477663 | 0.783978    | 1.37875463  | 1.37875463      |
| EPS15   | RACGAP1  | -0.6537358  | 0.72451884  | 1.37825464  | 1.37825464      |
| COCH    | PPP1R1B  | 0.6980992   | -0.68010455 | -1.37820375 | 1.37820375      |
| CTNNA1  | TPBG     | -0.77409065 | 0.60245144  | 1.37654209  | 1.37654209      |
| GTF2I   | GALNT2   | -0.7416724  | 0.6347024   | 1.3763748   | 1.3763748       |
| NEGR1   | DDX28    | 0.73135704  | -0.6444404  | -1.37579744 | 1.37579744      |

|          |          |             |             |             |            |
|----------|----------|-------------|-------------|-------------|------------|
| ZNF608   | C1orf131 | -0.46701208 | 0.9074724   | 1.37448448  | 1.37448448 |
| HLF      | PRICKLE1 | 0.76242656  | -0.61179984 | -1.3742264  | 1.3742264  |
| SERPINA1 | COL5A1   | -0.50202477 | 0.8716276   | 1.37365237  | 1.37365237 |
| SCML2    | PER2     | -0.7892402  | 0.5836983   | 1.3729385   | 1.3729385  |
| TMEM223  | HLA-C    | -0.7572834  | 0.61365175  | 1.37093515  | 1.37093515 |
| EIF4G3   | KPNA4    | 0.74106145  | -0.62982756 | -1.37088901 | 1.37088901 |
| KALRN    | NUDCD2   | -0.73665214 | 0.6327213   | 1.36937344  | 1.36937344 |
| CCT3     | KCNRG    | 0.6988981   | -0.67004406 | -1.36894216 | 1.36894216 |
| FHOD1    | EXOSC8   | -0.6887996  | 0.67712444  | 1.36592404  | 1.36592404 |
| MLH1     | PDE7A    | 0.75778586  | -0.6068467  | -1.36463256 | 1.36463256 |
| POLN     | CEP112   | -0.7310638  | 0.6333874   | 1.3644512   | 1.3644512  |
| RAB35    | COG6     | 0.640026    | -0.7240482  | -1.3640742  | 1.3640742  |
| QSOX1    | TOB2     | 0.77924407  | -0.5846613  | -1.36390537 | 1.36390537 |
| FIP1L1   | XXYL1    | -0.7358085  | 0.6272164   | 1.3630249   | 1.3630249  |
| TRIT1    | MFAP3    | -0.5800675  | 0.78246534  | 1.36253284  | 1.36253284 |
| PTTG1IP  | TOP3A    | -0.7134585  | 0.6479284   | 1.3613869   | 1.3613869  |
| PDE4DIP  | DPAGT1   | -0.6922102  | 0.6686902   | 1.3609004   | 1.3609004  |
| NOL9     | ASB1     | -0.55212194 | 0.8078885   | 1.36001044  | 1.36001044 |
| TRIM27   | ABCA1    | -0.64169246 | 0.7181909   | 1.35988336  | 1.35988336 |
| ADRA1B   | LAP3     | 0.5426458   | -0.81597626 | -1.35862206 | 1.35862206 |
| MCM6     | KALRN    | -0.61027664 | 0.74819267  | 1.35846931  | 1.35846931 |
| PDZD2    | STX6     | -0.61206543 | 0.74599236  | 1.35805779  | 1.35805779 |
| HDAC1    | RBM17    | -0.6978421  | 0.6587166   | 1.3565587   | 1.3565587  |
| WDTC1    | SLC25A22 | -0.76698816 | 0.58927554  | 1.3562637   | 1.3562637  |
| CNNM2    | BST2     | 0.82219315  | -0.5334293  | -1.35562245 | 1.35562245 |
| KIRREL   | NIPA2    | -0.63683945 | 0.71779954  | 1.35463899  | 1.35463899 |
| MCM3     | ZBTB10   | -0.60310096 | 0.7494847   | 1.35258566  | 1.35258566 |
| LMO3     | SOX4     | 0.6061915   | -0.7387266  | -1.3449181  | 1.3449181  |
| OPRK1    | GPR34    | -0.69782233 | 0.6470283   | 1.34485063  | 1.34485063 |
| ESRRG    | ALAD     | -0.52817047 | 0.81636673  | 1.3445372   | 1.3445372  |
| LRP8     | BMP1     | -0.5808839  | 0.76257086  | 1.34345476  | 1.34345476 |
| LCMT2    | PCMTD1   | -0.5500099  | 0.79282504  | 1.34283494  | 1.34283494 |
| EZH2     | CDK1     | 0.89854753  | -0.4441706  | -1.34271813 | 1.34271813 |
| MCM3     | RBM17    | -0.6941539  | 0.64797425  | 1.34212815  | 1.34212815 |
| NEGR1    | MSRB3    | -0.8506514  | 0.4910484   | 1.3416998   | 1.3416998  |
| MMP14    | CADM1    | 0.76475376  | -0.57371956 | -1.33847332 | 1.33847332 |
| NOVA1    | ATP5G1   | -0.8101079  | 0.5280324   | 1.3381403   | 1.3381403  |
| SOX4     | DTL      | -0.5858822  | 0.7506319   | 1.3365141   | 1.3365141  |
| RDH11    | PFDN4    | 0.7590253   | -0.5772304  | -1.3362557  | 1.3362557  |
| PARK2    | FTL      | -0.56185335 | 0.77378285  | 1.3356362   | 1.3356362  |
| MSR1     | CCNI     | 0.5157306   | -0.81955284 | -1.33528344 | 1.33528344 |
| CSTF3    | NEGR1    | 0.63993984  | -0.6943373  | -1.33427714 | 1.33427714 |
| ITSN1    | ESRRG    | -0.66610426 | 0.66731447  | 1.33341873  | 1.33341873 |
| CDC7     | CDK10    | -0.71748704 | 0.61478335  | 1.33227039  | 1.33227039 |
| QKI      | C1orf131 | -0.58601725 | 0.74562836  | 1.33164561  | 1.33164561 |
| THRB     | MFAP3    | -0.5918367  | 0.73952407  | 1.33136077  | 1.33136077 |
| NFE2L1   | DPAGT1   | -0.7248667  | 0.6051535   | 1.3300202   | 1.3300202  |
| PDE4DIP  | SLIRP    | -0.5743951  | 0.7516256   | 1.3260207   | 1.3260207  |
| RRBP1    | FOS      | 0.73889977  | -0.5868063  | -1.32570607 | 1.32570607 |
| KARS     | OSR2     | -0.7589206  | 0.56658095  | 1.32550155  | 1.32550155 |
| RBM17    | PHF5A    | -0.6138776  | 0.71145266  | 1.32533026  | 1.32533026 |
| FOXN3    | MRPL47   | -0.72816193 | 0.59584767  | 1.3240096   | 1.3240096  |
| CCND2    | PPP2R4   | 0.78921294  | -0.5342362  | -1.32344914 | 1.32344914 |
| EIF4G3   | MGEA5    | -0.56705284 | 0.75601536  | 1.3230682   | 1.3230682  |
| ARHGEF12 | UBE2B    | -0.610231   | 0.7122044   | 1.3224354   | 1.3224354  |

|          |          |             |             |             |            |
|----------|----------|-------------|-------------|-------------|------------|
| SAP18    | SIRPA    | 0.9085426   | -0.41319418 | -1.32173678 | 1.32173678 |
| ZNF608   | PNPT1    | -0.53114    | 0.79026884  | 1.32140884  | 1.32140884 |
| BRD8     | TM4SF18  | -0.45721927 | 0.86286503  | 1.3200843   | 1.3200843  |
| EIF4E3   | CERS5    | 0.8238425   | -0.4959678  | -1.3198103  | 1.3198103  |
| IDS      | AGPAT5   | -0.53074205 | 0.7887671   | 1.31950915  | 1.31950915 |
| SPCS3    | CCDC90B  | -0.5817221  | 0.7374461   | 1.3191682   | 1.3191682  |
| ARHGEF2  | RCC2     | -0.88251185 | 0.43579084  | 1.31830269  | 1.31830269 |
| PCNA     | ZBTB10   | -0.6408693  | 0.67680013  | 1.31766943  | 1.31766943 |
| GALNT2   | ADGRA2   | -0.5844702  | 0.7323404   | 1.3168106   | 1.3168106  |
| MFAP3    | PDZRN3   | -0.5995868  | 0.7171017   | 1.3166885   | 1.3166885  |
| HDGF     | COL5A1   | -0.71222186 | 0.60277355  | 1.31499541  | 1.31499541 |
| CADM1    | KIAA1715 | -0.68141055 | 0.63299024  | 1.31440079  | 1.31440079 |
| TOP2A    | PNPT1    | 0.65077364  | -0.6601712  | -1.31094484 | 1.31094484 |
| MCM3     | TM4SF18  | -0.47840026 | 0.8325208   | 1.31092106  | 1.31092106 |
| CUX1     | CTNNA1   | -0.80673116 | 0.5041051   | 1.31083626  | 1.31083626 |
| INO80D   | DLC1     | -0.7321852  | 0.57778245  | 1.30996765  | 1.30996765 |
| GTF2I    | STX6     | -0.7897     | 0.52001107  | 1.30971107  | 1.30971107 |
| EPHA1    | KIAA0391 | 0.57188904  | -0.73669785 | -1.30858689 | 1.30858689 |
| MAP4K4   | ZFP36    | 0.6681097   | -0.64027995 | -1.30838965 | 1.30838965 |
| DNAJC15  | CDKN3    | -0.89037764 | 0.4160168   | 1.30639444  | 1.30639444 |
| PCNA     | TOP2A    | 0.816714    | -0.48899704 | -1.30571104 | 1.30571104 |
| SGCB     | MRPS22   | -0.62789446 | 0.67756397  | 1.30545843  | 1.30545843 |
| CDK10    | RELA     | -0.627355   | 0.67696977  | 1.30432477  | 1.30432477 |
| ESRRG    | MRPL19   | -0.58941305 | 0.7143872   | 1.30380025  | 1.30380025 |
| NEDD4L   | IL17RA   | -0.6791939  | 0.62367463  | 1.30286853  | 1.30286853 |
| B2M      | DHX30    | -0.6630218  | 0.63950795  | 1.30252975  | 1.30252975 |
| LDLRAD4  | CNOT11   | -0.6005252  | 0.7011989   | 1.3017241   | 1.3017241  |
| SNRPB2   | RBM17    | -0.53370345 | 0.76769567  | 1.30139912  | 1.30139912 |
| CTNNA1   | PCDHB5   | -0.6348016  | 0.6657191   | 1.3005207   | 1.3005207  |
| MCM3     | RGS5     | -0.76207066 | 0.5379213   | 1.29999196  | 1.29999196 |
| PTGER3   | COL1A1   | 0.6447596   | -0.6545425  | -1.2993021  | 1.2993021  |
| COL15A1  | CECR5    | -0.5350179  | 0.7624805   | 1.2974984   | 1.2974984  |
| KIF11    | SOBP     | -0.82528615 | 0.47181284  | 1.29709899  | 1.29709899 |
| ELF4     | SAMD4A   | 0.7990669   | -0.49798268 | -1.29704958 | 1.29704958 |
| CPNE3    | SOX4     | 0.6887324   | -0.60812926 | -1.29686166 | 1.29686166 |
| NAALADL2 | GGCT     | -0.6228409  | 0.67354214  | 1.29638304  | 1.29638304 |
| TUSC3    | MTMR4    | -0.41833493 | 0.87791765  | 1.29625258  | 1.29625258 |
| RACGAP1  | KCNRG    | 0.6094859   | -0.68615985 | -1.29564575 | 1.29564575 |
| VPS16    | MFSD12   | -0.49231207 | 0.8033327   | 1.29564477  | 1.29564477 |
| SPAG16   | CNOT11   | -0.6496571  | 0.6456986   | 1.2953557   | 1.2953557  |
| ADAM22   | ARHGEF37 | 0.7522212   | -0.5429671  | -1.2951883  | 1.2951883  |
| COPZ1    | EPHX2    | -0.48643735 | 0.8078363   | 1.29427365  | 1.29427365 |
| CDK6     | IL1A     | -0.6573744  | 0.635505    | 1.2928794   | 1.2928794  |
| ESRRG    | PARVA    | -0.6211608  | 0.67109597  | 1.29225677  | 1.29225677 |
| EIF4G3   | ARPP19   | 0.7480565   | -0.5440928  | -1.2921493  | 1.2921493  |
| IPO11    | ABCA1    | -0.6168594  | 0.6731664   | 1.2900258   | 1.2900258  |
| ANKRD28  | LCLAT1   | -0.5706625  | 0.71929157  | 1.28995407  | 1.28995407 |
| COL3A1   | PHF8     | -0.49609336 | 0.793753    | 1.28984636  | 1.28984636 |
| CRYZL1   | TP53I3   | 0.6626646   | -0.6270307  | -1.2896953  | 1.2896953  |
| NVL      | COL6A3   | -0.61434007 | 0.67510545  | 1.28944552  | 1.28944552 |
| PDZRN3   | DPAGT1   | -0.7556063  | 0.53298956  | 1.28859586  | 1.28859586 |
| GNAQ     | CNOT11   | -0.55279833 | 0.73550224  | 1.28830057  | 1.28830057 |
| SAP18    | TNFRSF25 | 0.69594306  | -0.59230566 | -1.28824872 | 1.28824872 |
| CDCA7    | KALRN    | -0.55688703 | 0.73099923  | 1.28788626  | 1.28788626 |
| TNFAIP2  | HGF      | 0.71663713  | -0.5712255  | -1.28786263 | 1.28786263 |

|         |          |             |             |             |            |
|---------|----------|-------------|-------------|-------------|------------|
| ESRRG   | PDE4DIP  | -0.63184583 | 0.65505725  | 1.28690308  | 1.28690308 |
| QKI     | CNOT11   | -0.55218977 | 0.73432446  | 1.28651423  | 1.28651423 |
| HDAC11  | DKC1     | -0.7272024  | 0.55897725  | 1.28617965  | 1.28617965 |
| SMYD3   | MDN1     | -0.7415718  | 0.5442571   | 1.2858289   | 1.2858289  |
| MCM3    | THRB     | -0.71150345 | 0.5740923   | 1.28559575  | 1.28559575 |
| TRIAP1  | SH3RF1   | -0.48181644 | 0.80352235  | 1.28533879  | 1.28533879 |
| LAMA4   | POLDIP3  | -0.68610704 | 0.59920406  | 1.2853111   | 1.2853111  |
| SOX4    | BMPER    | 0.49909237  | -0.78522354 | -1.28431591 | 1.28431591 |
| STAT5B  | SOX4     | 0.54572093  | -0.73821187 | -1.2839328  | 1.2839328  |
| SRD5A1  | ADAMTS2  | -0.510949   | 0.7729102   | 1.2838592   | 1.2838592  |
| KALRN   | TMEM97   | -0.6447231  | 0.6385976   | 1.2833207   | 1.2833207  |
| COL9A1  | MEST     | 0.774731    | -0.5073037  | -1.2820347  | 1.2820347  |
| CDK10   | TEAD4    | -0.6133582  | 0.6686476   | 1.2820058   | 1.2820058  |
| COL3A1  | LAMA1    | -0.65799004 | 0.62341124  | 1.28140128  | 1.28140128 |
| ACPT    | KLHL34   | -0.51420414 | 0.7670853   | 1.28128944  | 1.28128944 |
| XRCC5   | SIRPA    | -0.5966819  | 0.6845096   | 1.2811915   | 1.2811915  |
| HLA-C   | PUS1     | -0.5816759  | 0.69945097  | 1.28112687  | 1.28112687 |
| NIPA2   | PDE7A    | 0.5098701   | -0.7702751  | -1.2801452  | 1.2801452  |
| ZBTB10  | HDAC1    | -0.6360605  | 0.64366376  | 1.27972426  | 1.27972426 |
| KIRREL  | LCLAT1   | -0.44309118 | 0.83655965  | 1.27965083  | 1.27965083 |
| SRD5A1  | COL6A3   | -0.6223125  | 0.65725946  | 1.27957196  | 1.27957196 |
| UBC     | TEC      | 0.75500816  | -0.5243374  | -1.27934556 | 1.27934556 |
| PSMB2   | RNF150   | -0.9076755  | 0.37138423  | 1.27905973  | 1.27905973 |
| CSF3R   | ZDHHC14  | -0.6145394  | 0.6642676   | 1.278807    | 1.278807   |
| RBM17   | SLIRP    | -0.5577912  | 0.7207314   | 1.2785226   | 1.2785226  |
| MCM6    | TM4SF18  | -0.6228355  | 0.6550845   | 1.27792     | 1.27792    |
| ESRRG   | SORBS1   | -0.54498845 | 0.73174226  | 1.27673071  | 1.27673071 |
| CSNK2A1 | QKI      | -0.47369668 | 0.80256504  | 1.27626172  | 1.27626172 |
| HDGF    | SOX4     | -0.6647953  | 0.611414    | 1.2762093   | 1.2762093  |
| XPO5    | SP3      | -0.43465114 | 0.8414475   | 1.27609864  | 1.27609864 |
| NIPA2   | MAN2B2   | -0.52879214 | 0.74604195  | 1.27483409  | 1.27483409 |
| LAMA1   | THBS3    | -0.6169418  | 0.65742236  | 1.27436416  | 1.27436416 |
| KARS    | VAV2     | 0.7770853   | -0.4971271  | -1.2742124  | 1.2742124  |
| PPA1    | TCEA3    | -0.842074   | 0.43186954  | 1.27394354  | 1.27394354 |
| TDRKH   | KCTD20   | -0.7611879  | 0.51246566  | 1.27365356  | 1.27365356 |
| LTA     | ATP5SL   | 0.61790764  | -0.6557371  | -1.27364474 | 1.27364474 |
| MRPL47  | ESD      | -0.65567225 | 0.6177055   | 1.27337775  | 1.27337775 |
| KSR1    | DHCR7    | -0.7011429  | 0.5712737   | 1.2724166   | 1.2724166  |
| ZNF608  | NIPA2    | -0.4183757  | 0.8539921   | 1.2723678   | 1.2723678  |
| ACVR2A  | OLMALINC | -0.61134523 | 0.66063213  | 1.27197736  | 1.27197736 |
| BRAP    | NT5DC1   | -0.51194835 | 0.75973016  | 1.27167851  | 1.27167851 |
| FOS     | ARPP21   | -0.6748435  | 0.5968049   | 1.2716484   | 1.2716484  |
| MOB3B   | SNRPC    | -0.49947715 | 0.7718912   | 1.27136835  | 1.27136835 |
| AIDA    | C10orf54 | 0.66780835  | -0.60333085 | -1.2711392  | 1.2711392  |
| SH3D19  | PRICKLE1 | 0.588061    | -0.68275344 | -1.27081444 | 1.27081444 |
| RCC2    | CPXM1    | -0.48165482 | 0.78911847  | 1.27077329  | 1.27077329 |
| ESRRG   | EHBP1    | -0.66181755 | 0.6088334   | 1.27065095  | 1.27065095 |
| CLCN3   | ZSCAN20  | -0.66053903 | 0.60970634  | 1.27024537  | 1.27024537 |
| STK10   | EGR1     | 0.8542187   | -0.41553533 | -1.26975403 | 1.26975403 |
| PCDH17  | TOP3A    | -0.60044414 | 0.668883    | 1.26932714  | 1.26932714 |
| MRPS14  | HPS6     | -0.5825855  | 0.6865051   | 1.2690906   | 1.2690906  |
| ZHX2    | ZNF202   | -0.4670785  | 0.8016713   | 1.2687498   | 1.2687498  |
| CASP8   | GART     | 0.57553095  | -0.69290364 | -1.26843459 | 1.26843459 |
| ESRRG   | KANK1    | -0.4917046  | 0.77668875  | 1.26839335  | 1.26839335 |
| VCAM1   | PPIL2    | -0.5320185  | 0.7362928   | 1.2683113   | 1.2683113  |

|              |          |             |             |             |            |
|--------------|----------|-------------|-------------|-------------|------------|
| APC          | POLR2G   | -0.47394142 | 0.7939028   | 1.26784422  | 1.26784422 |
| CSTF3        | HLA-B    | -0.40256575 | 0.86526024  | 1.26782599  | 1.26782599 |
| PPIL2        | TBC1D1   | -0.7138947  | 0.55367076  | 1.26756546  | 1.26756546 |
| RSPO3        | SLC25A29 | 0.54650295  | -0.72099197 | -1.26749492 | 1.26749492 |
| CYCS         | QSOX1    | 0.7508814   | -0.5158037  | -1.2666851  | 1.2666851  |
| MFAP3        | NFIA     | -0.6850633  | 0.5813792   | 1.2664425   | 1.2664425  |
| MMD          | SOX4     | 0.5056489   | -0.76073194 | -1.26638084 | 1.26638084 |
| TGM2         | TYW5     | 0.7522273   | -0.51390797 | -1.26613527 | 1.26613527 |
| APC          | NUTF2    | -0.61029077 | 0.65565896  | 1.26594973  | 1.26594973 |
| PPIL2        | AMOT     | 0.71436757  | -0.5507488  | -1.26511637 | 1.26511637 |
| KPNB1        | DCAF7    | -0.4774065  | 0.7871937   | 1.2646002   | 1.2646002  |
| MCM6         | RUFY3    | -0.7507518  | 0.5137244   | 1.2644762   | 1.2644762  |
| DKC1         | TOP2A    | 0.7207499   | -0.5431717  | -1.2639216  | 1.2639216  |
| MOCS2        | INPP5F   | -0.67144376 | 0.5921187   | 1.26356246  | 1.26356246 |
| CASP8        | CSTF3    | 0.39117992  | -0.87193155 | -1.26311147 | 1.26311147 |
| SPCS3        | SP3      | -0.42879662 | 0.8339435   | 1.26274012  | 1.26274012 |
| RACGAP1      | NFE2L1   | -0.6629     | 0.599812    | 1.262712    | 1.262712   |
| ITGB6        | MYOF     | 0.6040414   | -0.658583   | -1.2626244  | 1.2626244  |
| MCM4         | BST2     | 0.57062817  | -0.69127506 | -1.26190323 | 1.26190323 |
| DNAJC15      | MRPL17   | -0.8364428  | 0.42526132  | 1.26170412  | 1.26170412 |
| MFAP3        | SSPN     | -0.5191965  | 0.7422256   | 1.2614221   | 1.2614221  |
| NFIA         | AMMECR1  | 0.66065186  | -0.600358   | -1.26100986 | 1.26100986 |
| EFCAB14      | EFHD2    | -0.5642069  | 0.6961921   | 1.260399    | 1.260399   |
| PTGER3       | PRICKLE1 | 0.56714195  | -0.6925308  | -1.25967275 | 1.25967275 |
| MFAP3        | GEMIN4   | -0.6569424  | 0.6026585   | 1.2596009   | 1.2596009  |
| RAE1         | DCAF8    | -0.418044   | 0.8405329   | 1.2585769   | 1.2585769  |
| SFN          | SNU13    | 0.64818513  | -0.6103026  | -1.25848773 | 1.25848773 |
| ESRRG        | THRB     | -0.5717415  | 0.6863906   | 1.2581321   | 1.2581321  |
| PAPPA        | CTNNA1   | -0.5816931  | 0.67631376  | 1.25800686  | 1.25800686 |
| RAB27A       | LAGE3    | 0.5993815   | -0.65711904 | -1.25650054 | 1.25650054 |
| ESRRG        | CALM1    | -0.48427963 | 0.7721957   | 1.25647533  | 1.25647533 |
| CREB3L4      | ATG4B    | -0.49268857 | 0.76356953  | 1.2562581   | 1.2562581  |
| STAT3        | ARNTL    | -0.43507928 | 0.82089096  | 1.25597024  | 1.25597024 |
| CUX1         | COL15A1  | -0.6346019  | 0.62125856  | 1.25586046  | 1.25586046 |
| GYS1         | ZSCAN20  | -0.55446225 | 0.701254    | 1.25571625  | 1.25571625 |
| TK1          | DDAH2    | -0.7263438  | 0.52926314  | 1.25560694  | 1.25560694 |
| LOC100996692 | DNAJC9   | 0.52931434  | -0.7259336  | -1.25524794 | 1.25524794 |
| MUC1         | CTNNA1   | -0.85999155 | 0.39518526  | 1.25517681  | 1.25517681 |
| TUSC3        | ARHGEF2  | -0.6531047  | 0.6008362   | 1.2539409   | 1.2539409  |
| COL3A1       | PRMT8    | -0.83920074 | 0.41447073  | 1.25367147  | 1.25367147 |
| SOAT1        | STIM2    | -0.4096158  | 0.8435954   | 1.2532112   | 1.2532112  |
| ARPC5L       | FAXDC2   | -0.8226248  | 0.43036345  | 1.25298825  | 1.25298825 |
| RAB11A       | RAB40B   | -0.6919919  | 0.56070274  | 1.25269464  | 1.25269464 |
| ESRRG        | CYBRD1   | -0.58438814 | 0.6679339   | 1.25232204  | 1.25232204 |
| EBP          | ACAT2    | 0.7905813   | -0.4616097  | -1.252191   | 1.252191   |
| ACVR2A       | TRIT1    | -0.59917027 | 0.65285087  | 1.25202114  | 1.25202114 |
| GNAL         | NAB2     | 0.4851049   | -0.7668596  | -1.2519645  | 1.2519645  |
| RUFY3        | SRPRB    | -0.59400475 | 0.6566459   | 1.25065065  | 1.25065065 |
| RGS5         | HDAC1    | -0.7012007  | 0.5490282   | 1.2502289   | 1.2502289  |
| CTGF         | BGN      | 0.9142953   | -0.33578956 | -1.25008486 | 1.25008486 |
| GMFG         | MDN1     | -0.83810407 | 0.41161686  | 1.24972093  | 1.24972093 |
| TCEB3        | TCF3     | 0.5512225   | -0.69814813 | -1.24937063 | 1.24937063 |
| CDK6         | LIPF     | -0.5555869  | 0.69353265  | 1.24911955  | 1.24911955 |
| COLGALT1     | USP3     | -0.6202603  | 0.6279459   | 1.2482062   | 1.2482062  |
| XRCC5        | DHRS13   | 0.75274116  | -0.4953637  | -1.24810486 | 1.24810486 |



|          |          |             |             |             |            |
|----------|----------|-------------|-------------|-------------|------------|
| ZBTB7A   | ZBTB8B   | 0.6577854   | -0.59010416 | -1.24788956 | 1.24788956 |
| HLA-C    | MFSD12   | -0.60259694 | 0.6445654   | 1.24716234  | 1.24716234 |
| KLF9     | PRR14L   | -0.6454763  | 0.6014702   | 1.2469465   | 1.2469465  |
| SEPT11   | IRF1     | 0.67388785  | -0.5719302  | -1.24581805 | 1.24581805 |
| COPZ1    | AP3S2    | -0.7320422  | 0.5135248   | 1.245567    | 1.245567   |
| SRPRB    | MZF1     | -0.5279685  | 0.7175736   | 1.2455421   | 1.2455421  |
| SDC2     | THBS3    | 0.7265176   | -0.5186326  | -1.2451502  | 1.2451502  |
| QSOX1    | KIF20A   | -0.4270813  | 0.8177988   | 1.2448801   | 1.2448801  |
| GSTP1    | RACGAP1  | -0.66346496 | 0.58140224  | 1.2448672   | 1.2448672  |
| DTL      | MRPL47   | 0.74591464  | -0.49857715 | -1.24449179 | 1.24449179 |
| KCNK5    | TOP3A    | -0.6909144  | 0.553532    | 1.2444464   | 1.2444464  |
| PDIA5    | ARMC12   | -0.77292997 | 0.4712695   | 1.24419947  | 1.24419947 |
| RCC2     | MAN2B2   | -0.7497514  | 0.49442387  | 1.24417527  | 1.24417527 |
| KANSL2   | PDE7A    | 0.6435454   | -0.59974563 | -1.24329103 | 1.24329103 |
| NFIA     | TRIAP1   | -0.65981907 | 0.5833804   | 1.24319947  | 1.24319947 |
| ESRRG    | SGCB     | -0.5657875  | 0.6772725   | 1.24306     | 1.24306    |
| SET      | APOE     | -0.5876586  | 0.65531695  | 1.24297555  | 1.24297555 |
| PCNA     | EPHA1    | 0.56205016  | -0.6807435  | -1.24279366 | 1.24279366 |
| PTGER3   | NAB2     | 0.57025623  | -0.67234534 | -1.24260157 | 1.24260157 |
| NGFR     | TIMM23   | 0.6069994   | -0.63517964 | -1.24217904 | 1.24217904 |
| CSNK2A1  | CD48     | 0.6353478   | -0.6065509  | -1.2418987  | 1.2418987  |
| ESRRG    | DLG1     | -0.56595933 | 0.67561066  | 1.24156999  | 1.24156999 |
| TBL1X    | DCAF8    | -0.5542635  | 0.6867638   | 1.2410273   | 1.2410273  |
| EPS15    | PSMB3    | -0.70325464 | 0.5374246   | 1.24067924  | 1.24067924 |
| MFAP3    | TNFRSF21 | -0.60977143 | 0.63054264  | 1.24031407  | 1.24031407 |
| ZDHHC14  | SDPR     | 0.62823665  | -0.61187524 | -1.24011189 | 1.24011189 |
| LDLRAD4  | TIMELESS | -0.6573043  | 0.5827976   | 1.2401019   | 1.2401019  |
| KIF5B    | LZTS1    | 0.73037106  | -0.5088117  | -1.23918276 | 1.23918276 |
| NAALADL2 | MSRB1    | -0.56262267 | 0.6737894   | 1.23641207  | 1.23641207 |
| CYR61    | WISP1    | 0.6109724   | -0.6254056  | -1.236378   | 1.236378   |
| MTFP1    | SLC25A5  | 0.7654799   | -0.47073284 | -1.23621274 | 1.23621274 |
| PDHB     | ELK1     | 0.64272463  | -0.59270114 | -1.23542577 | 1.23542577 |
| COPZ1    | QKI      | -0.63264346 | 0.60231376  | 1.23495722  | 1.23495722 |
| ZHX2     | NIPA2    | -0.33735028 | 0.8975115   | 1.23486178  | 1.23486178 |
| DIEXF    | USP9X    | -0.41137776 | 0.82324433  | 1.23462209  | 1.23462209 |
| CTNNA1   | ADAMTS3  | -0.68176335 | 0.5528184   | 1.23458175  | 1.23458175 |
| CCT3     | DCAF7    | -0.5380505  | 0.69643104  | 1.23448154  | 1.23448154 |
| RBM17    | CSNK2A1  | -0.44787282 | 0.7865706   | 1.23444342  | 1.23444342 |
| SSPN     | STX6     | -0.69966686 | 0.5341431   | 1.23380996  | 1.23380996 |
| MUC1     | SORL1    | 0.5787616   | -0.6543253  | -1.2330869  | 1.2330869  |
| DCAF8    | WDR46    | -0.6283682  | 0.6044745   | 1.2328427   | 1.2328427  |
| DPT      | ARHGEF12 | -0.8579405  | 0.37457585  | 1.23251635  | 1.23251635 |
| CSPG4    | SUSD1    | -0.64370626 | 0.58862317  | 1.23232943  | 1.23232943 |
| LZTS1    | TNFAIP2  | -0.52054703 | 0.7116318   | 1.23217883  | 1.23217883 |
| MLH1     | SPEF2    | 0.37149334  | -0.86042136 | -1.2319147  | 1.2319147  |
| MRPL17   | CPEB1    | -0.8274026  | 0.40441838  | 1.23182098  | 1.23182098 |
| PFDN4    | CREB3L4  | 0.4406408   | -0.79113483 | -1.23177563 | 1.23177563 |
| FOXM1    | NDFIP2   | 0.7235189   | -0.5082417  | -1.2317606  | 1.2317606  |
| NEGR1    | PHF8     | 0.6168795   | -0.6148601  | -1.2317396  | 1.2317396  |
| C1QTNF6  | MRPL47   | 0.6093656   | -0.62122524 | -1.23059084 | 1.23059084 |
| KCNRG    | SLC25A13 | 0.46572876  | -0.7648463  | -1.23057506 | 1.23057506 |
| PCNA     | TMEM163  | -0.42255417 | 0.8078609   | 1.23041507  | 1.23041507 |
| SAP30L   | XPO5     | -0.63205475 | 0.59834296  | 1.23039771  | 1.23039771 |
| WWTR1    | AMOT     | -0.59752774 | 0.63270485  | 1.23023259  | 1.23023259 |
| CAST     | XRCC5    | -0.4013713  | 0.828773    | 1.2301443   | 1.2301443  |

|          |          |             |             |             |            |
|----------|----------|-------------|-------------|-------------|------------|
| DPT      | THBS3    | 0.5290055   | -0.7009276  | -1.2299331  | 1.2299331  |
| ESRRG    | SSFA2    | -0.58733183 | 0.64258385  | 1.22991568  | 1.22991568 |
| CTGF     | WISP1    | 0.68132305  | -0.5482444  | -1.22956745 | 1.22956745 |
| BID      | SSPN     | -0.7223754  | 0.50648147  | 1.22885687  | 1.22885687 |
| FANCI    | FANCB    | 0.6176202   | -0.6111999  | -1.2288201  | 1.2288201  |
| ACVR2A   | MPV17L   | -0.5101527  | 0.7182307   | 1.2283834   | 1.2283834  |
| GFRA4    | NFASC    | 0.8000866   | -0.42806047 | -1.22814707 | 1.22814707 |
| MFAP3    | PTPN21   | -0.49757022 | 0.72960913  | 1.22717935  | 1.22717935 |
| C1QBP    | CHI3L2   | 0.6982884   | -0.5285839  | -1.2268723  | 1.2268723  |
| ZBTB20   | SOX4     | 0.6579753   | -0.568618   | -1.2265933  | 1.2265933  |
| ZFP36L1  | KIAA1033 | 0.82980144  | -0.39626747 | -1.22606891 | 1.22606891 |
| ARHGEF12 | PCIF1    | 0.56313974  | -0.66209906 | -1.2252388  | 1.2252388  |
| NTRK2    | GNG12    | -0.81191343 | 0.41314188  | 1.22505531  | 1.22505531 |
| ESRRG    | RTN4     | -0.5156167  | 0.709066    | 1.2246827   | 1.2246827  |
| MPHOSPH6 | TSPAN9   | 0.61509746  | -0.60945016 | -1.22454762 | 1.22454762 |
| XPO1     | PPP1CA   | -0.39536154 | 0.8291399   | 1.22450144  | 1.22450144 |
| DCN      | NMNAT3   | 0.8556903   | -0.36873174 | -1.22442204 | 1.22442204 |
| PPIL2    | MIR503   | -0.7858424  | 0.4385641   | 1.2244065   | 1.2244065  |
| MAPKAP1  | EIF4G3   | 0.63442063  | -0.5898415  | -1.22426213 | 1.22426213 |
| SSBP2    | PEX5     | -0.55529904 | 0.668944    | 1.22424304  | 1.22424304 |
| MCM6     | EPHA1    | 0.58498955  | -0.6390379  | -1.22402745 | 1.22402745 |
| XRCC5    | THRB     | -0.7427294  | 0.48075923  | 1.22348863  | 1.22348863 |
| FOXJ2    | LPIN1    | 0.3793529   | -0.8439967  | -1.2233496  | 1.2233496  |
| KALRN    | ENO3     | -0.60300493 | 0.62026596  | 1.22327089  | 1.22327089 |
| CSNK2A1  | KCNQ4    | -0.6339098  | 0.5891574   | 1.2230672   | 1.2230672  |
| ITGB6    | TNC      | 0.66467714  | -0.5583196  | -1.22299674 | 1.22299674 |
| ESRRG    | PRRC2A   | 0.6343329   | -0.588512   | -1.2228449  | 1.2228449  |
| DNMT1    | PCMTD1   | -0.71268237 | 0.5099577   | 1.22264007  | 1.22264007 |
| MED15    | RACGAP1  | -0.6363869  | 0.5859455   | 1.2223324   | 1.2223324  |
| PRICKLE1 | CD164    | 0.7149994   | -0.50563186 | -1.22063126 | 1.22063126 |
| RUFY3    | ZWILCH   | -0.7970466  | 0.42337856  | 1.22042516  | 1.22042516 |
| CLIP1    | EIF4G3   | 0.6190065   | -0.6013059  | -1.2203124  | 1.2203124  |
| ESRRG    | PDZD2    | -0.5786031  | 0.64139843  | 1.22000153  | 1.22000153 |
| ALDH5A1  | SLC2A5   | 0.56889266  | -0.6504569  | -1.21934956 | 1.21934956 |
| TP53BP1  | PRR14L   | -0.6700975  | 0.5489637   | 1.2190612   | 1.2190612  |
| MUC1     | KCND3    | 0.5494348   | -0.669583   | -1.2190178  | 1.2190178  |
| XRCC5    | CPNE3    | -0.647098   | 0.5718199   | 1.2189179   | 1.2189179  |
| FAM96A   | RBM17    | -0.7590593  | 0.45921287  | 1.21827217  | 1.21827217 |
| KANK1    | SOX4     | 0.504389    | -0.7138055  | -1.2181945  | 1.2181945  |
| BMP15    | ZSCAN20  | 0.5589186   | -0.65923357 | -1.21815217 | 1.21815217 |
| XRCC5    | PDE4DIP  | -0.73589355 | 0.4822489   | 1.21814245  | 1.21814245 |
| ANKRD28  | ZWILCH   | -0.6711186  | 0.54566497  | 1.21678357  | 1.21678357 |
| ZDHHC14  | HGF      | 0.70396596  | -0.5125947  | -1.21656066 | 1.21656066 |
| GET4     | TCF3     | 0.88628805  | -0.32980064 | -1.21608869 | 1.21608869 |
| PLA2G2A  | ESRRG    | 0.42887336  | -0.78685474 | -1.2157281  | 1.2157281  |
| ATP6V1G1 | C10orf54 | -0.61456835 | 0.60099983  | 1.21556818  | 1.21556818 |
| ZNF608   | KIAA0391 | -0.46286684 | 0.75268555  | 1.21555239  | 1.21555239 |
| MCM3     | PTTG1    | 0.8143693   | -0.400565   | -1.2149343  | 1.2149343  |
| NUDCD2   | HLA-C    | -0.7280905  | 0.48678458  | 1.21487508  | 1.21487508 |
| DLG1     | EIF4G3   | 0.7213695   | -0.49307704 | -1.21444654 | 1.21444654 |
| UBC      | STX6     | -0.47045258 | 0.7437598   | 1.21421238  | 1.21421238 |
| APC      | PSMB3    | -0.51573616 | 0.6981604   | 1.21389656  | 1.21389656 |
| SHMT1    | PGF      | -0.73984903 | 0.473753    | 1.21360203  | 1.21360203 |
| WTAP     | UCK2     | 0.8057297   | -0.40731123 | -1.21304093 | 1.21304093 |
| NVL      | HLA-C    | -0.65263045 | 0.56034464  | 1.21297509  | 1.21297509 |

|          |         |             |             |             |            |
|----------|---------|-------------|-------------|-------------|------------|
| HLF      | ZDHHC14 | 0.73020333  | -0.48276445 | -1.21296778 | 1.21296778 |
| FOXN3    | PI3     | -0.8559093  | 0.3567367   | 1.212646    | 1.212646   |
| MVP      | FOS     | 0.53318423  | -0.67943096 | -1.21261519 | 1.21261519 |
| BID      | RNASE4  | -0.67543596 | 0.53686446  | 1.21230042  | 1.21230042 |
| STX6     | SLC43A2 | 0.74688107  | -0.46477836 | -1.21165943 | 1.21165943 |
| EPS15    | NPC1    | -0.4847582  | 0.7267547   | 1.2115129   | 1.2115129  |
| UBC      | MCM3    | -0.5083812  | 0.7026548   | 1.211036    | 1.211036   |
| DKC1     | RBM17   | -0.56339586 | 0.6475767   | 1.21097256  | 1.21097256 |
| LDLRAD4  | UBE2B   | 0.8111707   | -0.39975074 | -1.21092144 | 1.21092144 |
| TMEM254  | SNRNP48 | -0.8301726  | 0.37991786  | 1.21009046  | 1.21009046 |
| LPCAT1   | AUP1    | -0.43902025 | 0.7709513   | 1.20997155  | 1.20997155 |
| CA12     | DSG2    | -0.6232619  | 0.585738    | 1.2089999   | 1.2089999  |
| QSOX1    | PDZRN3  | 0.5621109   | -0.64637685 | -1.20848775 | 1.20848775 |
| RELB     | SLC25A5 | 0.46140906  | -0.74706733 | -1.20847639 | 1.20847639 |
| CTGF     | ARPP21  | -0.7496509  | 0.45866063  | 1.20831153  | 1.20831153 |
| SERPINA1 | PI3     | 0.6342295   | -0.5737411  | -1.2079706  | 1.2079706  |
| ESRRG    | PHF10   | -0.5886924  | 0.6190434   | 1.2077358   | 1.2077358  |
| MED31    | RRN3    | -0.5567875  | 0.65089005  | 1.20767755  | 1.20767755 |
| SGCB     | RACGAP1 | -0.7941288  | 0.41353214  | 1.20766094  | 1.20766094 |
| DNMT1    | RAB27A  | 0.8259695   | -0.38159367 | -1.20756317 | 1.20756317 |
| BID      | ZHX3    | -0.6931899  | 0.5142995   | 1.2074894   | 1.2074894  |
| CAP2     | MRPS22  | -0.6373016  | 0.5699375   | 1.2072391   | 1.2072391  |
| MYOC     | LY75    | 0.6175837   | -0.5896173  | -1.207201   | 1.207201   |
| MAPK10   | MOCOS   | -0.64155585 | 0.5656176   | 1.20717345  | 1.20717345 |
| NPM1     | PPA1    | 0.7003791   | -0.50677365 | -1.20715275 | 1.20715275 |
| EGR1     | IGFBP4  | 0.48819414  | -0.7187546  | -1.20694874 | 1.20694874 |
| UBE2B    | RTN4    | 0.8929009   | -0.31329998 | -1.20620088 | 1.20620088 |
| PCNA     | HLA-C   | -0.54737633 | 0.6588227   | 1.20619903  | 1.20619903 |
| PGRMC2   | SOX4    | 0.37783256  | -0.82830137 | -1.20613393 | 1.20613393 |
| ZNF148   | HDAC1   | -0.5784274  | 0.6275175   | 1.2059449   | 1.2059449  |
| GMPS     | CSTF3   | 0.79270095  | -0.41226947 | -1.20497042 | 1.20497042 |
| PGF      | IRF2BP2 | 0.70994025  | -0.4949839  | -1.20492415 | 1.20492415 |
| CSF3R    | FNDC1   | -0.6978643  | 0.50656456  | 1.20442886  | 1.20442886 |
| HDAC11   | YARS    | -0.65049446 | 0.5537837   | 1.20427816  | 1.20427816 |
| GALNT2   | CST1    | 0.46672082  | -0.73749727 | -1.20421809 | 1.20421809 |
| IGF1     | AP3M1   | -0.7526485  | 0.45096508  | 1.20361358  | 1.20361358 |
| ZDHHC14  | SRI     | 0.6806784   | -0.5218747  | -1.2025531  | 1.2025531  |
| APC      | MED31   | -0.5342431  | 0.66795975  | 1.20220285  | 1.20220285 |
| BYSL     | HDAC1   | 0.7240958   | -0.47808442 | -1.20218022 | 1.20218022 |
| TBL2     | TM4SF18 | -0.56094426 | 0.6408546   | 1.20179886  | 1.20179886 |
| CCDC3    | POPDC3  | -0.43916762 | 0.7625941   | 1.20176172  | 1.20176172 |
| DHX30    | HLA-C   | -0.34993175 | 0.8517271   | 1.20165885  | 1.20165885 |
| TRA2B    | CHD1L   | 0.37040603  | -0.83092296 | -1.20132899 | 1.20132899 |
| SF3B3    | ZNF467  | -0.4807722  | 0.7202178   | 1.20099     | 1.20099    |
| BID      | AMIGO1  | -0.5875342  | 0.61321664  | 1.20075084  | 1.20075084 |
| SLC7A1   | INIP    | 0.54728913  | -0.6533572  | -1.20064633 | 1.20064633 |
| RMI1     | SESN1   | -0.43570518 | 0.76488334  | 1.20058852  | 1.20058852 |
| ACVR2A   | ORC5    | -0.50421166 | 0.6960588   | 1.20027046  | 1.20027046 |
| SSPN     | SOX4    | 0.4918691   | -0.7081314  | -1.2000005  | 1.2000005  |
| ZDHHC14  | CRTAP   | 0.48250887  | -0.71682394 | -1.19933281 | 1.19933281 |
| HLA-G    | FAM216A | -0.49025768 | 0.70902824  | 1.19928592  | 1.19928592 |
| EPS15    | C3orf17 | -0.35723168 | 0.8416689   | 1.19890058  | 1.19890058 |
| XRCC5    | TM9SF3  | -0.49753264 | 0.7011743   | 1.19870694  | 1.19870694 |
| EMC6     | HOXA7   | -0.6081232  | 0.59016865  | 1.19829185  | 1.19829185 |
| ARNTL    | MLXIP   | -0.6965945  | 0.5013171   | 1.1979116   | 1.1979116  |



|           |          |             |             |             |            |
|-----------|----------|-------------|-------------|-------------|------------|
| CSF3R     | BMP1     | -0.58471745 | 0.61303264  | 1.19775009  | 1.19775009 |
| KARS      | PDZRN3   | -0.52446103 | 0.6730614   | 1.19752243  | 1.19752243 |
| KLF12     | SRPRB    | 0.37137428  | -0.82602894 | -1.19740322 | 1.19740322 |
| LOC145783 | PPIL2    | -0.54318017 | 0.65399486  | 1.19717503  | 1.19717503 |
| WWTR1     | SLC39A6  | -0.3537459  | 0.8429494   | 1.1966953   | 1.1966953  |
| PALLD     | SLC39A6  | -0.51257986 | 0.68365586  | 1.19623572  | 1.19623572 |
| KARS      | PDE4DIP  | -0.591933   | 0.6040287   | 1.1959617   | 1.1959617  |
| LIPF      | VAMP3    | -0.54262584 | 0.65315574  | 1.19578158  | 1.19578158 |
| SH3PXD2A  | TAB2     | -0.74847454 | 0.44730538  | 1.19577992  | 1.19577992 |
| ANKRD28   | MTHFD1L  | -0.39404166 | 0.801708    | 1.19574966  | 1.19574966 |
| ESRRG     | AGFG1    | -0.6163158  | 0.5793373   | 1.1956531   | 1.1956531  |
| SNCG      | MCM3     | 0.4127377   | -0.78263354 | -1.19537124 | 1.19537124 |
| RBMS3     | SOX4     | 0.57174957  | -0.6236116  | -1.19536117 | 1.19536117 |
| XPO1      | POSTN    | -0.5100051  | 0.68519276  | 1.19519786  | 1.19519786 |
| ESRRG     | SESTD1   | -0.5691449  | 0.626018    | 1.1951629   | 1.1951629  |
| HLF       | MRPS22   | -0.5320048  | 0.6631159   | 1.1951207   | 1.1951207  |
| ADAM10    | PFDN4    | 0.5455552   | -0.6489095  | -1.1944647  | 1.1944647  |
| DCN       | LTBP4    | 0.9358703   | -0.25856522 | -1.19443552 | 1.19443552 |
| KARS      | NFIA     | -0.5050513  | 0.68935597  | 1.19440727  | 1.19440727 |
| MCM3      | SPAG5    | 0.73816586  | -0.4560622  | -1.19422806 | 1.19422806 |
| ADGRA2    | MMAB     | -0.39438456 | 0.7996576   | 1.19404216  | 1.19404216 |
| ZDHHC14   | SH3D19   | 0.5728191   | -0.62102103 | -1.19384013 | 1.19384013 |
| IGF2R     | NUDT21   | -0.4874406  | 0.70636874  | 1.19380934  | 1.19380934 |
| XRCC5     | MOB3B    | -0.54961085 | 0.6441632   | 1.19377405  | 1.19377405 |
| MCM4      | MCM3     | 0.86193496  | -0.33182037 | -1.19375533 | 1.19375533 |
| ESRRG     | MMD      | -0.51475394 | 0.6789423   | 1.19369624  | 1.19369624 |
| SLC39A6   | PHF8     | 0.4601628   | -0.7332699  | -1.1934327  | 1.1934327  |
| MTHFD1L   | ABCA1    | -0.6510945  | 0.5420013   | 1.1930958   | 1.1930958  |
| DDX6      | DDX54    | -0.61319894 | 0.57970726  | 1.1929062   | 1.1929062  |
| NEGR1     | SEMA4B   | 0.5695496   | -0.6230023  | -1.1925519  | 1.1925519  |
| HSP90AA1  | C1QTNF6  | 0.51867145  | -0.6738759  | -1.19254735 | 1.19254735 |
| RAB8B     | TSPAN9   | 0.8186535   | -0.3737489  | -1.1924024  | 1.1924024  |
| POPDC3    | FEZ2     | -0.53356165 | 0.6587838   | 1.19234545  | 1.19234545 |
| BID       | BCL2L1   | 0.6780408   | -0.51420134 | -1.19224214 | 1.19224214 |
| PCNA      | QKI      | -0.6723786  | 0.51972324  | 1.19210184  | 1.19210184 |
| KALRN     | PNPT1    | -0.33943245 | 0.8525851   | 1.19201755  | 1.19201755 |
| ZFP36L1   | ABCA1    | 0.41938925  | -0.7720076  | -1.19139685 | 1.19139685 |
| UNC5C     | FOXO3    | -0.46749675 | 0.72376174  | 1.19125849  | 1.19125849 |
| EIF6      | DNAJC15  | -0.46461016 | 0.72606474  | 1.1906749   | 1.1906749  |
| VLDLR     | HSD17B6  | 0.8667801   | -0.32350552 | -1.19028562 | 1.19028562 |
| RSPO3     | C10orf90 | -0.8119126  | 0.37814882  | 1.19006142  | 1.19006142 |
| COL5A1    | FCN1     | -0.34237522 | 0.8476598   | 1.19003502  | 1.19003502 |
| HDAC1     | IL2      | 0.6584248   | -0.5314071  | -1.1898319  | 1.1898319  |
| DDB2      | DPH7     | -0.6073336  | 0.5823325   | 1.1896661   | 1.1896661  |
| PALLD     | NEGR1    | -0.5843992  | 0.6051836   | 1.1895828   | 1.1895828  |
| PTPN2     | CTNNA1   | -0.63019276 | 0.55935156  | 1.18954432  | 1.18954432 |
| TOP2A     | EXOSC8   | 0.60555494  | -0.5838029  | -1.18935784 | 1.18935784 |
| RSPO3     | MZF1     | 0.62120795  | -0.5679554  | -1.18916335 | 1.18916335 |
| COLGALT1  | DCAF8    | -0.3894305  | 0.79959     | 1.1890205   | 1.1890205  |
| PDIA5     | MZF1     | -0.3056723  | 0.88283706  | 1.18850936  | 1.18850936 |
| SS18L2    | DPP3     | 0.83933985  | -0.3491486  | -1.18848845 | 1.18848845 |
| MGAT5     | ADGRV1   | -0.73265886 | 0.4553949   | 1.18805376  | 1.18805376 |
| LOC145783 | PDE7A    | 0.6139575   | -0.5739444  | -1.1879019  | 1.1879019  |
| TNC       | FAT3     | -0.3740908  | 0.81351674  | 1.18760754  | 1.18760754 |
| PSMB2     | CRTAP    | -0.43968195 | 0.74788505  | 1.187567    | 1.187567   |

|         |          |             |             |             |            |
|---------|----------|-------------|-------------|-------------|------------|
| GAPDH   | RBM17    | -0.79458725 | 0.3927499   | 1.18733715  | 1.18733715 |
| DHRS12  | MRPL47   | -0.73969173 | 0.4476082   | 1.18729993  | 1.18729993 |
| SFN     | GGCT     | 0.58096105  | -0.6060224  | -1.18698345 | 1.18698345 |
| RAB35   | AHI1     | 0.6014385   | -0.58553165 | -1.18697015 | 1.18697015 |
| ZBTB44  | SPEF2    | -0.5267331  | 0.66023093  | 1.18696403  | 1.18696403 |
| TRIM27  | MZF1     | -0.41366524 | 0.77324176  | 1.186907    | 1.186907   |
| OPRK1   | FOXO3    | -0.52247095 | 0.6642956   | 1.18676655  | 1.18676655 |
| NEGR1   | MXRA7    | -0.6327778  | 0.5537938   | 1.1865716   | 1.1865716  |
| SSB     | LRP8     | 0.5887686   | -0.5974073  | -1.1861759  | 1.1861759  |
| LAMA1   | STK36    | -0.48783937 | 0.69827884  | 1.18611821  | 1.18611821 |
| SFN     | DKC1     | 0.7683763   | -0.41756693 | -1.18594323 | 1.18594323 |
| SERBP1  | SPG20    | -0.57173276 | 0.61413366  | 1.18586642  | 1.18586642 |
| PAX2    | UNC5C    | 0.557459    | -0.6281025  | -1.1855615  | 1.1855615  |
| NOL10   | SPEF2    | 0.37817174  | -0.8073772  | -1.18554894 | 1.18554894 |
| GALNT2  | EBF1     | -0.6575077  | 0.5279767   | 1.1854844   | 1.1854844  |
| PDE4DIP | MFAP3    | -0.42271295 | 0.7626399   | 1.18535285  | 1.18535285 |
| GTF2I   | SOX4     | 0.71291053  | -0.47237834 | -1.18528887 | 1.18528887 |
| TUFM    | HLA-C    | -0.5745392  | 0.6098776   | 1.1844168   | 1.1844168  |
| TYRO3   | CBLN4    | 0.68476135  | -0.4995956  | -1.18435695 | 1.18435695 |
| MUTYH   | SLAMF1   | 0.5651028   | -0.6191551  | -1.1842579  | 1.1842579  |
| PPIL2   | STIM2    | -0.43738225 | 0.7465167   | 1.18389895  | 1.18389895 |
| LARP6   | SOX4     | 0.5251476   | -0.6587213  | -1.1838689  | 1.1838689  |
| ARNTL   | OSMR     | -0.5711806  | 0.6124866   | 1.1836672   | 1.1836672  |
| PI3     | JDP2     | -0.6969975  | 0.48662752  | 1.18362502  | 1.18362502 |
| PSMA4   | TCEA3    | -0.72485185 | 0.45848715  | 1.183339    | 1.183339   |
| TEC     | PTPN21   | 0.62572354  | -0.5575818  | -1.18330534 | 1.18330534 |
| TRIAP1  | PCED1B   | -0.65734273 | 0.5259372   | 1.18327993  | 1.18327993 |
| DCUN1D5 | KLF12    | 0.31545037  | -0.86744386 | -1.18289423 | 1.18289423 |
| SCML2   | PER3     | -0.60513276 | 0.5776438   | 1.18277656  | 1.18277656 |
| MCM3    | ZBTB20   | -0.8913736  | 0.29104275  | 1.18241635  | 1.18241635 |
| EFEMP2  | NID2     | 0.61518186  | -0.56723356 | -1.18241542 | 1.18241542 |
| PTDSS1  | INF2     | 0.5415107   | -0.64086986 | -1.18238056 | 1.18238056 |
| GSTM3   | URI1     | -0.6261838  | 0.5561902   | 1.182374    | 1.182374   |
| SCRN1   | BMP1     | 0.7231019   | -0.45920885 | -1.18231075 | 1.18231075 |
| AGTRAP  | ENTHD2   | -0.3687012  | 0.81358516  | 1.18228636  | 1.18228636 |
| ZNF608  | NAT10    | -0.4279866  | 0.7542589   | 1.1822455   | 1.1822455  |
| SNTB2   | THBS3    | 0.85635376  | -0.32570976 | -1.18206352 | 1.18206352 |
| ITGB6   | OGFOD2   | -0.7726727  | 0.40902522  | 1.18169792  | 1.18169792 |
| AGPAT5  | CSPG5    | -0.40926233 | 0.7721068   | 1.18136913  | 1.18136913 |
| VCAM1   | STX7     | 0.5451238   | -0.6361771  | -1.1813009  | 1.1813009  |
| ACVR2A  | RAB13    | 0.42153862  | -0.7596195  | -1.18115812 | 1.18115812 |
| MANF    | EPHX2    | -0.7676973  | 0.41341725  | 1.18111455  | 1.18111455 |
| EZH2    | EBP      | 0.56592566  | -0.61484826 | -1.18077392 | 1.18077392 |
| ACACA   | FAM43A   | -0.5872639  | 0.59336823  | 1.18063213  | 1.18063213 |
| TRIO    | ARHGEF37 | -0.75964236 | 0.42085308  | 1.18049544  | 1.18049544 |
| SFN     | SERBP1   | 0.71890205  | -0.46149254 | -1.18039459 | 1.18039459 |
| DDX20   | SUFU     | -0.5386305  | 0.6417277   | 1.1803582   | 1.1803582  |
| TRMT13  | AGPAT5   | -0.53315717 | 0.6471424   | 1.18029957  | 1.18029957 |
| TOP2A   | TUSC3    | 0.56902194  | -0.61104226 | -1.1800642  | 1.1800642  |
| SFN     | PSMB3    | 0.6704302   | -0.50959593 | -1.18002613 | 1.18002613 |
| TAOK3   | GALNT2   | -0.6665475  | 0.5133153   | 1.1798628   | 1.1798628  |
| ESRRG   | LDLRAD4  | -0.5257557  | 0.65377116  | 1.17952686  | 1.17952686 |
| SF3B3   | SLC25A29 | -0.5854143  | 0.59371686  | 1.17913116  | 1.17913116 |
| ABI2    | NOL8     | 0.79753774  | -0.38143715 | -1.17897489 | 1.17897489 |
| KANSL1  | FOXK2    | -0.6709261  | 0.50779504  | 1.17872114  | 1.17872114 |

|          |          |             |             |             |            |
|----------|----------|-------------|-------------|-------------|------------|
| MFAP3    | ADPGK    | -0.4005727  | 0.7781077   | 1.1786804   | 1.1786804  |
| KALRN    | SOBP     | 0.51905924  | -0.65922225 | -1.17828149 | 1.17828149 |
| KIRREL   | MTHFD1L  | -0.37114424 | 0.8070723   | 1.17821654  | 1.17821654 |
| PJA2     | MALT1    | -0.8521082  | 0.3259926   | 1.1781008   | 1.1781008  |
| ITPA     | BECN1    | 0.6645461   | -0.51349026 | -1.17803636 | 1.17803636 |
| MAPK10   | PRICKLE1 | 0.78494626  | -0.39296487 | -1.17791113 | 1.17791113 |
| UBE2B    | NDN      | 0.7792534   | -0.3983822  | -1.1776356  | 1.1776356  |
| C12orf76 | PGS1     | 0.45741364  | -0.7200913  | -1.17750494 | 1.17750494 |
| SSBP2    | SH3PXD2A | -0.6422345  | 0.53472066  | 1.17695516  | 1.17695516 |
| RUVBL2   | MCM4     | 0.8200741   | -0.3568373  | -1.1769114  | 1.1769114  |
| SRPRB    | SP3      | -0.4636295  | 0.7131338   | 1.1767633   | 1.1767633  |
| COL15A1  | SORL1    | -0.49436283 | 0.6823311   | 1.17669393  | 1.17669393 |
| EBF1     | SLIRP    | -0.6768384  | 0.49922705  | 1.17606545  | 1.17606545 |
| APC      | TRIM27   | -0.56901246 | 0.6068926   | 1.17590506  | 1.17590506 |
| CBX4     | ARHGEF2  | -0.3969752  | 0.77885234  | 1.17582754  | 1.17582754 |
| POC1A    | IDNK     | -0.73857385 | 0.4369997   | 1.17557355  | 1.17557355 |
| AK2      | SMOX     | 0.4398321   | -0.73568743 | -1.17551953 | 1.17551953 |
| SNRPC    | VAMP4    | -0.61024857 | 0.5652271   | 1.17547567  | 1.17547567 |
| C4A      | VANGL1   | -0.54589427 | 0.629502    | 1.17539627  | 1.17539627 |
| MCM6     | QKI      | -0.7469317  | 0.4281812   | 1.1751129   | 1.1751129  |
| DIAPH1   | SOX4     | -0.622739   | 0.5522068   | 1.1749458   | 1.1749458  |
| HPS6     | ATP6V0E2 | -0.74057734 | 0.43431586  | 1.1748932   | 1.1748932  |
| XPO1     | MLXIP    | -0.4714365  | 0.7031318   | 1.1745683   | 1.1745683  |
| PDZRN3   | MRPS22   | -0.463729   | 0.71073925  | 1.17446825  | 1.17446825 |
| MED14    | HLA-C    | -0.46427476 | 0.7101785   | 1.17445326  | 1.17445326 |
| TRAF3IP1 | GALNT2   | -0.56073445 | 0.61346555  | 1.1742      | 1.1742     |
| UBC      | PCNA     | -0.5420241  | 0.6319789   | 1.174003    | 1.174003   |
| ACLY     | DUSP1    | -0.6097661  | 0.5639476   | 1.1737137   | 1.1737137  |
| QKI      | PNPT1    | -0.6164963  | 0.55719644  | 1.17369274  | 1.17369274 |
| GNAL     | CERS5    | 0.70459515  | -0.46894807 | -1.17354322 | 1.17354322 |
| XPO1     | AMMECR1  | 0.42881215  | -0.74465036 | -1.17346251 | 1.17346251 |
| PFDN4    | USP3     | 0.60700786  | -0.56634647 | -1.17335433 | 1.17335433 |
| ZNF608   | MFSD12   | -0.668559   | 0.50416416  | 1.17272316  | 1.17272316 |
| PPA1     | DHRS12   | -0.48667112 | 0.68595815  | 1.17262927  | 1.17262927 |
| TRIM25   | LARS2    | 0.7458449   | -0.4267514  | -1.1725963  | 1.1725963  |
| PDIA4    | BCL2L1   | 0.41521782  | -0.7573309  | -1.17254872 | 1.17254872 |
| DCAF8    | SF3B3    | -0.72542244 | 0.44709456  | 1.172517    | 1.172517   |
| FCF1     | ZSCAN20  | 0.5641629   | -0.60831195 | -1.17247485 | 1.17247485 |
| TMEM163  | ATP6V0E2 | 0.81684154  | -0.35548884 | -1.17233038 | 1.17233038 |
| EPHX2    | NOL10    | -0.43456358 | 0.73747164  | 1.17203522  | 1.17203522 |
| STAT3    | JUNB     | 0.62601656  | -0.5454114  | -1.17142796 | 1.17142796 |
| ATP1B3   | SLC24A4  | -0.77379423 | 0.39748442  | 1.17127865  | 1.17127865 |
| ADRA1B   | GMFG     | 0.47398096  | -0.6970364  | -1.17101736 | 1.17101736 |
| MOCOS    | TCF3     | 0.6137914   | -0.55696535 | -1.17075675 | 1.17075675 |
| MCM3     | CHD2     | -0.6058033  | 0.5646926   | 1.1704959   | 1.1704959  |
| MAP1B    | CD40     | 0.49613935  | -0.67409074 | -1.17023009 | 1.17023009 |
| KALRN    | ZWILCH   | -0.46938023 | 0.7008182   | 1.17019843  | 1.17019843 |
| KLF12    | NIPA2    | 0.31777748  | -0.8519454  | -1.16972288 | 1.16972288 |
| PELP1    | PHF8     | 0.6664695   | -0.5032513  | -1.1697208  | 1.1697208  |
| GAPDH    | FAT3     | -0.6191597  | 0.55053127  | 1.16969097  | 1.16969097 |
| GNAQ     | RACGAP1  | -0.53943247 | 0.63008803  | 1.1695205   | 1.1695205  |
| MFAP3    | AACS     | -0.6338949  | 0.53551376  | 1.16940866  | 1.16940866 |
| XPO1     | IPO11    | -0.6258964  | 0.54343957  | 1.16933597  | 1.16933597 |
| KIRREL   | NOL8     | -0.37321374 | 0.79609835  | 1.16931209  | 1.16931209 |
| KARS     | LMNB2    | 0.79333794  | -0.37594557 | -1.16928351 | 1.16928351 |

|          |          |             |             |             |            |
|----------|----------|-------------|-------------|-------------|------------|
| ADA      | ENTHD2   | -0.65718454 | 0.51197     | 1.16915454  | 1.16915454 |
| KSR1     | CCT3     | -0.55880284 | 0.6099007   | 1.16870354  | 1.16870354 |
| ENOSF1   | VPS16    | -0.54106086 | 0.6274384   | 1.16849926  | 1.16849926 |
| IGF2R    | ACTN3    | 0.3440902   | -0.82413274 | -1.16822294 | 1.16822294 |
| RUFY3    | FANCI    | -0.72921365 | 0.4386647   | 1.16787835  | 1.16787835 |
| IPO11    | RNF130   | -0.5468497  | 0.62102044  | 1.16787014  | 1.16787014 |
| MFAP3    | CCDC90B  | -0.57435095 | 0.59333926  | 1.16769021  | 1.16769021 |
| SFN      | RACGAP1  | 0.6797043   | -0.48782387 | -1.16752817 | 1.16752817 |
| AK2      | FOXJ2    | 0.45430356  | -0.7130226  | -1.16732616 | 1.16732616 |
| HCRTR2   | PDE7A    | -0.5402106  | 0.62684065  | 1.16705125  | 1.16705125 |
| FANCA    | CDK1     | 0.7449918   | -0.42201433 | -1.16700613 | 1.16700613 |
| APC      | MAP4K4   | -0.6490401  | 0.51782197  | 1.16686207  | 1.16686207 |
| EFCAB14  | GET4     | -0.37335375 | 0.79350424  | 1.16685799  | 1.16685799 |
| WRAP53   | PRR11    | 0.8110003   | -0.3557268  | -1.1667271  | 1.1667271  |
| USP4     | ZNF276   | -0.7989136  | 0.3675607   | 1.1664743   | 1.1664743  |
| THRB     | PSMA4    | -0.72149396 | 0.44486308  | 1.16635704  | 1.16635704 |
| PCNA     | CDKN3    | 0.8788936   | -0.28739098 | -1.16628458 | 1.16628458 |
| CASP8    | DIEXF    | 0.5350598   | -0.6312001  | -1.1662599  | 1.1662599  |
| EPS15    | TXNL1    | -0.37063757 | 0.7955057   | 1.16614327  | 1.16614327 |
| PFDN4    | EXOSC8   | 0.5361857   | -0.6293977  | -1.1655834  | 1.1655834  |
| BZW2     | TEFM     | -0.6958247  | 0.4695608   | 1.1653855   | 1.1653855  |
| CDK6     | CDK10    | 0.37102935  | -0.79431385 | -1.1653432  | 1.1653432  |
| MFAP3    | TRMT13   | -0.69963247 | 0.46569648  | 1.16532895  | 1.16532895 |
| EIF4E3   | MRPL47   | -0.43915656 | 0.7259841   | 1.16514066  | 1.16514066 |
| ACVR2A   | WDR27    | 0.73194844  | -0.43315393 | -1.16510237 | 1.16510237 |
| CSF3R    | CERS5    | -0.72489387 | 0.44004363  | 1.1649375   | 1.1649375  |
| MGAT5    | KALRN    | 0.42668894  | -0.73813635 | -1.16482529 | 1.16482529 |
| NAALADL2 | FOPNL    | -0.54714906 | 0.617451    | 1.16460006  | 1.16460006 |
| QDPR     | QSOX1    | 0.6888171   | -0.4756734  | -1.1644905  | 1.1644905  |
| CALD1    | COL3A1   | 0.7369608   | -0.42747268 | -1.16443348 | 1.16443348 |
| SAA4     | PALMD    | -0.5643909  | 0.59980404  | 1.16419494  | 1.16419494 |
| CAB39L   | YME1L1   | 0.5409567   | -0.623102   | -1.1640587  | 1.1640587  |
| FOXJ2    | PDE7A    | -0.51072663 | 0.65251195  | 1.16323858  | 1.16323858 |
| MFAP3    | PPM1A    | -0.6083808  | 0.5548258   | 1.1632066   | 1.1632066  |
| NEGR1    | CEP112   | -0.5783376  | 0.5848478   | 1.1631854   | 1.1631854  |
| SPIRE2   | LCMT2    | 0.5783275   | -0.58478874 | -1.16311624 | 1.16311624 |
| KLF12    | MED31    | 0.4543897   | -0.70844424 | -1.16283394 | 1.16283394 |
| CAST     | RBM45    | -0.34418926 | 0.8180549   | 1.16224416  | 1.16224416 |
| ITGB1    | COL6A3   | 0.51354903  | -0.64867896 | -1.16222799 | 1.16222799 |
| MCM5     | MCM4     | 0.73123837  | -0.43095213 | -1.1621905  | 1.1621905  |
| APC      | PTDSS1   | -0.5093927  | 0.6523878   | 1.1617805   | 1.1617805  |
| FAM96A   | TSPAN9   | 0.5425861   | -0.6191251  | -1.1617112  | 1.1617112  |
| PPA1     | S100A16  | 0.60200536  | -0.5594825  | -1.16148786 | 1.16148786 |
| GMPS     | CDCA7    | 0.917208    | -0.24426004 | -1.16146804 | 1.16146804 |
| ZNF385D  | LBP      | 0.7586787   | -0.40264794 | -1.16132664 | 1.16132664 |
| HDAC11   | FGFR1OP2 | -0.63075256 | 0.53035235  | 1.16110491  | 1.16110491 |
| C10orf54 | KANK4    | 0.740663    | -0.42036074 | -1.16102374 | 1.16102374 |
| DDB2     | ARPC1B   | -0.35592726 | 0.80492336  | 1.16085062  | 1.16085062 |
| ADAMTS2  | ENOSF1   | -0.5664575  | 0.59430796  | 1.16076546  | 1.16076546 |
| ALDH3A2  | MFAP3    | -0.64425015 | 0.5164965   | 1.16074665  | 1.16074665 |
| USP9X    | MALT1    | -0.80719745 | 0.35338166  | 1.16057911  | 1.16057911 |
| EPS15    | MRPL47   | -0.79857576 | 0.3619188   | 1.16049456  | 1.16049456 |
| CSTF3    | TOP2A    | 0.6826116   | -0.47755593 | -1.16016753 | 1.16016753 |
| APOE     | SPINK1   | 0.68262583  | -0.47749218 | -1.16011801 | 1.16011801 |
| PDZRN3   | CBLN2    | 0.40470254  | -0.75532603 | -1.16002857 | 1.16002857 |

|          |          |             |             |             |            |
|----------|----------|-------------|-------------|-------------|------------|
| GEMIN4   | ZNF202   | -0.4898532  | 0.6701468   | 1.16        | 1.16       |
| EIF4G3   | URB2     | 0.84688807  | -0.31303042 | -1.15991849 | 1.15991849 |
| RAE1     | NXF1     | -0.3099789  | 0.84992075  | 1.15989965  | 1.15989965 |
| PCDH9    | SLC25A29 | 0.52988946  | -0.6300068  | -1.15989626 | 1.15989626 |
| ESRRG    | APOD     | -0.6827962  | 0.47703657  | 1.15983277  | 1.15983277 |
| POSTN    | NUDCD2   | -0.4658458  | 0.6939619   | 1.1598077   | 1.1598077  |
| MCM3     | OPTN     | -0.511448   | 0.648262    | 1.15971     | 1.15971    |
| PPP1R1B  | CDK5     | -0.68484825 | 0.4748244   | 1.15967265  | 1.15967265 |
| ARHGEF12 | EPDR1    | -0.72103983 | 0.43822515  | 1.15926498  | 1.15926498 |
| ESRRG    | MLC1     | 0.71634066  | -0.4426236  | -1.15896426 | 1.15896426 |
| QSOX1    | RTN3     | 0.5793108   | -0.57962424 | -1.15893504 | 1.15893504 |
| SET      | RANGAP1  | 0.6226386   | -0.5360075  | -1.1586461  | 1.1586461  |
| GNAQ     | AGPAT5   | -0.46876568 | 0.68987596  | 1.15864164  | 1.15864164 |
| CCT3     | PFDN4    | 0.41293752  | -0.7455363  | -1.15847382 | 1.15847382 |
| MFAP3    | BMP15    | 0.29338932  | -0.86495835 | -1.15834767 | 1.15834767 |
| PCNA     | KIF11    | 0.86782664  | -0.29046902 | -1.15829566 | 1.15829566 |
| PPP1CA   | EGR1     | 0.46060142  | -0.69741565 | -1.15801707 | 1.15801707 |
| KCNAB1   | TIMELESS | -0.74853075 | 0.4092195   | 1.15775025  | 1.15775025 |
| CSNK2A1  | MAP4     | -0.59042674 | 0.5670053   | 1.15743204  | 1.15743204 |
| PCNA     | ITCH     | -0.64811224 | 0.50884974  | 1.15696198  | 1.15696198 |
| TRIAP1   | DHRS12   | -0.7613323  | 0.3954438   | 1.1567761   | 1.1567761  |
| CFH      | LEPR     | 0.55297995  | -0.6037897  | -1.15676965 | 1.15676965 |
| ARNTL    | C12orf49 | -0.43920115 | 0.7172291   | 1.15643025  | 1.15643025 |
| ENO3     | CST2     | 0.5254184   | -0.6307058  | -1.1561242  | 1.1561242  |
| PPCDC    | ZC3H3    | -0.31904677 | 0.83617926  | 1.15522603  | 1.15522603 |
| SRGAP1   | TM4SF18  | -0.47496065 | 0.6801488   | 1.15510945  | 1.15510945 |
| MMS19    | RAB35    | -0.7690072  | 0.38565513  | 1.15466233  | 1.15466233 |
| ALAD     | GALNT2   | -0.48295513 | 0.67143     | 1.15438513  | 1.15438513 |
| SRSF1    | NXF1     | -0.57557195 | 0.5786942   | 1.15426615  | 1.15426615 |
| EIF4A1   | CASP5    | 0.4744811   | -0.67943    | -1.1539111  | 1.1539111  |
| CAP2     | NAB2     | 0.55788994  | -0.595908   | -1.15379794 | 1.15379794 |
| GSTP1    | OLMALINC | -0.57692623 | 0.5763334   | 1.15325963  | 1.15325963 |
| STXBP6   | OSBPL7   | 0.47326636  | -0.67992336 | -1.15318972 | 1.15318972 |
| MPPED2   | TIMELESS | -0.4121234  | 0.74092376  | 1.15304716  | 1.15304716 |
| ESRRG    | MID2     | -0.45287892 | 0.7001661   | 1.15304502  | 1.15304502 |
| TOP2A    | HDAC1    | 0.72864985  | -0.424231   | -1.15288085 | 1.15288085 |
| RNF25    | PHF8     | -0.6656287  | 0.48663554  | 1.15226424  | 1.15226424 |
| ADAMTS9  | FAT3     | -0.615138   | 0.5369323   | 1.1520703   | 1.1520703  |
| COPZ1    | KATNAL1  | -0.566457   | 0.58545107  | 1.15190807  | 1.15190807 |
| NAP1L1   | SERBP1   | -0.44640467 | 0.7054672   | 1.15187187  | 1.15187187 |
| GSTP1    | ZWINT    | -0.5672679  | 0.58431834  | 1.15158624  | 1.15158624 |
| IPO11    | GALNS    | -0.50724787 | 0.64428645  | 1.15153432  | 1.15153432 |
| LDLRAD4  | GET4     | -0.57808375 | 0.5731146   | 1.15119835  | 1.15119835 |
| MED31    | SLC27A3  | -0.3807501  | 0.7702062   | 1.1509563   | 1.1509563  |
| PARK2    | PPA1     | -0.41746423 | 0.732859    | 1.15032323  | 1.15032323 |
| RCC2     | HLA-B    | -0.53295356 | 0.61733496  | 1.15028852  | 1.15028852 |
| SOX4     | DPP3     | -0.68549836 | 0.4647121   | 1.15021046  | 1.15021046 |
| KCNAB1   | COL1A1   | 0.5467718   | -0.60329264 | -1.15006444 | 1.15006444 |
| XPO5     | PFDN4    | 0.54854584  | -0.60141784 | -1.14996368 | 1.14996368 |
| USP4     | RAB13    | 0.75192463  | -0.397662   | -1.14958663 | 1.14958663 |
| APOE     | RMI1     | -0.66333586 | 0.4862168   | 1.14955266  | 1.14955266 |
| ALDH4A1  | DFNB31   | 0.4930366   | -0.6560589  | -1.1490955  | 1.1490955  |
| XRCC5    | RGS5     | -0.6820114  | 0.4670268   | 1.1490382   | 1.1490382  |
| SRSF1    | RBM17    | -0.55379677 | 0.59519684  | 1.14899361  | 1.14899361 |
| HDAC11   | BID      | -0.73573256 | 0.4132407   | 1.14897326  | 1.14897326 |



|           |          |             |             |             |            |
|-----------|----------|-------------|-------------|-------------|------------|
| RNF24     | EGR1     | 0.6370687   | -0.5118646  | -1.1489333  | 1.1489333  |
| GSTM4     | ZNF358   | 0.59605324  | -0.5525411  | -1.14859434 | 1.14859434 |
| NEGR1     | HELLS    | 0.58985794  | -0.55873114 | -1.14858908 | 1.14858908 |
| RDH11     | ARHGEF2  | -0.5976784  | 0.5508427   | 1.1485211   | 1.1485211  |
| EIF5      | ETNPPL   | 0.5874218   | -0.56108534 | -1.14850714 | 1.14850714 |
| AMIGO1    | CBLN2    | 0.6346142   | -0.51389277 | -1.14850697 | 1.14850697 |
| GRB14     | QSOX1    | 0.4746355   | -0.6737962  | -1.1484317  | 1.1484317  |
| XXYL1     | B4GALT6  | -0.50606215 | 0.642363    | 1.14842515  | 1.14842515 |
| EPHX2     | ZNF202   | -0.50562286 | 0.64274395  | 1.14836681  | 1.14836681 |
| SERBP1    | EPHA1    | 0.65204304  | -0.4961538  | -1.14819684 | 1.14819684 |
| PDE4DIP   | QSOX1    | 0.57057023  | -0.5774797  | -1.14804993 | 1.14804993 |
| PCDH9     | SOX4     | 0.5171338   | -0.6307498  | -1.1478836  | 1.1478836  |
| RBM17     | SS18L2   | -0.7839526  | 0.36388013  | 1.14783273  | 1.14783273 |
| MMD       | PRICKLE1 | 0.43207446  | -0.71557486 | -1.14764932 | 1.14764932 |
| STXBP6    | XPNPEP1  | 0.44023138  | -0.70739335 | -1.14762473 | 1.14762473 |
| MCM3      | HLA-B    | -0.35771003 | 0.78977287  | 1.1474829   | 1.1474829  |
| ZBTB10    | SOBP     | 0.7882373   | -0.35916406 | -1.14740136 | 1.14740136 |
| B2M       | MED14    | -0.4739867  | 0.6733753   | 1.147362    | 1.147362   |
| SAP30L    | STAT3    | -0.48826304 | 0.6587151   | 1.14697814  | 1.14697814 |
| STX8      | RACGAP1  | -0.72435915 | 0.4225021   | 1.14686125  | 1.14686125 |
| SNRPB2    | PDE7A    | 0.6246586   | -0.5220099  | -1.1466685  | 1.1466685  |
| SLC39A1   | FOS      | 0.6978758   | -0.44874978 | -1.14662558 | 1.14662558 |
| UNC5C     | IL15RA   | -0.39761215 | 0.74876374  | 1.14637589  | 1.14637589 |
| KIF13A    | GSTM5    | 0.78473055  | -0.36142126 | -1.14615181 | 1.14615181 |
| EPS15     | GAPDH    | -0.73043734 | 0.4155373   | 1.14597464  | 1.14597464 |
| TMEM144   | MED15    | -0.6635963  | 0.48223728  | 1.14583358  | 1.14583358 |
| CEP68     | TMEM229B | -0.5993074  | 0.5464487   | 1.1457561   | 1.1457561  |
| ZNF467    | DNAJC9   | -0.557622   | 0.58764917  | 1.14527117  | 1.14527117 |
| COL3A1    | SLC25A13 | -0.5375969  | 0.60761285  | 1.14520975  | 1.14520975 |
| ARPC5L    | CSRP2BP  | -0.65855473 | 0.48565644  | 1.14421117  | 1.14421117 |
| LOC145783 | KIAA0232 | -0.5342275  | 0.60994065  | 1.14416815  | 1.14416815 |
| NFIA      | PSMA4    | -0.6866289  | 0.4572912   | 1.1439201   | 1.1439201  |
| GAPDH     | NNMT     | 0.65054226  | -0.49321216 | -1.14375442 | 1.14375442 |
| PCNA      | EBF1     | -0.90139437 | 0.24223669  | 1.14363106  | 1.14363106 |
| CCT6A     | PFDN4    | 0.5090917   | -0.63450265 | -1.14359435 | 1.14359435 |
| RARA      | ARNTL    | -0.6977274  | 0.445814    | 1.1435414   | 1.1435414  |
| RGS5      | C1QTNF3  | 0.6481938   | -0.49470606 | -1.14289986 | 1.14289986 |
| AUP1      | TEAD4    | -0.4214954  | 0.72132355  | 1.14281895  | 1.14281895 |
| LMO3      | PRUNE2   | 0.4290495   | -0.7137661  | -1.1428156  | 1.1428156  |
| IFNAR2    | CUX1     | -0.3026688  | 0.83997107  | 1.14263987  | 1.14263987 |
| LAMA1     | FAT3     | -0.7019609  | 0.44064045  | 1.14260135  | 1.14260135 |
| AKAP10    | POU2F2   | 0.29777786  | -0.8446985  | -1.14247636 | 1.14247636 |
| ARNTL     | PHLDB2   | 0.5701411   | -0.57225686 | -1.14239796 | 1.14239796 |
| LMO3      | DPAGT1   | -0.8320947  | 0.31029812  | 1.14239282  | 1.14239282 |
| ITGB5     | PDLIM4   | 0.46718037  | -0.6751796  | -1.14235997 | 1.14235997 |
| EPS15     | EIF2B2   | -0.4028363  | 0.73950815  | 1.14234445  | 1.14234445 |
| LDLRAD4   | MFAP3    | -0.3023387  | 0.8399222   | 1.1422609   | 1.1422609  |
| IP6K2     | IRF9     | -0.4166994  | 0.7255336   | 1.142233    | 1.142233   |
| HSD17B1   | HSD11B1  | -0.5437215  | 0.59811795  | 1.14183945  | 1.14183945 |
| ADAM10    | CTNNA1   | -0.52761173 | 0.6141549   | 1.14176663  | 1.14176663 |
| SLC7A2    | COPRS    | 0.47990996  | -0.6618161  | -1.14172606 | 1.14172606 |
| GSTM1     | GSTM5    | 0.8144388   | -0.32727993 | -1.14171873 | 1.14171873 |
| PARK2     | PTPN4    | -0.5985422  | 0.54295677  | 1.14149897  | 1.14149897 |
| CXCL2     | STAT3    | 0.6000699   | -0.5413514  | -1.1414213  | 1.1414213  |
| AIDA      | VPS16    | 0.6559119   | -0.48493427 | -1.14084617 | 1.14084617 |

|          |          |             |             |             |            |
|----------|----------|-------------|-------------|-------------|------------|
| FAT3     | DDX39A   | -0.6319506  | 0.5087327   | 1.1406833   | 1.1406833  |
| PIK3CA   | COL5A1   | 0.53357166  | -0.6070694  | -1.14064106 | 1.14064106 |
| QKI      | DIEXF    | -0.55084234 | 0.58976936  | 1.1406117   | 1.1406117  |
| YARS     | MCM4     | 0.69372547  | -0.44680056 | -1.14052603 | 1.14052603 |
| RERGL    | NUDCD2   | -0.6100757  | 0.53041106  | 1.14048676  | 1.14048676 |
| COPZ1    | TM4SF18  | -0.39079294 | 0.74965733  | 1.14045027  | 1.14045027 |
| AIDA     | CERS5    | 0.47936916  | -0.6609588  | -1.14032796 | 1.14032796 |
| CYP2F1   | CXCL1    | -0.82462996 | 0.3156184   | 1.14024836  | 1.14024836 |
| CLIP1    | GPC1     | 0.7214304   | -0.4187191  | -1.1401495  | 1.1401495  |
| PRUNE2   | MADD     | -0.5536811  | 0.5864534   | 1.1401345   | 1.1401345  |
| URI1     | FBXO9    | 0.7017003   | -0.43823206 | -1.13993236 | 1.13993236 |
| GNAL     | ARPP21   | -0.5579378  | 0.5816815   | 1.1396193   | 1.1396193  |
| GPC1     | PINK1    | 0.54215986  | -0.59729266 | -1.13945252 | 1.13945252 |
| ZNF385D  | ZNF148   | -0.52181053 | 0.6176165   | 1.13942703  | 1.13942703 |
| HDAC11   | SPCS3    | -0.7052256  | 0.4339452   | 1.1391708   | 1.1391708  |
| SNRPB2   | SNTB1    | -0.6307162  | 0.508367    | 1.1390832   | 1.1390832  |
| UBC      | HDAC1    | -0.634058   | 0.5047849   | 1.1388429   | 1.1388429  |
| ZDHHC14  | PGRMC2   | 0.49820885  | -0.6403781  | -1.13858695 | 1.13858695 |
| ASB1     | DNAJC9   | -0.3834596  | 0.7550266   | 1.1384862   | 1.1384862  |
| NFATC2IP | BMP1     | -0.4686302  | 0.6697845   | 1.1384147   | 1.1384147  |
| TRIT1    | KALRN    | -0.3465579  | 0.79155225  | 1.13811015  | 1.13811015 |
| CASP6    | ZNF385D  | -0.74790895 | 0.38950187  | 1.13741082  | 1.13741082 |
| DFNB31   | TRNP1    | -0.416827   | 0.72051907  | 1.13734607  | 1.13734607 |
| CYBRD1   | AGPAT5   | -0.59178406 | 0.5455309   | 1.13731496  | 1.13731496 |
| KARS     | AHNAK    | -0.78242654 | 0.3547428   | 1.13716934  | 1.13716934 |
| CTNNA1   | TRO      | -0.65859157 | 0.47834104  | 1.13693261  | 1.13693261 |
| DBI      | PRUNE2   | 0.6851332   | -0.45150426 | -1.13663746 | 1.13663746 |
| EPS15    | CCT3     | -0.65270823 | 0.48376718  | 1.13647541  | 1.13647541 |
| PDE4DIP  | COPZ1    | -0.6099899  | 0.52645797  | 1.13644787  | 1.13644787 |
| KDR      | ZSCAN20  | -0.65952885 | 0.47688952  | 1.13641837  | 1.13641837 |
| DKC1     | IGF2R    | -0.7505311  | 0.38575688  | 1.13628798  | 1.13628798 |
| PDE9A    | LAGE3    | -0.7517738  | 0.38443324  | 1.13620704  | 1.13620704 |
| UCK2     | XXYL1    | 0.81681436  | -0.31936178 | -1.13617614 | 1.13617614 |
| STX7     | SIRPA    | 0.47444534  | -0.66164446 | -1.1360898  | 1.1360898  |
| KANK1    | C1orf131 | -0.5872476  | 0.54881376  | 1.13606136  | 1.13606136 |
| ZBTB10   | PNPT1    | -0.48682344 | 0.6491506   | 1.13597404  | 1.13597404 |
| SET      | RRN3     | -0.47598445 | 0.6598715   | 1.13585595  | 1.13585595 |
| SMYD3    | FASTKD1  | -0.47754773 | 0.6578913   | 1.13543903  | 1.13543903 |
| MAPK10   | DDX28    | -0.41599435 | 0.71929973  | 1.13529408  | 1.13529408 |
| USP9X    | STX6     | -0.46326324 | 0.67200565  | 1.13526889  | 1.13526889 |
| SFN      | RPS2     | 0.6195587   | -0.51567465 | -1.13523335 | 1.13523335 |
| DCUN1D5  | UNC5C    | -0.5443721  | 0.5907842   | 1.1351563   | 1.1351563  |
| FTL      | RSPO3    | -0.6523495  | 0.4827626   | 1.1351121   | 1.1351121  |
| XRCC5    | ST13     | -0.5314729  | 0.602935    | 1.1344079   | 1.1344079  |
| CEACAM1  | ARPP19   | -0.24685712 | 0.88734627  | 1.13420339  | 1.13420339 |
| PSMA4    | EBF1     | -0.7309841  | 0.40315396  | 1.13413806  | 1.13413806 |
| C10orf11 | MRPL47   | -0.46728003 | 0.6667803   | 1.13406033  | 1.13406033 |
| ZWINT    | KATNAL1  | -0.69113505 | 0.4427822   | 1.13391725  | 1.13391725 |
| RUFY3    | RMI1     | -0.80906034 | 0.3246371   | 1.13369744  | 1.13369744 |
| ANAPC5   | KIRREL   | -0.26167244 | 0.87176037  | 1.13343281  | 1.13343281 |
| ZBTB10   | MSRB1    | -0.69867396 | 0.43466866  | 1.13334262  | 1.13334262 |
| MFAP3    | SMOX     | 0.29790977  | -0.83538514 | -1.13329491 | 1.13329491 |
| NAB2     | OXR1     | 0.6971282   | -0.4361048  | -1.133233   | 1.133233   |
| COMTD1   | METTL3   | -0.7782576  | 0.3549531   | 1.1332107   | 1.1332107  |
| CYBRD1   | PBXIP1   | 0.61696756  | -0.51593876 | -1.13290632 | 1.13290632 |

|          |          |             |             |             |            |
|----------|----------|-------------|-------------|-------------|------------|
| SSB      | ATF6B    | 0.6079152   | -0.52494735 | -1.13286255 | 1.13286255 |
| DDX6     | MOCOS    | -0.75473726 | 0.37804753  | 1.13278479  | 1.13278479 |
| NOVA1    | SLAMF1   | -0.7421208  | 0.3905548   | 1.1326756   | 1.1326756  |
| FOXN3    | BID      | -0.7600835  | 0.3725654   | 1.1326489   | 1.1326489  |
| APC      | TRMT1    | -0.51154655 | 0.6210714   | 1.13261795  | 1.13261795 |
| SLC26A7  | ZNF467   | 0.5796991   | -0.5528763  | -1.1325754  | 1.1325754  |
| GSTM3    | SPAG16   | 0.7052215   | -0.42716068 | -1.13238218 | 1.13238218 |
| VCAM1    | SEPT11   | 0.52393156  | -0.6083982  | -1.13232976 | 1.13232976 |
| LZTS1    | ADPGK    | -0.5322816  | 0.60000056  | 1.13228216  | 1.13228216 |
| SF3B3    | SOX4     | -0.5731519  | 0.55906194  | 1.13221384  | 1.13221384 |
| HINFP    | ZNF704   | 0.55269563  | -0.57949    | -1.13218563 | 1.13218563 |
| XRCC5    | SPEF2    | 0.33801693  | -0.7940226  | -1.13203953 | 1.13203953 |
| KLF12    | C3orf17  | 0.24444143  | -0.88751316 | -1.13195459 | 1.13195459 |
| USP4     | PIK3IP1  | -0.6369051  | 0.49503773  | 1.13194283  | 1.13194283 |
| KDR      | MUTYH    | -0.51235974 | 0.6193598   | 1.13171954  | 1.13171954 |
| UNC5C    | EIF4E3   | -0.46565974 | 0.6659232   | 1.13158294  | 1.13158294 |
| SRSF1    | TMEM163  | -0.65805143 | 0.4734692   | 1.13152063  | 1.13152063 |
| CCT6A    | INIP     | 0.6225192   | -0.5089921  | -1.1315113  | 1.1315113  |
| NAP1L1   | PEX5     | -0.49201137 | 0.63946354  | 1.13147491  | 1.13147491 |
| S100A8   | TM9SF3   | -0.8613403  | 0.2699708   | 1.1313111   | 1.1313111  |
| PCNA     | TK1      | 0.8228824   | -0.30838484 | -1.13126724 | 1.13126724 |
| FGFR1OP  | GRM5     | 0.33630943  | -0.7948636  | -1.13117303 | 1.13117303 |
| PDZRN3   | PRICKLE1 | 0.6236975   | -0.50745404 | -1.13115154 | 1.13115154 |
| NDN      | PIR      | -0.37358317 | 0.7574358   | 1.13101897  | 1.13101897 |
| NOD1     | PHF8     | -0.3360022  | 0.7949799   | 1.1309821   | 1.1309821  |
| ENSA     | LMBRD2   | -0.63105834 | 0.49982527  | 1.13088361  | 1.13088361 |
| WNK1     | CADM1    | -0.49021128 | 0.64046866  | 1.13067994  | 1.13067994 |
| SRPRB    | COL6A3   | -0.5655853  | 0.56490093  | 1.13048623  | 1.13048623 |
| ATP5G1   | SLC25A22 | 0.74318594  | -0.38724834 | -1.13043428 | 1.13043428 |
| PRKRIR   | FZD10    | 0.5740327   | -0.5562316  | -1.1302643  | 1.1302643  |
| CSRNP1   | ADAMTSL3 | -0.53188175 | 0.5983693   | 1.13025105  | 1.13025105 |
| CFLAR    | LCMT2    | -0.38975763 | 0.74031174  | 1.13006937  | 1.13006937 |
| TPST2    | TUFM     | -0.35598665 | 0.7740523   | 1.13003895  | 1.13003895 |
| USP9X    | TOP3A    | -0.74056876 | 0.38931173  | 1.12988049  | 1.12988049 |
| SPTBN1   | SLC25A29 | 0.2643557   | -0.8654018  | -1.1297575  | 1.1297575  |
| RNF141   | MRPS22   | -0.3952176  | 0.73452985  | 1.12974745  | 1.12974745 |
| GNAQ     | DPAGT1   | -0.42268896 | 0.70694435  | 1.12963331  | 1.12963331 |
| TGM2     | KCNJ14   | 0.44685513  | -0.68271226 | -1.12956739 | 1.12956739 |
| URI1     | EIF2B2   | 0.47938132  | -0.65010625 | -1.12948757 | 1.12948757 |
| ARHGEF12 | ZHX2     | -0.8713973  | 0.25804472  | 1.12944202  | 1.12944202 |
| TRIT1    | MED15    | -0.7668978  | 0.36247414  | 1.12937194  | 1.12937194 |
| TMOD3    | LAMA1    | 0.7644256   | -0.36480615 | -1.12923175 | 1.12923175 |
| SH3RF1   | PRICKLE1 | 0.7206998   | -0.4083675  | -1.1290673  | 1.1290673  |
| TAOK3    | C11orf31 | -0.5723055  | 0.55674285  | 1.12904835  | 1.12904835 |
| ESRRG    | PTTG1    | 0.58200264  | -0.5458637  | -1.12786634 | 1.12786634 |
| UNC5C    | EYA2     | -0.39259565 | 0.7351749   | 1.12777055  | 1.12777055 |
| ZDHHC14  | SPTBN1   | 0.36601388  | -0.7617223  | -1.12773618 | 1.12773618 |
| USP4     | PHF8     | -0.46274564 | 0.6643198   | 1.12706544  | 1.12706544 |
| COMMD3   | ALS2     | -0.65942615 | 0.46762642  | 1.12705257  | 1.12705257 |
| KLF12    | PLIN2    | 0.46273768  | -0.66431105 | -1.12704873 | 1.12704873 |
| PPP1CA   | ARNTL    | -0.4130256  | 0.7139383   | 1.1269639   | 1.1269639  |
| ADAMTS2  | CEP112   | 0.6400124   | -0.48662952 | -1.12664192 | 1.12664192 |
| XRCC5    | MYOM1    | -0.8924479  | 0.23383601  | 1.12628391  | 1.12628391 |
| SMC4     | FOXN1    | 0.8803084   | -0.24588135 | -1.12618975 | 1.12618975 |
| XRCC5    | RAB27A   | 0.66764253  | -0.45821756 | -1.12586009 | 1.12586009 |

|         |          |             |             |             |            |
|---------|----------|-------------|-------------|-------------|------------|
| MVP     | EGR1     | 0.42920968  | -0.6966332  | -1.12584288 | 1.12584288 |
| TRIO    | SERPINE2 | -0.6653005  | 0.460458    | 1.1257585   | 1.1257585  |
| SAP30L  | PTDSS1   | -0.6952489  | 0.430162    | 1.1254109   | 1.1254109  |
| USB1    | P4HTM    | -0.55986303 | 0.56542504  | 1.12528807  | 1.12528807 |
| TUFM    | CFLAR    | -0.3440239  | 0.7812446   | 1.1252685   | 1.1252685  |
| MAP4K4  | KIF5B    | 0.9213858   | -0.20386091 | -1.12524671 | 1.12524671 |
| TEFM    | PHF8     | -0.2520188  | 0.8730968   | 1.1251156   | 1.1251156  |
| CDK6    | NEGR1    | -0.53276855 | 0.5922269   | 1.12499545  | 1.12499545 |
| KIF11   | TDRKH    | 0.566977    | -0.55791175 | -1.12488875 | 1.12488875 |
| MOCS2   | COL6A3   | 0.67372596  | -0.45105097 | -1.12477693 | 1.12477693 |
| UBC     | DPAGT1   | -0.44108742 | 0.6836111   | 1.12469852  | 1.12469852 |
| MCM6    | ADGRA2   | -0.6794518  | 0.44438645  | 1.12383825  | 1.12383825 |
| PPP3CB  | CNOT11   | -0.47362438 | 0.65018284  | 1.12380722  | 1.12380722 |
| PLOD3   | P4HTM    | -0.4091011  | 0.7145684   | 1.1236695   | 1.1236695  |
| SRSF1   | NID2     | -0.4202769  | 0.7032825   | 1.1235594   | 1.1235594  |
| GATAD1  | MAD2L1BP | 0.37162483  | -0.7516285  | -1.12325333 | 1.12325333 |
| NUB1    | PER3     | -0.568129   | 0.55496514  | 1.12309414  | 1.12309414 |
| GSTP1   | RMI1     | -0.46952736 | 0.65353674  | 1.1230641   | 1.1230641  |
| XPO1    | ZWILCH   | -0.3493971  | 0.7736436   | 1.1230407   | 1.1230407  |
| EZH2    | TOP2A    | 0.9200974   | -0.20291199 | -1.12300939 | 1.12300939 |
| ZNF106  | MYL12A   | -0.667963   | 0.45492303  | 1.12288603  | 1.12288603 |
| POSTN   | PPIL2    | -0.4572314  | 0.6655928   | 1.1228242   | 1.1228242  |
| SGCB    | STX6     | -0.61368513 | 0.5091123   | 1.12279743  | 1.12279743 |
| USP4    | NXF1     | -0.6068722  | 0.5157963   | 1.1226685   | 1.1226685  |
| GTF2I   | NIPA2    | -0.5681642  | 0.5544942   | 1.1226584   | 1.1226584  |
| NFIB    | CDCA7    | -0.38508135 | 0.7375575   | 1.12263885  | 1.12263885 |
| RAB4A   | MALT1    | -0.6640736  | 0.45848304  | 1.12255664  | 1.12255664 |
| PCNA    | WBP4     | -0.4142487  | 0.70819056  | 1.12243926  | 1.12243926 |
| IPO11   | PDE7A    | 0.53529584  | -0.58708745 | -1.12238329 | 1.12238329 |
| GNPTAB  | TIRAP    | -0.48869073 | 0.63363916  | 1.12232989  | 1.12232989 |
| TNC     | LOX      | 0.66996866  | -0.45230088 | -1.12226954 | 1.12226954 |
| TRO     | DPP6     | 0.6505287   | -0.4717273  | -1.122256   | 1.122256   |
| CASP6   | CEACAM1  | -0.6031079  | 0.5189782   | 1.1220861   | 1.1220861  |
| GEM     | DDAH2    | 0.84802586  | -0.27388868 | -1.12191454 | 1.12191454 |
| TRIM25  | DCAF8    | -0.2875623  | 0.83428013  | 1.12184243  | 1.12184243 |
| SRPRB   | MRPS14   | -0.31723398 | 0.804539    | 1.12177298  | 1.12177298 |
| MAP4K4  | MYL12A   | 0.23769654  | -0.88372785 | -1.12142439 | 1.12142439 |
| LAMA1   | COL6A3   | -0.5657195  | 0.5556284   | 1.1213479   | 1.1213479  |
| SEC62   | SOX4     | 0.4286253   | -0.69246584 | -1.12109114 | 1.12109114 |
| CTNNA1  | PALMD    | 0.33246347  | -0.7886147  | -1.12107817 | 1.12107817 |
| APC     | ZWINT    | -0.28098065 | 0.8400697   | 1.12105035  | 1.12105035 |
| KIF5B   | MUTYH    | 0.38235688  | -0.738514   | -1.12087088 | 1.12087088 |
| RELB    | C1QBP    | 0.4056167   | -0.71522164 | -1.12083834 | 1.12083834 |
| KATNAL1 | CNOT11   | -0.43312544 | 0.68765     | 1.12077544  | 1.12077544 |
| IL2     | SERPINH1 | 0.5195437   | -0.60098195 | -1.12052565 | 1.12052565 |
| BGN     | CYR61    | 0.66449624  | -0.4559034  | -1.12039964 | 1.12039964 |
| MITF    | GPR155   | -0.5610565  | 0.5593304   | 1.1203869   | 1.1203869  |
| NFE2L1  | MICALL1  | -0.36308724 | 0.7570519   | 1.12013914  | 1.12013914 |
| WWC1    | LMOD3    | -0.6587433  | 0.46138453  | 1.12012783  | 1.12012783 |
| LARP6   | TRO      | 0.40539902  | -0.7143764  | -1.11977542 | 1.11977542 |
| SLC26A7 | CBLN2    | 0.58593476  | -0.5337107  | -1.11964546 | 1.11964546 |
| SAP30L  | MTHFD1L  | -0.53122556 | 0.58840007  | 1.11962563  | 1.11962563 |
| LAMA1   | COL5A1   | -0.40478745 | 0.7146711   | 1.11945855  | 1.11945855 |
| SNRPB2  | C8orf34  | -0.74791545 | 0.37143376  | 1.11934921  | 1.11934921 |
| PCBP2   | DDX56    | 0.57266414  | -0.54666054 | -1.11932468 | 1.11932468 |

|          |          |             |             |             |            |
|----------|----------|-------------|-------------|-------------|------------|
| OPRK1    | NEDD4L   | -0.6309453  | 0.48837182  | 1.11931712  | 1.11931712 |
| TIAL1    | ZBTB44   | 0.49006957  | -0.6291051  | -1.11917467 | 1.11917467 |
| AKAP10   | NOL10    | -0.45154223 | 0.6675367   | 1.11907893  | 1.11907893 |
| RALBP1   | CLASP2   | 0.42435616  | -0.69464976 | -1.11900592 | 1.11900592 |
| MFAP3    | RTN1     | -0.37426382 | 0.7446095   | 1.11887332  | 1.11887332 |
| TOP2A    | DNMT1    | 0.6709932   | -0.44785297 | -1.11884617 | 1.11884617 |
| KARS     | ALAD     | -0.52936184 | 0.58945954  | 1.11882138  | 1.11882138 |
| NFIA     | FARSA    | -0.6645243  | 0.45410666  | 1.11863096  | 1.11863096 |
| ABCG1    | TEX10    | -0.74455565 | 0.37405452  | 1.11861017  | 1.11861017 |
| NUDCD2   | FAM104B  | 0.66358286  | -0.45487377 | -1.11845663 | 1.11845663 |
| XRCC5    | CD48     | 0.71854156  | -0.39971268 | -1.11825424 | 1.11825424 |
| ABCG1    | NAT10    | -0.56166935 | 0.556433    | 1.11810235  | 1.11810235 |
| GTF2I    | ATP5G1   | -0.6610548  | 0.45701832  | 1.11807312  | 1.11807312 |
| MAPK10   | PDHB     | -0.36461788 | 0.7530745   | 1.11769238  | 1.11769238 |
| CWF19L2  | XXYL1    | -0.75522155 | 0.3624661   | 1.11768765  | 1.11768765 |
| TEAD4    | FOS      | 0.6803981   | -0.43715927 | -1.11755737 | 1.11755737 |
| CCT6A    | PPA1     | 0.82732904  | -0.2900238  | -1.11735284 | 1.11735284 |
| BMP15    | TRMT1    | 0.28049842  | -0.8368442  | -1.11734262 | 1.11734262 |
| FOXN3    | BMP1     | 0.38640952  | -0.730733   | -1.11714252 | 1.11714252 |
| SIRT7    | PELP1    | 0.31591538  | -0.8010819  | -1.11699728 | 1.11699728 |
| RBCK1    | KCNRG    | 0.65722334  | -0.45961252 | -1.11683586 | 1.11683586 |
| AK2      | ZHX3     | -0.3959509  | 0.72081524  | 1.11676614  | 1.11676614 |
| NTRK2    | SSB      | -0.6127758  | 0.5039728   | 1.1167486   | 1.1167486  |
| KATNAL1  | NELFCD   | -0.5515645  | 0.56514525  | 1.11670975  | 1.11670975 |
| ABI2     | HTATSF1  | 0.43066204  | -0.68601036 | -1.1166724  | 1.1166724  |
| POPDC3   | OPTN     | -0.61364657 | 0.5026849   | 1.11633147  | 1.11633147 |
| SNRPB2   | RGS22    | -0.5559868  | 0.5601941   | 1.1161809   | 1.1161809  |
| SERBP1   | TOP2A    | 0.8048916   | -0.31118912 | -1.11608072 | 1.11608072 |
| KIAA0101 | COL1A1   | -0.52437705 | 0.5913987   | 1.11577575  | 1.11577575 |
| ZSCAN20  | VSIG1    | 0.54380625  | -0.57167643 | -1.11548268 | 1.11548268 |
| YME1L1   | AK9      | 0.47880617  | -0.63666534 | -1.11547151 | 1.11547151 |
| CXCR4    | COL15A1  | -0.59120715 | 0.5242562   | 1.11546335  | 1.11546335 |
| SPCS3    | ANKRD28  | -0.354542   | 0.76068467  | 1.11522667  | 1.11522667 |
| LIG3     | SNX29    | -0.6329619  | 0.4821287   | 1.1150906   | 1.1150906  |
| SH3D19   | LMBRD2   | -0.53932196 | 0.57565933  | 1.11498129  | 1.11498129 |
| RGS5     | MUTYH    | -0.504653   | 0.6102097   | 1.1148627   | 1.1148627  |
| RUFY3    | NDFIP2   | -0.6085199  | 0.5061176   | 1.1146375   | 1.1146375  |
| NEGR1    | NDFIP2   | 0.85021955  | -0.26427695 | -1.1144965  | 1.1144965  |
| MDM1     | LMOD3    | 0.67617935  | -0.4382559  | -1.11443525 | 1.11443525 |
| APC      | XPO5     | -0.5323083  | 0.5820152   | 1.1143235   | 1.1143235  |
| TBL1XR1  | MLST8    | 0.44174793  | -0.67253107 | -1.114279   | 1.114279   |
| C4A      | MFSD12   | -0.63765174 | 0.47636136  | 1.1140131   | 1.1140131  |
| ANKRD35  | TANC2    | 0.44981924  | -0.66402555 | -1.11384479 | 1.11384479 |
| RNF130   | NT5DC1   | -0.44506335 | 0.66873145  | 1.1137948   | 1.1137948  |
| VPS16    | CEP112   | 0.51152223  | -0.60205567 | -1.1135779  | 1.1135779  |
| ESRRG    | PVR      | 0.7541373   | -0.3593888  | -1.1135261  | 1.1135261  |
| PRR14L   | PHF8     | -0.5912207  | 0.5222675   | 1.1134882   | 1.1134882  |
| KANK1    | PRICKLE1 | 0.52613926  | -0.5873488  | -1.11348806 | 1.11348806 |
| SOX4     | FAM129B  | -0.7335648  | 0.3798223   | 1.1133871   | 1.1133871  |
| UNC5C    | ADGRV1   | -0.6359052  | 0.47721922  | 1.11312442  | 1.11312442 |
| COL9A1   | ITGA8    | -0.46693596 | 0.64613444  | 1.1130704   | 1.1130704  |
| FOXN3    | PSMA4    | -0.6483671  | 0.4646596   | 1.1130267   | 1.1130267  |
| C12orf4  | STAMBPL1 | -0.2499736  | 0.86295563  | 1.11292923  | 1.11292923 |
| UNC5C    | C11orf63 | -0.51551235 | 0.5972312   | 1.11274355  | 1.11274355 |
| EPS15    | SOX4     | 0.58418655  | -0.52847075 | -1.1126573  | 1.1126573  |



|          |              |             |             |             |            |
|----------|--------------|-------------|-------------|-------------|------------|
| IDS      | BID          | -0.6878863  | 0.4246857   | 1.112572    | 1.112572   |
| MSR1     | ENOSF1       | -0.6495065  | 0.46299192  | 1.11249842  | 1.11249842 |
| FMO2     | CTNNA1       | 0.37373853  | -0.7387309  | -1.11246943 | 1.11246943 |
| CASP6    | MALT1        | -0.6552626  | 0.4567788   | 1.1120414   | 1.1120414  |
| PDGFC    | LMBRD2       | -0.49771747 | 0.61420333  | 1.1119208   | 1.1119208  |
| LAMA1    | CNTNAP1      | -0.3957782  | 0.7160822   | 1.1118604   | 1.1118604  |
| ARHGEF12 | SSPN         | -0.91196537 | 0.19987498  | 1.11184035  | 1.11184035 |
| RPL27A   | RPN2         | 0.5089794   | -0.60281783 | -1.11179723 | 1.11179723 |
| IP6K2    | NEGR1        | 0.5524746   | -0.559207   | -1.1116816  | 1.1116816  |
| ZBTB20   | C1orf131     | -0.69002897 | 0.42159963  | 1.1116286   | 1.1116286  |
| COL1A1   | ECM2         | 0.5056936   | -0.60564077 | -1.11133437 | 1.11133437 |
| NEGR1    | PNPT1        | 0.58121806  | -0.5300154  | -1.11123346 | 1.11123346 |
| DPAGT1   | TM9SF3       | -0.5024865  | 0.60847557  | 1.11096207  | 1.11096207 |
| RANGAP1  | PNPT1        | 0.58743787  | -0.52351886 | -1.11095673 | 1.11095673 |
| GMPS     | GSS          | 0.5788781   | -0.53188807 | -1.11076617 | 1.11076617 |
| TRPM3    | TPST2        | -0.82485974 | 0.2858924   | 1.11075214  | 1.11075214 |
| MAPKAP1  | GET4         | -0.51234984 | 0.59840006  | 1.1107499   | 1.1107499  |
| SP3      | HDAC1        | -0.43330374 | 0.6773109   | 1.11061464  | 1.11061464 |
| SCARB2   | GIPC1        | 0.50431967  | -0.6062013  | -1.11052097 | 1.11052097 |
| GTF3C2   | MTHFSD       | 0.2629797   | -0.84749097 | -1.11047067 | 1.11047067 |
| ESRRG    | PID1         | -0.69109595 | 0.41924796  | 1.11034391  | 1.11034391 |
| PPP6C    | LOC101060179 | 0.77733207  | -0.3328423  | -1.11017437 | 1.11017437 |
| KCND2    | KIAA0391     | -0.6014136  | 0.50842655  | 1.10984015  | 1.10984015 |
| HLF      | YME1L1       | 0.6068485   | -0.50285363 | -1.10970213 | 1.10970213 |
| IGF2R    | LAGE3        | -0.62079984 | 0.48883292  | 1.10963276  | 1.10963276 |
| TRIT1    | SMYD3        | -0.3451991  | 0.7642617   | 1.1094608   | 1.1094608  |
| SNTB2    | PGS1         | 0.5435248   | -0.5658277  | -1.1093525  | 1.1093525  |
| POPDC3   | FAM149A      | -0.5784731  | 0.53082037  | 1.10929347  | 1.10929347 |
| NIPAL2   | GPAT4        | -0.48873532 | 0.6205215   | 1.10925682  | 1.10925682 |
| GTF2H1   | ADCY1        | -0.71176094 | 0.39716643  | 1.10892737  | 1.10892737 |
| NFE2L1   | ARPC5L       | -0.745861   | 0.36297947  | 1.10884047  | 1.10884047 |
| UBC      | SVBP         | 0.5896746   | -0.5191626  | -1.1088372  | 1.1088372  |
| VPS33B   | MLST8        | -0.4795739  | 0.62919044  | 1.10876434  | 1.10876434 |
| YARS     | CST2         | 0.4269355   | -0.68166924 | -1.10860474 | 1.10860474 |
| NOL8     | ESRP2        | 0.58806103  | -0.5204917  | -1.10855273 | 1.10855273 |
| PSMB3    | RNASE4       | -0.54029167 | 0.56824654  | 1.10853821  | 1.10853821 |
| SSB      | LEPR         | -0.41202232 | 0.69633913  | 1.10836145  | 1.10836145 |
| AIG1     | SPIRE2       | -0.6336465  | 0.47457623  | 1.10822273  | 1.10822273 |
| SEH1L    | WDR13        | -0.61325246 | 0.49483678  | 1.10808924  | 1.10808924 |
| BRAP     | FAM43A       | -0.76897764 | 0.3391023   | 1.10807994  | 1.10807994 |
| MRPS22   | NET1         | -0.32656702 | 0.7813626   | 1.10792962  | 1.10792962 |
| PTGER3   | PBXIP1       | 0.7035441   | -0.40432832 | -1.10787242 | 1.10787242 |
| SP3      | ZNF704       | 0.42617965  | -0.68144774 | -1.10762739 | 1.10762739 |
| HDAC11   | CCT3         | -0.70223165 | 0.4053549   | 1.10758655  | 1.10758655 |
| TDRKH    | KIAA0232     | -0.8015102  | 0.30604595  | 1.10755615  | 1.10755615 |
| CSNK2A1  | THRB         | -0.34297064 | 0.7645322   | 1.10750284  | 1.10750284 |
| POLR2D   | NEGR1        | 0.6551444   | -0.4520929  | -1.1072373  | 1.1072373  |
| EIF4G3   | PTPN21       | 0.5074395   | -0.5996893  | -1.1071288  | 1.1071288  |
| MANF     | IL32         | 0.6997627   | -0.40732235 | -1.10708505 | 1.10708505 |
| CBS      | SERPINE2     | -0.5597397  | 0.5472537   | 1.1069934   | 1.1069934  |
| ESRRG    | NPR3         | -0.2580772  | 0.8488113   | 1.1068885   | 1.1068885  |
| XRCC5    | PPM1A        | -0.5800703  | 0.52670604  | 1.10677634  | 1.10677634 |
| RUFY3    | TUSC3        | -0.43516392 | 0.67157584  | 1.10673976  | 1.10673976 |
| CTNNA1   | LRRC16A      | -0.58339894 | 0.5230261   | 1.10642504  | 1.10642504 |
| MCM3     | CD48         | 0.6075954   | -0.49880737 | -1.10640277 | 1.10640277 |

|           |              |             |             |             |            |
|-----------|--------------|-------------|-------------|-------------|------------|
| SET       | KIRREL       | -0.7055112  | 0.40080148  | 1.10631268  | 1.10631268 |
| CTNNA1    | EFHD1        | 0.49597326  | -0.61012715 | -1.10610041 | 1.10610041 |
| HDAC11    | FAM216A      | -0.75503457 | 0.35096955  | 1.10600412  | 1.10600412 |
| UTP18     | DCAF7        | -0.5379704  | 0.5679213   | 1.1058917   | 1.1058917  |
| TUFM      | CRY2         | -0.6256237  | 0.48006207  | 1.10568577  | 1.10568577 |
| MVP       | JUN          | 0.5060352   | -0.5994051  | -1.1054403  | 1.1054403  |
| POLN      | RMDN1        | -0.57388276 | 0.53124464  | 1.1051274   | 1.1051274  |
| CCT3      | SYCP2        | -0.7417758  | 0.36332184  | 1.10509764  | 1.10509764 |
| HDAC11    | ADSL         | -0.5354228  | 0.5695562   | 1.104979    | 1.104979   |
| CLCN4     | HIST1H1D     | 0.55637884  | -0.54855186 | -1.1049307  | 1.1049307  |
| DIEXF     | TK1          | 0.5095507   | -0.5953017  | -1.1048524  | 1.1048524  |
| DCUN1D5   | NDN          | -0.4472023  | 0.65764505  | 1.10484735  | 1.10484735 |
| LPGAT1    | PRUNE2       | 0.6342781   | -0.47054955 | -1.10482765 | 1.10482765 |
| EIF4E     | QSOX1        | 0.46222296  | -0.6419051  | -1.10412806 | 1.10412806 |
| SH3PXD2A  | USP4         | 0.56821656  | -0.53590643 | -1.10412299 | 1.10412299 |
| RBPJ      | FZD8         | 0.614526    | -0.48959163 | -1.10411763 | 1.10411763 |
| RPL14     | MTURN        | -0.6323293  | 0.47165772  | 1.10398702  | 1.10398702 |
| ESRRG     | WNK1         | -0.32525167 | 0.7786542   | 1.10390587  | 1.10390587 |
| CCT3      | ABCA1        | -0.43195173 | 0.67189777  | 1.1038495   | 1.1038495  |
| CSF3R     | QSOX1        | -0.6434909  | 0.46011513  | 1.10360603  | 1.10360603 |
| DHRS12    | SOX4         | 0.61314327  | -0.49029246 | -1.10343573 | 1.10343573 |
| CPXM1     | DDR2         | 0.5634718   | -0.5397569  | -1.1032287  | 1.1032287  |
| GPC1      | EGR1         | 0.60559565  | -0.49761304 | -1.10320869 | 1.10320869 |
| SEL1L3    | EGR1         | 0.4690538   | -0.63406825 | -1.10312205 | 1.10312205 |
| MFAP3     | PDE7A        | 0.43145177  | -0.67163664 | -1.10308841 | 1.10308841 |
| MCM6      | UBTF         | -0.43380877 | 0.66925967  | 1.10306844  | 1.10306844 |
| COG6      | ANTXR2       | -0.4602705  | 0.6427911   | 1.1030616   | 1.1030616  |
| VEGFA     | POLN         | 0.37214333  | -0.73089737 | -1.1030407  | 1.1030407  |
| SRPRB     | NID2         | -0.4921347  | 0.61089694  | 1.10303164  | 1.10303164 |
| WWOX      | CADM1        | -0.532145   | 0.57086766  | 1.10301266  | 1.10301266 |
| COL4A1    | SSPN         | -0.22379355 | 0.8791302   | 1.10292375  | 1.10292375 |
| INF2      | CSNK2A1      | 0.25405782  | -0.84873706 | -1.10279488 | 1.10279488 |
| HDAC11    | MCM3         | -0.80089515 | 0.30178115  | 1.1026763   | 1.1026763  |
| MCM6      | SPEF2        | 0.33603507  | -0.7665464  | -1.10258147 | 1.10258147 |
| PDE4DIP   | LAP3         | -0.54272485 | 0.55948573  | 1.10221058  | 1.10221058 |
| ESRRG     | IL4          | 0.7409403   | -0.3611838  | -1.1021241  | 1.1021241  |
| CHST11    | COL5A1       | -0.30949667 | 0.7924941   | 1.10199077  | 1.10199077 |
| RBM17     | GSTM5        | 0.8908159   | -0.2110684  | -1.1018843  | 1.1018843  |
| PDHB      | FAM76A       | -0.45346656 | 0.64823055  | 1.10169711  | 1.10169711 |
| ZNF385D   | RGS5         | -0.52375436 | 0.5779084   | 1.10166276  | 1.10166276 |
| NSMF      | MYO19        | -0.27359405 | 0.8279819   | 1.10157595  | 1.10157595 |
| TOR1AIP1  | GSTM5        | 0.47559306  | -0.62589824 | -1.1014913  | 1.1014913  |
| LOC441204 | IKZF1        | 0.6373879   | -0.46403444 | -1.10142234 | 1.10142234 |
| NUDCD2    | CLRN1        | 0.6322629   | -0.46882135 | -1.10108425 | 1.10108425 |
| HLF       | LMBRD2       | -0.75336754 | 0.3476957   | 1.10106324  | 1.10106324 |
| XPO1      | CDC7         | -0.5545394  | 0.5464426   | 1.100982    | 1.100982   |
| HSPB2     | TSPAN9       | -0.84016883 | 0.26078135  | 1.10095018  | 1.10095018 |
| UNC5C     | FIGF         | -0.44786382 | 0.65277255  | 1.10063637  | 1.10063637 |
| SOD2      | GABARAPL1    | -0.59948707 | 0.50114375  | 1.10063082  | 1.10063082 |
| DUSP3     | LOC100507547 | -0.571831   | 0.5287802   | 1.1006112   | 1.1006112  |
| FASTKD1   | ZNF384       | -0.35077387 | 0.74961734  | 1.10039121  | 1.10039121 |
| CCNI      | PPP3R1       | 0.62733185  | -0.47304848 | -1.10038033 | 1.10038033 |
| MYOC      | INTS6        | 0.5125604   | -0.5876353  | -1.1001957  | 1.1001957  |
| ITSN1     | LTF          | -0.6379661  | 0.46220395  | 1.10017005  | 1.10017005 |
| USP4      | USP9X        | -0.60097766 | 0.49917448  | 1.10015214  | 1.10015214 |

|             |          |             |             |             |            |
|-------------|----------|-------------|-------------|-------------|------------|
| PARK2       | KCND3    | -0.6510445  | 0.44853646  | 1.09958096  | 1.09958096 |
| LOC10099669 | C1orf131 | 0.29363325  | -0.80593115 | -1.0995644  | 1.0995644  |
| MFAP3       | RCHY1    | 0.6326425   | -0.46688306 | -1.09952556 | 1.09952556 |
| STX7        | STK10    | 0.51113576  | -0.58835524 | -1.099491   | 1.099491   |
| ZBTB44      | GPBP1L1  | 0.4460873   | -0.6533478  | -1.0994351  | 1.0994351  |
| SLC26A7     | CASP5    | -0.7475734  | 0.3512127   | 1.0987861   | 1.0987861  |
| CDK6        | COL6A3   | 0.54913414  | -0.549608   | -1.09874214 | 1.09874214 |
| PDZD2       | CNOT11   | -0.4704207  | 0.6282298   | 1.0986505   | 1.0986505  |
| KANK1       | QSOX1    | 0.4621131   | -0.6364802  | -1.0985933  | 1.0985933  |
| DCN         | KIF13A   | 0.84489316  | -0.25363216 | -1.09852532 | 1.09852532 |
| KALRN       | GEMIN8   | -0.60244614 | 0.49565548  | 1.09810162  | 1.09810162 |
| RACGAP1     | SNX18    | -0.39255902 | 0.70535016  | 1.09790918  | 1.09790918 |
| CRY2        | MTHFD1   | 0.6899053   | -0.40795574 | -1.09786104 | 1.09786104 |
| ADAMTS2     | DIEXF    | -0.470853   | 0.6267737   | 1.0976267   | 1.0976267  |
| EZH2        | PRR11    | 0.88562864  | -0.21189785 | -1.09752649 | 1.09752649 |
| CTNNA1      | ELF4     | -0.32121375 | 0.7762791   | 1.09749285  | 1.09749285 |
| XRCC5       | LDLRAD4  | -0.4865959  | 0.6105527   | 1.0971486   | 1.0971486  |
| CSF3R       | FGF18    | -0.63752395 | 0.45956895  | 1.0970929   | 1.0970929  |
| PTPRG       | NTSR2    | 0.42506647  | -0.67199826 | -1.09706473 | 1.09706473 |
| MED16       | WDR54    | -0.52408904 | 0.57293016  | 1.0970192   | 1.0970192  |
| PARPBP      | MYO19    | 0.83737975  | -0.2594363  | -1.09681605 | 1.09681605 |
| ATP1A2      | PRUNE2   | 0.521971    | -0.57466865 | -1.09663965 | 1.09663965 |
| RNF130      | BST2     | -0.80648035 | 0.29008788  | 1.09656823  | 1.09656823 |
| GEM         | LTBP4    | 0.7546099   | -0.34157214 | -1.09618204 | 1.09618204 |
| RBPJ        | BST2     | -0.532398   | 0.56374615  | 1.09614415  | 1.09614415 |
| COL27A1     | POLN     | 0.38460052  | -0.71151024 | -1.09611076 | 1.09611076 |
| SRD5A1      | CFLAR    | -0.55929357 | 0.5366221   | 1.09591567  | 1.09591567 |
| SOX4        | RCC2     | -0.6333788  | 0.462505    | 1.0958838   | 1.0958838  |
| RBM17       | DAZAP1   | -0.5438388  | 0.55200905  | 1.09584785  | 1.09584785 |
| DKC1        | TK1      | 0.5959912   | -0.49982163 | -1.09581283 | 1.09581283 |
| EIF4E3      | ZC3HAV1L | -0.74305654 | 0.3526368   | 1.09569334  | 1.09569334 |
| SNAP29      | DBI      | -0.29147232 | 0.8037116   | 1.09518392  | 1.09518392 |
| WIPI2       | DNAJB1   | 0.72459245  | -0.37055448 | -1.09514693 | 1.09514693 |
| SSBP2       | PSMA4    | -0.52353054 | 0.57157785  | 1.09510839  | 1.09510839 |
| UBC         | ASB6     | -0.5738544  | 0.5210189   | 1.0948733   | 1.0948733  |
| STAR        | UST      | -0.7026901  | 0.39211902  | 1.09480912  | 1.09480912 |
| STAT3       | JUN      | 0.5783673   | -0.5161511  | -1.0945184  | 1.0945184  |
| CSTF3       | POLN     | 0.39007404  | -0.70415616 | -1.0942302  | 1.0942302  |
| RAE1        | WDR13    | -0.77661127 | 0.3175505   | 1.09416177  | 1.09416177 |
| CTSL        | TMEM2    | -0.28691518 | 0.807211    | 1.09412618  | 1.09412618 |
| ADRB1       | FOS      | -0.7004459  | 0.39361575  | 1.09406165  | 1.09406165 |
| ARNTL       | ANTXR2   | 0.6432149   | -0.45045993 | -1.09367483 | 1.09367483 |
| PARVA       | THBS3    | 0.6132847   | -0.48036277 | -1.09364747 | 1.09364747 |
| TULP4       | SYCP1    | -0.28450742 | 0.8090552   | 1.09356262  | 1.09356262 |
| SSB         | LARP6    | -0.30586734 | 0.78756064  | 1.09342798  | 1.09342798 |
| MYD88       | SLC25A29 | -0.43107006 | 0.66233677  | 1.09340683  | 1.09340683 |
| MFAP3       | SPG20    | -0.35003844 | 0.7431982   | 1.09323664  | 1.09323664 |
| CA12        | CTNNA1   | -0.4766376  | 0.61650926  | 1.09314686  | 1.09314686 |
| TAF1C       | PHF8     | -0.25890416 | 0.8342368   | 1.09314096  | 1.09314096 |
| LARP6       | CERS5    | 0.7644308   | -0.3285904  | -1.0930212  | 1.0930212  |
| TCF3        | C1QBP    | 0.6729451   | -0.41988254 | -1.09282764 | 1.09282764 |
| COMMD3      | VAPB     | -0.39712018 | 0.6956961   | 1.09281628  | 1.09281628 |
| RGS5        | DDR2     | 0.83626884  | -0.25643924 | -1.09270808 | 1.09270808 |
| CA12        | WWTR1    | 0.48345277  | -0.6091954  | -1.09264817 | 1.09264817 |
| PRICKLE1    | EIF4E3   | 0.48361364  | -0.6089965  | -1.09261014 | 1.09261014 |

|          |          |             |             |             |            |
|----------|----------|-------------|-------------|-------------|------------|
| MAP4K4   | ADAMTS1  | 0.5847378   | -0.50772613 | -1.09246393 | 1.09246393 |
| RACGAP1  | ARHGEF37 | -0.62111074 | 0.47134575  | 1.09245649  | 1.09245649 |
| RSU1     | ISYNA1   | 0.3043943   | -0.78771    | -1.0921043  | 1.0921043  |
| PTPN11   | UNC5C    | -0.6008373  | 0.4910811   | 1.0919184   | 1.0919184  |
| SOX4     | ISCU     | 0.58619326  | -0.5056614  | -1.09185466 | 1.09185466 |
| MFAP3    | ZBTB10   | -0.42119586 | 0.67061174  | 1.0918076   | 1.0918076  |
| MANF     | LPCAT2   | 0.47345734  | -0.61791825 | -1.09137559 | 1.09137559 |
| CPED1    | SIRPA    | 0.7060412   | -0.38530594 | -1.09134714 | 1.09134714 |
| CBLB     | NIPA2    | -0.4985286  | 0.59281737  | 1.09134597  | 1.09134597 |
| TOP2A    | FDPS     | 0.36808747  | -0.72303575 | -1.09112322 | 1.09112322 |
| APC      | COMMD3   | -0.47250283 | 0.61860675  | 1.09110958  | 1.09110958 |
| TRIM27   | AP3S2    | -0.47618186 | 0.6149186   | 1.09110046  | 1.09110046 |
| NUP62    | BFSP1    | -0.5619732  | 0.5289272   | 1.0909004   | 1.0909004  |
| EIF4G3   | PHF8     | 0.47926238  | -0.61163586 | -1.09089824 | 1.09089824 |
| CYR61    | FCGBP    | 0.5908737   | -0.49994856 | -1.09082226 | 1.09082226 |
| ITSN1    | STX6     | -0.7359009  | 0.35485414  | 1.09075504  | 1.09075504 |
| CDC25B   | MDN1     | -0.39749587 | 0.6932275   | 1.09072337  | 1.09072337 |
| SGCB     | QSOX1    | 0.5305695   | -0.5601274  | -1.0906969  | 1.0906969  |
| IFNAR2   | HELLS    | -0.4181368  | 0.67231685  | 1.09045365  | 1.09045365 |
| ZBTB7A   | ZBTB24   | 0.51536334  | -0.5750412  | -1.09040454 | 1.09040454 |
| TUBB     | PFND4    | 0.48534355  | -0.605056   | -1.09039955 | 1.09039955 |
| LDLRAD4  | PRICKLE1 | 0.6908707   | -0.39948794 | -1.09035864 | 1.09035864 |
| USP9X    | AGPAT5   | -0.29262182 | 0.7975497   | 1.09017152  | 1.09017152 |
| GALNT2   | PPM1L    | -0.44999444 | 0.6400124   | 1.09000684  | 1.09000684 |
| SLC25A22 | SLC25A5  | 0.7261504   | -0.36366674 | -1.08981714 | 1.08981714 |
| PPM1A    | PSMA4    | -0.660219   | 0.42957717  | 1.08979617  | 1.08979617 |
| SPEF2    | NIPA2    | 0.26489782  | -0.8248661  | -1.08976392 | 1.08976392 |
| UBE2B    | ATP6V1G1 | -0.48814714 | 0.60152346  | 1.0896706   | 1.0896706  |
| STAT3    | SOCS3    | 0.6257423   | -0.46392202 | -1.08966432 | 1.08966432 |
| URB2     | CCDC117  | 0.59291196  | -0.496619   | -1.08953096 | 1.08953096 |
| TCEB3    | LCA5     | -0.33578095 | 0.7536885   | 1.08946945  | 1.08946945 |
| TBL1XR1  | DCAF11   | 0.729263    | -0.3602027  | -1.0894657  | 1.0894657  |
| LMO3     | SAA4     | -0.56854934 | 0.5207096   | 1.08925894  | 1.08925894 |
| APC      | HNRNPC   | -0.5265743  | 0.5624219   | 1.0889962   | 1.0889962  |
| MFAP3    | LMO3     | -0.71190006 | 0.3769768   | 1.08887686  | 1.08887686 |
| AHNAK    | LMBRD2   | -0.5645177  | 0.524338    | 1.0888557   | 1.0888557  |
| TAOK3    | ITGA8    | 0.7220075   | -0.36683294 | -1.08884044 | 1.08884044 |
| SRSF1    | WAC      | -0.41110066 | 0.6777352   | 1.08883586  | 1.08883586 |
| NEDD4L   | SSB      | -0.56789535 | 0.520846    | 1.08874135  | 1.08874135 |
| RELA     | ABCA1    | -0.45602003 | 0.6326623   | 1.08868233  | 1.08868233 |
| SLC7A1   | CCDC117  | 0.5806442   | -0.5078374  | -1.0884816  | 1.0884816  |
| TMOD3    | RACGAP1  | 0.51852137  | -0.5699433  | -1.08846467 | 1.08846467 |
| FOSB     | TMEM163  | 0.68087983  | -0.40756282 | -1.08844265 | 1.08844265 |
| GABBR1   | PHF8     | 0.7700236   | -0.318404   | -1.0884276  | 1.0884276  |
| SKP1     | MSRB1    | -0.67627966 | 0.41179195  | 1.08807161  | 1.08807161 |
| CYBRD1   | PSMB3    | -0.6525976  | 0.43540448  | 1.08800208  | 1.08800208 |
| UNC5C    | CYP2B6   | -0.48121583 | 0.60674864  | 1.08796447  | 1.08796447 |
| COL3A1   | H2AFY    | -0.3795379  | 0.70836216  | 1.08790006  | 1.08790006 |
| SCRN1    | TPM4     | 0.45293704  | -0.6347734  | -1.08771044 | 1.08771044 |
| LIG3     | SOX4     | -0.67627287 | 0.4114105   | 1.08768337  | 1.08768337 |
| KPNA4    | TCEA3    | -0.53039885 | 0.5572238   | 1.08762265  | 1.08762265 |
| QSOX1    | JUND     | 0.5193662   | -0.56821823 | -1.08758443 | 1.08758443 |
| RBPJ     | CCM2     | -0.5958817  | 0.49147847  | 1.08736017  | 1.08736017 |
| THRB     | PSMB3    | -0.7436891  | 0.34356788  | 1.08725698  | 1.08725698 |
| KAT6B    | MAP4     | 0.56209     | -0.5251118  | -1.0872018  | 1.0872018  |

|          |              |             |             |             |            |
|----------|--------------|-------------|-------------|-------------|------------|
| CSRP2BP  | DNAJC9       | -0.50650805 | 0.5806158   | 1.08712385  | 1.08712385 |
| TOP2A    | MCM5         | 0.7187027   | -0.36840472 | -1.08710742 | 1.08710742 |
| NDN      | MAGED4       | 0.6874514   | -0.3993683  | -1.0868197  | 1.0868197  |
| TRIM2    | BCAR1        | -0.6255761  | 0.46121898  | 1.08679508  | 1.08679508 |
| SSRP1    | MCM4         | 0.79677445  | -0.28996253 | -1.08673698 | 1.08673698 |
| SPAG16   | SNRPC        | -0.46467236 | 0.6219489   | 1.08662126  | 1.08662126 |
| KIF5B    | PRRC2A       | 0.42077848  | -0.6658427  | -1.08662118 | 1.08662118 |
| PDE4DIP  | MOCOS        | -0.67457616 | 0.41170415  | 1.08628031  | 1.08628031 |
| TM9SF3   | NIPA2        | -0.23149504 | 0.85472727  | 1.08622231  | 1.08622231 |
| PDZRN3   | MRPL47       | -0.76207566 | 0.32395858  | 1.08603424  | 1.08603424 |
| IPO11    | CHD2         | -0.49395874 | 0.5920686   | 1.08602734  | 1.08602734 |
| XPO1     | STK10        | -0.45359528 | 0.63242817  | 1.08602345  | 1.08602345 |
| APBB2    | TOR1AIP1     | 0.7359421   | -0.35006818 | -1.08601028 | 1.08601028 |
| HDAC1    | CASP6        | -0.6237511  | 0.46194217  | 1.08569327  | 1.08569327 |
| GTF3C1   | ARPIN        | 0.49155882  | -0.5941319  | -1.08569072 | 1.08569072 |
| ZNF385D  | NFIA         | -0.62405753 | 0.46152747  | 1.085585    | 1.085585   |
| RACGAP1  | KANK1        | -0.6832969  | 0.40213504  | 1.08543194  | 1.08543194 |
| EPB41L4A | HLA-C        | 0.44018877  | -0.6449088  | -1.08509757 | 1.08509757 |
| TUSC3    | PRUNE2       | -0.7968592  | 0.28818333  | 1.08504253  | 1.08504253 |
| MMS19    | FAM63B       | 0.5622396   | -0.5227     | -1.0849396  | 1.0849396  |
| KLF4     | SCML2        | -0.41872182 | 0.6661863   | 1.08490812  | 1.08490812 |
| DHRS12   | TIMM23       | -0.56525594 | 0.51961154  | 1.08486748  | 1.08486748 |
| STX8     | SERPINA3     | -0.56547856 | 0.5193852   | 1.08486376  | 1.08486376 |
| THRB     | QSOX1        | 0.520741    | -0.56391996 | -1.08466096 | 1.08466096 |
| AIMP1    | PDE7A        | 0.43965617  | -0.64500225 | -1.08465842 | 1.08465842 |
| CPNE3    | QSOX1        | 0.48347405  | -0.6010246  | -1.08449865 | 1.08449865 |
| SPPL2A   | RIN3         | 0.3932637   | -0.6911485  | -1.0844122  | 1.0844122  |
| MAD2L1BP | CBLB         | -0.47125065 | 0.6129404   | 1.08419105  | 1.08419105 |
| MCM6     | ADAMTS2      | -0.38815334 | 0.69603246  | 1.0841858   | 1.0841858  |
| CASP8    | FMO2         | -0.5562472  | 0.52791     | 1.0841572   | 1.0841572  |
| PLA2G2A  | CEACAM1      | 0.42439938  | -0.65970427 | -1.08410365 | 1.08410365 |
| INTS6    | LZTS1        | -0.6230984  | 0.4609288   | 1.0840272   | 1.0840272  |
| PMM2     | EPHX2        | -0.5834163  | 0.50050664  | 1.08392294  | 1.08392294 |
| ARPP21   | ADAMTS1      | -0.7609822  | 0.32292363  | 1.08390583  | 1.08390583 |
| GSTM1    | TXNDC17      | -0.75178003 | 0.3318967   | 1.08367673  | 1.08367673 |
| SERPINA1 | TSPAN9       | 0.7320173   | -0.3514551  | -1.0834724  | 1.0834724  |
| HIVEP3   | CHST15       | 0.6056567   | -0.47775555 | -1.08341225 | 1.08341225 |
| IGF1R    | ELOVL5       | -0.5569788  | 0.526405    | 1.0833838   | 1.0833838  |
| ZBTB10   | NOL9         | -0.5248361  | 0.5585209   | 1.083357    | 1.083357   |
| BCL2L1   | DNMT1        | 0.39891997  | -0.6843761  | -1.08329607 | 1.08329607 |
| TBC1D9B  | UST          | 0.49365425  | -0.58957094 | -1.08322519 | 1.08322519 |
| ITGB1    | THBS3        | 0.47024858  | -0.6129429  | -1.08319148 | 1.08319148 |
| GALNT2   | KIAA1715     | -0.35888886 | 0.7242846   | 1.08317346  | 1.08317346 |
| TRIM2    | SORL1        | 0.6542999   | -0.4288558  | -1.0831557  | 1.0831557  |
| KATNAL1  | NVL          | -0.36987355 | 0.71326244  | 1.08313599  | 1.08313599 |
| CSRP2BP  | GET4         | -0.6641821  | 0.4188429   | 1.083025    | 1.083025   |
| SUFU     | CDK5         | -0.36680838 | 0.71616375  | 1.08297213  | 1.08297213 |
| RUFY3    | VANGL1       | -0.38680127 | 0.6961557   | 1.08295697  | 1.08295697 |
| AGPAT5   | LOC100996693 | 0.36950636  | -0.71333957 | -1.08284593 | 1.08284593 |
| PFDN4    | PPP1R13L     | 0.55293137  | -0.5298478  | -1.08277917 | 1.08277917 |
| HDAC11   | DNAJC9       | -0.7757294  | 0.30704254  | 1.08277194  | 1.08277194 |
| ASB9     | RAB40B       | -0.60713726 | 0.47551665  | 1.08265391  | 1.08265391 |
| SRD5A1   | STK10        | -0.28515568 | 0.7974636   | 1.08261928  | 1.08261928 |
| CPXM1    | EZH2         | -0.5001971  | 0.5822443   | 1.0824414   | 1.0824414  |
| ABI2     | IFT81        | 0.582227    | -0.50003743 | -1.08226443 | 1.08226443 |



|          |          |             |             |             |            |
|----------|----------|-------------|-------------|-------------|------------|
| CAST     | ESRRG    | -0.71303475 | 0.36917806  | 1.08221281  | 1.08221281 |
| BIK      | BCL2     | -0.7581294  | 0.32391524  | 1.08204464  | 1.08204464 |
| TACC1    | KIAA0391 | -0.6769218  | 0.4049558   | 1.0818776   | 1.0818776  |
| HSP90AA1 | CDCA7    | 0.48599392  | -0.59571517 | -1.08170909 | 1.08170909 |
| YARS     | RNF150   | -0.7509226  | 0.33077267  | 1.08169527  | 1.08169527 |
| MKLN1    | PDE7A    | 0.57875013  | -0.5027882  | -1.08153833 | 1.08153833 |
| MED15    | CREB3L4  | -0.6944369  | 0.38705572  | 1.08149262  | 1.08149262 |
| RSPO3    | PLEKHG3  | 0.6452728   | -0.43591392 | -1.08118672 | 1.08118672 |
| EPS8     | NUDT21   | -0.5303873  | 0.55078363  | 1.08117093  | 1.08117093 |
| SGCB     | PDHB     | -0.4068733  | 0.6742495   | 1.0811228   | 1.0811228  |
| EPM2A    | ZNF804A  | -0.65477246 | 0.42629537  | 1.08106783  | 1.08106783 |
| CCNA2    | RGS5     | -0.7045062  | 0.37650302  | 1.08100922  | 1.08100922 |
| VCAM1    | AIDA     | 0.25666496  | -0.8242073  | -1.08087226 | 1.08087226 |
| PCBP2    | LNX1     | 0.30501166  | -0.7758244  | -1.08083606 | 1.08083606 |
| XPNPEP1  | DFNB31   | -0.31586328 | 0.7643926   | 1.08025588  | 1.08025588 |
| GNAQ     | TEC      | 0.5640928   | -0.51608664 | -1.08017944 | 1.08017944 |
| MPPED2   | GSTM3    | 0.46799046  | -0.61190784 | -1.0798983  | 1.0798983  |
| CADM1    | RNF180   | -0.34066024 | 0.7392269   | 1.07988714  | 1.07988714 |
| PDLIM4   | SLC25A29 | -0.29000106 | 0.7897188   | 1.07971986  | 1.07971986 |
| BUB1B    | IMPDH1   | 0.40742093  | -0.6722945  | -1.07971543 | 1.07971543 |
| HLF      | SLC25A29 | 0.5068038   | -0.5728954  | -1.0796992  | 1.0796992  |
| NFKBIE   | MIB2     | 0.6234857   | -0.4561796  | -1.0796653  | 1.0796653  |
| CEACAM1  | CD164    | -0.41444218 | 0.66521865  | 1.07966083  | 1.07966083 |
| MCM6     | HLA-B    | -0.44576102 | 0.6338162   | 1.07957722  | 1.07957722 |
| ARL1     | ARHGEF12 | -0.6428289  | 0.43668255  | 1.07951145  | 1.07951145 |
| NUDCD2   | SIRPA    | -0.76419    | 0.31516847  | 1.07935847  | 1.07935847 |
| PIK3R1   | RPL14    | -0.3694979  | 0.7096241   | 1.079122    | 1.079122   |
| MCM3     | TIAL1    | -0.17475535 | 0.90415627  | 1.07891162  | 1.07891162 |
| PPP1CB   | TEC      | 0.4694317   | -0.6090517  | -1.0784834  | 1.0784834  |
| TRIM27   | CSRP2BP  | -0.37207332 | 0.706193    | 1.07826632  | 1.07826632 |
| WRAP53   | CHD2     | -0.73855925 | 0.33959028  | 1.07814953  | 1.07814953 |
| ARPP21   | ETV3     | -0.78889364 | 0.28922898  | 1.07812262  | 1.07812262 |
| CELF2    | TBC1D9B  | -0.6285421  | 0.44950414  | 1.07804624  | 1.07804624 |
| C12orf49 | EGR1     | 0.46467733  | -0.6133107  | -1.07798803 | 1.07798803 |
| ESRRG    | NFIA     | -0.7137432  | 0.36423326  | 1.07797646  | 1.07797646 |
| MED15    | RDH11    | -0.68108755 | 0.3968181   | 1.07790565  | 1.07790565 |
| ESRRG    | MPL      | -0.34488168 | 0.732917    | 1.07779868  | 1.07779868 |
| CPNE3    | MRPS22   | -0.27761218 | 0.8001605   | 1.07777268  | 1.07777268 |
| KALRN    | ACTN3    | 0.49487972  | -0.58286613 | -1.07774585 | 1.07774585 |
| COL5A1   | SDC2     | 0.59049535  | -0.4870071  | -1.07750245 | 1.07750245 |
| DPT      | HSD17B6  | 0.3889772   | -0.688438   | -1.0774152  | 1.0774152  |
| TUSC3    | CFLAR    | -0.35882825 | 0.71855557  | 1.07738382  | 1.07738382 |
| GSS      | PARPBP   | 0.66556865  | -0.41179305 | -1.0773617  | 1.0773617  |
| CPNE3    | MMP15    | 0.6571584   | -0.4200858  | -1.0772442  | 1.0772442  |
| SERBP1   | ZBTB10   | -0.6078574  | 0.4693091   | 1.0771665   | 1.0771665  |
| MRPS22   | RMDN1    | -0.5238984  | 0.55324286  | 1.07714126  | 1.07714126 |
| CSNK2A1  | SPTBN1   | -0.6092908  | 0.4678246   | 1.0771154   | 1.0771154  |
| HTT      | FAM111A  | -0.56689245 | 0.51018673  | 1.07707918  | 1.07707918 |
| EXOG     | ZNF500   | -0.5426186  | 0.5344071   | 1.0770257   | 1.0770257  |
| MAP4K4   | SOX4     | -0.34879634 | 0.7281981   | 1.07699444  | 1.07699444 |
| KCNRG    | DNAJC9   | 0.57508415  | -0.5019004  | -1.07698455 | 1.07698455 |
| MLST8    | DMXL2    | -0.5233585  | 0.5536208   | 1.0769793   | 1.0769793  |
| SAP18    | QSOX1    | 0.5107616   | -0.5661441  | -1.0769057  | 1.0769057  |
| DYSF     | C10orf90 | 0.6104235   | -0.4664077  | -1.0768312  | 1.0768312  |
| YARS     | VAMP4    | -0.5453731  | 0.53137356  | 1.07674666  | 1.07674666 |

|          |          |             |             |             |            |
|----------|----------|-------------|-------------|-------------|------------|
| GNAO     | ZNF385D  | -0.49420822 | 0.58243734  | 1.07664556  | 1.07664556 |
| GTF3C1   | BRF1     | 0.4512072   | -0.62538743 | -1.07659463 | 1.07659463 |
| ZNF385D  | HINFP    | -0.55193686 | 0.5242294   | 1.07616626  | 1.07616626 |
| MDN1     | HDAC1    | -0.5081038  | 0.5678982   | 1.076002    | 1.076002   |
| ZFP36L1  | PRR14L   | 0.7042122   | -0.37167665 | -1.07588885 | 1.07588885 |
| FAM216A  | ZNF678   | -0.49879515 | 0.57697713  | 1.07577228  | 1.07577228 |
| COL27A1  | THBS3    | -0.34538007 | 0.73021555  | 1.07559562  | 1.07559562 |
| TCEB3    | SNX1     | -0.43235403 | 0.6431276   | 1.07548163  | 1.07548163 |
| DHRS12   | NIPA2    | -0.61632407 | 0.45902973  | 1.0753538   | 1.0753538  |
| ZWINT    | FANCB    | 0.72250295  | -0.35273087 | -1.07523382 | 1.07523382 |
| MRPL47   | MAN2B2   | -0.8227664  | 0.2523793   | 1.0751457   | 1.0751457  |
| UBE2D1   | CFLAR    | -0.39442432 | 0.68068665  | 1.07511097  | 1.07511097 |
| SSBP2    | RAB13    | -0.75746703 | 0.3176244   | 1.07509143  | 1.07509143 |
| HSP90AA1 | H2AFY    | 0.39460644  | -0.68046486 | -1.0750713  | 1.0750713  |
| ACVR2A   | TLL2     | 0.8313492   | -0.24354647 | -1.07489567 | 1.07489567 |
| EIF4G3   | PHF10    | 0.5219501   | -0.5529355  | -1.0748856  | 1.0748856  |
| SSPN     | MRPS22   | -0.35967207 | 0.7151217   | 1.07479377  | 1.07479377 |
| TRAPPC3  | ZBTB7A   | -0.5883453  | 0.48621237  | 1.07455767  | 1.07455767 |
| SET      | SAA4     | 0.6535683   | -0.42092815 | -1.07449645 | 1.07449645 |
| PPIL2    | NEGR1    | 0.18870448  | -0.8856535  | -1.07435798 | 1.07435798 |
| RBMS3    | NEGR1    | -0.5718115  | 0.5023922   | 1.0742037   | 1.0742037  |
| SPAG5    | PRR11    | 0.89600533  | -0.17797133 | -1.07397666 | 1.07397666 |
| SORBS1   | PRICKLE1 | 0.39259452  | -0.68136865 | -1.07396317 | 1.07396317 |
| KANK1    | STX6     | -0.5675339  | 0.50640213  | 1.07393603  | 1.07393603 |
| ZWINT    | DCAF7    | -0.59859043 | 0.4750465   | 1.07363693  | 1.07363693 |
| FLNB     | ZNF500   | -0.6453024  | 0.42824164  | 1.07354404  | 1.07354404 |
| POSTN    | HELLS    | -0.23205052 | 0.84146     | 1.07351052  | 1.07351052 |
| SNX5     | GALNT2   | -0.59128505 | 0.481777    | 1.07306205  | 1.07306205 |
| GSS      | DCAF8    | -0.23436886 | 0.83849144  | 1.0728603   | 1.0728603  |
| IFNAR2   | DFNB31   | -0.5066317  | 0.5661708   | 1.0728025   | 1.0728025  |
| CHST11   | MDN1     | -0.7350342  | 0.3376991   | 1.0727333   | 1.0727333  |
| PAPSS1   | STX7     | 0.38646644  | -0.68616843 | -1.07263487 | 1.07263487 |
| CALCOCO2 | SOX4     | 0.48176843  | -0.59080935 | -1.07257778 | 1.07257778 |
| ARHGEF37 | DNAJC9   | -0.67550135 | 0.39695925  | 1.0724606   | 1.0724606  |
| MFAP3    | ASB1     | -0.33339313 | 0.7390529   | 1.07244603  | 1.07244603 |
| ESRRG    | TSKU     | -0.50412405 | 0.56826156  | 1.07238561  | 1.07238561 |
| UBC      | TIMELESS | -0.38052148 | 0.6916902   | 1.07221168  | 1.07221168 |
| AGPAT5   | CCDC117  | 0.3875129   | -0.6846923  | -1.0722052  | 1.0722052  |
| COL4A1   | ACTN3    | 0.45797643  | -0.6141607  | -1.07213713 | 1.07213713 |
| DNAJC15  | C11orf98 | -0.5191392  | 0.55289644  | 1.07203564  | 1.07203564 |
| ADAMTS3  | ISM1     | 0.5637015   | -0.5081534  | -1.0718549  | 1.0718549  |
| CETP     | GRWD1    | -0.5960001  | 0.4758535   | 1.0718536   | 1.0718536  |
| PDZRN3   | AGPAT5   | -0.6798141  | 0.3920203   | 1.0718344   | 1.0718344  |
| PGP      | EZH2     | 0.61186     | -0.45984674 | -1.07170674 | 1.07170674 |
| NEGR1    | AGTRAP   | 0.33158484  | -0.7400453  | -1.07163014 | 1.07163014 |
| LDLRAD4  | C1QTNF3  | 0.72749805  | -0.34408936 | -1.07158741 | 1.07158741 |
| ALAD     | PRICKLE1 | 0.50911564  | -0.56226206 | -1.0713777  | 1.0713777  |
| DDX6     | TUFM     | -0.2598255  | 0.81133866  | 1.07116416  | 1.07116416 |
| CTNNA1   | CELSR1   | -0.4056062  | 0.665527    | 1.0711332   | 1.0711332  |
| SLC26A7  | PRICKLE1 | 0.55810285  | -0.5129919  | -1.07109475 | 1.07109475 |
| LTF      | FLRT2    | 0.66645354  | -0.40463325 | -1.07108679 | 1.07108679 |
| FKBP1A   | GABBR1   | -0.43757498 | 0.6334294   | 1.07100438  | 1.07100438 |
| PUS1     | CHD2     | -0.42944214 | 0.6415374   | 1.07097954  | 1.07097954 |
| POLR2C   | ATPIF1   | -0.5652275  | 0.5054623   | 1.0706898   | 1.0706898  |
| XRCC5    | WBP4     | -0.39283657 | 0.67784417  | 1.07068074  | 1.07068074 |

|          |           |             |             |             |            |
|----------|-----------|-------------|-------------|-------------|------------|
| MYOM1    | GALNT2    | -0.7358197  | 0.33484095  | 1.07066065  | 1.07066065 |
| ABCG1    | CREB3L4   | -0.44388527 | 0.6267559   | 1.07064117  | 1.07064117 |
| TRIM14   | DDB2      | -0.2566546  | 0.8139584   | 1.070613    | 1.070613   |
| XRCC5    | IGF2R     | -0.62491566 | 0.44563824  | 1.0705539   | 1.0705539  |
| PDE4DIP  | RACGAP1   | -0.5779714  | 0.4925445   | 1.0705159   | 1.0705159  |
| PDE7A    | SLC39A14  | 0.51850843  | -0.5519056  | -1.07041403 | 1.07041403 |
| ITGB4    | SVEP1     | -0.7266399  | 0.34370974  | 1.07034964  | 1.07034964 |
| ZBTB10   | ADAMTS9   | -0.45569625 | 0.61457556  | 1.07027181  | 1.07027181 |
| CAPS2    | ACTN3     | 0.51359653  | -0.5566705  | -1.07026703 | 1.07026703 |
| TOP2A    | NOP2      | 0.6007039   | -0.4695227  | -1.0702266  | 1.0702266  |
| VCAM1    | PINK1     | 0.55453825  | -0.51567    | -1.07020825 | 1.07020825 |
| DCAF8    | HPS6      | -0.5539695  | 0.5162357   | 1.0702052   | 1.0702052  |
| PRMT5    | PCMTD1    | -0.6645098  | 0.4055175   | 1.0700273   | 1.0700273  |
| COG6     | CLASRP    | 0.58974123  | -0.4802644  | -1.07000563 | 1.07000563 |
| FAT3     | EFEMP2    | 0.54242826  | -0.5275369  | -1.06996516 | 1.06996516 |
| AK2      | MRPS14    | -0.22791012 | 0.8420352   | 1.06994532  | 1.06994532 |
| ENG      | RNF130    | -0.5492465  | 0.5204883   | 1.0697348   | 1.0697348  |
| ENO3     | FHOD1     | -0.42943713 | 0.64006054  | 1.06949767  | 1.06949767 |
| SERPINA1 | ESRRG     | 0.53184414  | -0.53754646 | -1.0693906  | 1.0693906  |
| ADAMTS2  | LPGAT1    | 0.58270866  | -0.48662797 | -1.06933663 | 1.06933663 |
| ARPP21   | KLF4      | -0.6650582  | 0.40409097  | 1.06914917  | 1.06914917 |
| CWF19L2  | SDPR      | 0.5655303   | -0.5035309  | -1.0690612  | 1.0690612  |
| MBD2     | PSMB2     | -0.51125914 | 0.55774206  | 1.0690012   | 1.0690012  |
| FAM76A   | GGCT      | -0.7072844  | 0.3616575   | 1.0689419   | 1.0689419  |
| MGAT5    | CLASP2    | -0.22452912 | 0.84421384  | 1.06874296  | 1.06874296 |
| PSMB3    | NAALADL2  | -0.66128206 | 0.40726128  | 1.06854334  | 1.06854334 |
| EIF5     | KLF12     | 0.2871113   | -0.7812882  | -1.0683995  | 1.0683995  |
| CTNNA1   | MTHFD1L   | -0.47259927 | 0.59575146  | 1.06835073  | 1.06835073 |
| UBC      | TBRG4     | -0.6679893  | 0.40027618  | 1.06826548  | 1.06826548 |
| MCM6     | USP9X     | -0.34620467 | 0.72205055  | 1.06825522  | 1.06825522 |
| MRPS22   | SNX18     | -0.38691598 | 0.6812804   | 1.06819638  | 1.06819638 |
| EGFL6    | HOXB8     | 0.53581977  | -0.532191   | -1.06801077 | 1.06801077 |
| TOR1AIP2 | IRF4      | -0.72461206 | 0.3433574   | 1.06796946  | 1.06796946 |
| COPZ1    | SEC62     | -0.52076477 | 0.54713136  | 1.06789613  | 1.06789613 |
| ACVR2A   | AACS      | -0.5391993  | 0.5286045   | 1.0678038   | 1.0678038  |
| ORMDL1   | NFIX      | 0.4454872   | -0.6222913  | -1.0677785  | 1.0677785  |
| SLAMF1   | ESRP2     | 0.7056767   | -0.36139327 | -1.06706997 | 1.06706997 |
| TAOK3    | ENTPD3    | 0.5386291   | -0.52839655 | -1.06702565 | 1.06702565 |
| COPZ1    | PDZD2     | -0.5147214  | 0.55221814  | 1.06693954  | 1.06693954 |
| CYR61    | IGFBP4    | 0.47270188  | -0.5941771  | -1.06687898 | 1.06687898 |
| SHQ1     | COL5A1    | -0.36673638 | 0.70004374  | 1.06678012  | 1.06678012 |
| UBC      | DHX30     | -0.39483097 | 0.67189497  | 1.06672594  | 1.06672594 |
| COPZ1    | PDE7A     | 0.5476037   | -0.51909316 | -1.06669686 | 1.06669686 |
| NEDD4L   | MRPS22    | -0.53117824 | 0.5353217   | 1.06649994  | 1.06649994 |
| QSOX1    | PCOLCE2   | 0.5139709   | -0.5524722  | -1.0664431  | 1.0664431  |
| ELAC2    | PIK3IP1   | -0.37466615 | 0.69173986  | 1.06640601  | 1.06640601 |
| COL5A1   | HIST1H2BK | -0.43776783 | 0.62859696  | 1.06636479  | 1.06636479 |
| POLR1C   | NETO2     | 0.82346094  | -0.24288219 | -1.06634313 | 1.06634313 |
| PALLD    | MAP4      | 0.6354828   | -0.43082902 | -1.06631182 | 1.06631182 |
| SERBP1   | NETO2     | 0.84144926  | -0.22464219 | -1.06609145 | 1.06609145 |
| CSTF3    | COL15A1   | -0.7668683  | 0.29919556  | 1.06606386  | 1.06606386 |
| OPRK1    | LDLRAD4   | -0.61761147 | 0.4482097   | 1.06582117  | 1.06582117 |
| PAX2     | KLF12     | -0.28146842 | 0.7843493   | 1.06581772  | 1.06581772 |
| PPP1R14A | SEMA6A    | -0.7028855  | 0.36281905  | 1.06570455  | 1.06570455 |
| SERBP1   | KLF12     | 0.39778247  | -0.6678063  | -1.06558877 | 1.06558877 |

|          |          |             |             |             |            |
|----------|----------|-------------|-------------|-------------|------------|
| NOP56    | HDAC11   | -0.5439455  | 0.5216429   | 1.0655884   | 1.0655884  |
| RRBP1    | KIF5B    | 0.6361553   | -0.42942685 | -1.06558215 | 1.06558215 |
| NDRG2    | JUND     | 0.66230136  | -0.40307567 | -1.06537703 | 1.06537703 |
| VWA9     | NTNG2    | 0.417406    | -0.6479673  | -1.0653733  | 1.0653733  |
| NTRK2    | LTF      | -0.53837454 | 0.52691674  | 1.06529128  | 1.06529128 |
| RBM45    | MTHFSD   | 0.39024082  | -0.6750295  | -1.06527032 | 1.06527032 |
| MAP1B    | RPL14    | -0.59971946 | 0.46552166  | 1.06524112  | 1.06524112 |
| PGF      | FAT3     | -0.5201361  | 0.5449322   | 1.0650683   | 1.0650683  |
| ADAMTS2  | LAMA1    | -0.5149006  | 0.5500705   | 1.0649711   | 1.0649711  |
| GPHN     | LCLAT1   | -0.60920286 | 0.45559156  | 1.06479442  | 1.06479442 |
| NTRK2    | HSP90AA1 | -0.6441401  | 0.4206457   | 1.0647858   | 1.0647858  |
| SMYD3    | AACS     | -0.59811556 | 0.46663427  | 1.06474983  | 1.06474983 |
| FOXN3    | PSMB3    | -0.6873873  | 0.37733114  | 1.06471844  | 1.06471844 |
| DDX6     | PHF8     | -0.34950933 | 0.71517694  | 1.06468627  | 1.06468627 |
| KIF11    | NUSAP1   | 0.95173293  | -0.11290682 | -1.06463975 | 1.06463975 |
| CEACAM1  | SSFA2    | -0.3781209  | 0.6864549   | 1.0645758   | 1.0645758  |
| BUB1B    | PSMB2    | 0.754086    | -0.31043255 | -1.06451855 | 1.06451855 |
| RUFY3    | PTDSS1   | -0.62343454 | 0.44085333  | 1.06428787  | 1.06428787 |
| HSD11B1  | DBI      | -0.5836648  | 0.48057094  | 1.06423574  | 1.06423574 |
| SPAG5    | PHF8     | 0.47505373  | -0.5887844  | -1.06383813 | 1.06383813 |
| ITGB1    | COL1A1   | 0.3337619   | -0.7299039  | -1.0636658  | 1.0636658  |
| COL6A3   | AK9      | 0.49269187  | -0.57080215 | -1.06349402 | 1.06349402 |
| RUFY3    | MPHOSPH6 | -0.71511245 | 0.34836802  | 1.06348047  | 1.06348047 |
| GALNT11  | GALNT2   | -0.7279422  | 0.33548272  | 1.06342492  | 1.06342492 |
| XRCC5    | RAB4A    | -0.47375187 | 0.58955485  | 1.06330672  | 1.06330672 |
| KIAA0101 | MOCOS    | 0.71442765  | -0.34855816 | -1.06298581 | 1.06298581 |
| LMO3     | COL1A1   | 0.16715042  | -0.8956476  | -1.06279802 | 1.06279802 |
| MID1     | LY75     | 0.71817267  | -0.34461537 | -1.06278804 | 1.06278804 |
| KIF13A   | TBRG4    | -0.5868999  | 0.47588605  | 1.06278595  | 1.06278595 |
| SS18L2   | RRN3     | -0.45749113 | 0.60527056  | 1.06276169  | 1.06276169 |
| ESRRG    | ITIH5    | -0.25507173 | 0.8076115   | 1.06268323  | 1.06268323 |
| NOD1     | VAR52    | -0.34215784 | 0.72048336  | 1.0626412   | 1.0626412  |
| XRCC5    | POU2F2   | 0.2860276   | -0.7765573  | -1.0625849  | 1.0625849  |
| SOX4     | EIF4E3   | 0.31149778  | -0.7510355  | -1.06253328 | 1.06253328 |
| ZWINT    | SCML2    | 0.4276383   | -0.6348283  | -1.0624666  | 1.0624666  |
| PALLD    | FOXJ2    | -0.28776047 | 0.7746882   | 1.06244867  | 1.06244867 |
| HNRNPA1  | PRRC2A   | -0.5642691  | 0.49814156  | 1.06241066  | 1.06241066 |
| CALD1    | NETO2    | -0.59043515 | 0.4718964   | 1.06233155  | 1.06233155 |
| CEACAM1  | PDZD2    | -0.34337717 | 0.71880114  | 1.06217831  | 1.06217831 |
| CDK6     | MGEA5    | -0.48651007 | 0.5755889   | 1.06209897  | 1.06209897 |
| HSP90AA1 | HNRNPC   | 0.4835374   | -0.57838184 | -1.06191924 | 1.06191924 |
| STS      | ITGA8    | 0.7637229   | -0.298102   | -1.0618249  | 1.0618249  |
| KCND2    | GALNT2   | -0.52649015 | 0.53533286  | 1.06182301  | 1.06182301 |
| ZFR      | CAMK2N1  | -0.60228723 | 0.45934638  | 1.06163361  | 1.06163361 |
| SOD2     | KLF9     | -0.5200706  | 0.54132676  | 1.06139736  | 1.06139736 |
| PPA1     | NDN      | -0.5993299  | 0.46205953  | 1.06138943  | 1.06138943 |
| TOP2A    | COPZ1    | 0.5398217   | -0.52155703 | -1.06137873 | 1.06137873 |
| PPA1     | LRP8     | 0.8353481   | -0.22602865 | -1.06137675 | 1.06137675 |
| FLNB     | SLC24A4  | -0.35252798 | 0.70883065  | 1.06135863  | 1.06135863 |
| KCNK3    | PDLIM4   | -0.60294104 | 0.45831183  | 1.06125287  | 1.06125287 |
| QSOX1    | RMDN1    | 0.43693984  | -0.6242792  | -1.06121904 | 1.06121904 |
| NEDD4L   | ARPC5L   | -0.71472716 | 0.34648997  | 1.06121713  | 1.06121713 |
| SCARB2   | DNAJC9   | -0.7732841  | 0.28791463  | 1.06119873  | 1.06119873 |
| EPHA1    | RCC2     | 0.61260694  | -0.44853014 | -1.06113708 | 1.06113708 |
| GSTT2    | IP6K2    | -0.5746559  | 0.4863165   | 1.0609724   | 1.0609724  |

|           |          |             |             |             |            |
|-----------|----------|-------------|-------------|-------------|------------|
| LPIN1     | CDK6     | 0.36278263  | -0.6981239  | -1.06090653 | 1.06090653 |
| BCS1L     | SPERT    | 0.5736686   | -0.48694137 | -1.06060997 | 1.06060997 |
| TRAP1     | APP      | -0.42484367 | 0.6357621   | 1.06060577  | 1.06060577 |
| CAP2      | TDRKH    | -0.7993832  | 0.26121444  | 1.06059764  | 1.06059764 |
| SERBP1    | IRF9     | -0.5328789  | 0.5276755   | 1.0605544   | 1.0605544  |
| ZWINT     | GDAP2    | -0.4487793  | 0.61167043  | 1.06044973  | 1.06044973 |
| MOCOS     | SHMT2    | 0.696562    | -0.36385238 | -1.06041438 | 1.06041438 |
| TNC       | THBS1    | 0.48590118  | -0.57446855 | -1.06036973 | 1.06036973 |
| DTL       | DCAF7    | -0.4971641  | 0.56317335  | 1.06033745  | 1.06033745 |
| XPO1      | TUSC3    | -0.3523818  | 0.70790935  | 1.06029115  | 1.06029115 |
| SUFU      | CA8      | 0.3113392   | -0.7487991  | -1.0601383  | 1.0601383  |
| LTA       | MPHOSPH6 | 0.50067705  | -0.5594571  | -1.06013415 | 1.06013415 |
| CXCR4     | COLGALT1 | -0.60381263 | 0.45630857  | 1.0601212   | 1.0601212  |
| PDHB      | RNF150   | -0.38664997 | 0.67345774  | 1.06010771  | 1.06010771 |
| EPS8      | FANCI    | -0.6969327  | 0.36316445  | 1.06009715  | 1.06009715 |
| KCND2     | CBLN2    | 0.33125055  | -0.7288406  | -1.06009115 | 1.06009115 |
| NXF1      | NUP188   | -0.30831832 | 0.75166076  | 1.05997908  | 1.05997908 |
| COL5A1    | AGTRAP   | -0.31809118 | 0.741767    | 1.05985818  | 1.05985818 |
| TYRO3     | PRICKLE1 | 0.34964362  | -0.7101503  | -1.05979392 | 1.05979392 |
| DYSF      | ENTHD2   | -0.5185474  | 0.54112077  | 1.05966817  | 1.05966817 |
| MRPS33    | S100A8   | -0.4284557  | 0.6311604   | 1.0596161   | 1.0596161  |
| LIMK2     | SAFB2    | -0.453538   | 0.6059376   | 1.0594756   | 1.0594756  |
| GRWD1     | FOXP2    | -0.58140016 | 0.47807494  | 1.0594751   | 1.0594751  |
| PCNA      | CCDC90B  | -0.28364736 | 0.7757734   | 1.05942076  | 1.05942076 |
| SOX4      | FAM216A  | -0.6074165  | 0.45187432  | 1.05929082  | 1.05929082 |
| PPA1      | CA8      | -0.5057643  | 0.5533278   | 1.0590921   | 1.0590921  |
| EIF4G3    | BRAP     | 0.48156443  | -0.57743734 | -1.05900177 | 1.05900177 |
| CSNK1G2   | CDK10    | -0.22675765 | 0.8322353   | 1.05899295  | 1.05899295 |
| TOR1AIP1  | CWF19L2  | 0.46786803  | -0.5910845  | -1.05895253 | 1.05895253 |
| AKAP12    | QSOX1    | 0.4534167   | -0.6055249  | -1.0589416  | 1.0589416  |
| ESRRG     | QKI      | -0.34581143 | 0.71304744  | 1.05885887  | 1.05885887 |
| STXBP6    | MTHFR    | 0.5075027   | -0.55116963 | -1.05867233 | 1.05867233 |
| CD40      | ZFAT     | 0.54467595  | -0.5139621  | -1.05863805 | 1.05863805 |
| CYBRD1    | GSTM5    | 0.7474644   | -0.3110563  | -1.0585207  | 1.0585207  |
| SRD5A1    | RGS5     | -0.7076097  | 0.35085395  | 1.05846365  | 1.05846365 |
| CNKSR2    | ARHGEF12 | -0.700485   | 0.357958    | 1.058443    | 1.058443   |
| MAGI1     | IDNK     | 0.5370241   | -0.5213942  | -1.0584183  | 1.0584183  |
| SERBP1    | TM9SF3   | -0.56466675 | 0.49374327  | 1.05841002  | 1.05841002 |
| RAB35     | XXYL1    | 0.5911519   | -0.46720654 | -1.05835844 | 1.05835844 |
| ZNF385D   | MZF1     | -0.6569045  | 0.40145063  | 1.05835513  | 1.05835513 |
| PDIA4     | LRWD1    | 0.5395261   | -0.51876646 | -1.05829256 | 1.05829256 |
| XRCC5     | SCARB2   | -0.389368   | 0.66892433  | 1.05829233  | 1.05829233 |
| ESRRG     | ARHGEF6  | -0.32009378 | 0.738088    | 1.05818178  | 1.05818178 |
| CHPF      | HELLS    | -0.5650823  | 0.49297008  | 1.05805238  | 1.05805238 |
| LOC145783 | CHD1L    | -0.4630601  | 0.5948575   | 1.0579176   | 1.0579176  |
| DPT       | SSB      | -0.3243788  | 0.73349684  | 1.05787564  | 1.05787564 |
| ANXA11    | ELOVL5   | -0.58424765 | 0.47362718  | 1.05787483  | 1.05787483 |
| PINK1-AS  | IRF1     | 0.50855565  | -0.54918295 | -1.0577386  | 1.0577386  |
| CSF3R     | POLN     | 0.77685916  | -0.28087813 | -1.05773729 | 1.05773729 |
| ZNF608    | ZNF358   | 0.5461425   | -0.51144046 | -1.05758296 | 1.05758296 |
| GNAL      | SULF2    | 0.39457476  | -0.6629661  | -1.05754086 | 1.05754086 |
| SOAT1     | PNN      | -0.2505726  | 0.8069295   | 1.0575021   | 1.0575021  |
| CEP68     | PLD5     | 0.6101613   | -0.44726828 | -1.05742958 | 1.05742958 |
| ZNF467    | C11orf63 | 0.5066055   | -0.5506789  | -1.0572844  | 1.0572844  |
| KLF12     | MGEA5    | -0.15438832 | 0.9028337   | 1.05722202  | 1.05722202 |



|          |             |             |             |             |            |
|----------|-------------|-------------|-------------|-------------|------------|
| MIR3917  | NUDT21      | 0.69483787  | -0.3623577  | -1.05719557 | 1.05719557 |
| TRA2B    | COLGALT1    | 0.40071094  | -0.65647113 | -1.05718207 | 1.05718207 |
| SMAD7    | CADM1       | -0.3598246  | 0.69732666  | 1.05715126  | 1.05715126 |
| SOD2     | IL32        | 0.606067    | -0.45107317 | -1.05714017 | 1.05714017 |
| SOCS3    | TEAD4       | 0.6524287   | -0.40460655 | -1.05703525 | 1.05703525 |
| MAP1B    | TRIM14      | 0.56764406  | -0.4892745  | -1.05691856 | 1.05691856 |
| CDK6     | CHURC1-FNTB | -0.47587612 | 0.58088917  | 1.05676529  | 1.05676529 |
| CST2     | RCC2        | 0.4302196   | -0.6264897  | -1.0567093  | 1.0567093  |
| IPO11    | ELOVL6      | -0.6548725  | 0.4017521   | 1.0566246   | 1.0566246  |
| MCM6     | CBX3        | -0.23152962 | 0.8249951   | 1.05652472  | 1.05652472 |
| TXNL1    | SFN         | 0.4996491   | -0.5567894  | -1.0564385  | 1.0564385  |
| HTT      | OPRK1       | -0.63296664 | 0.42336932  | 1.05633596  | 1.05633596 |
| RACGAP1  | ARHGEF2     | -0.72430295 | 0.33197173  | 1.05627468  | 1.05627468 |
| ARNTL    | RRBP1       | -0.52673286 | 0.5294475   | 1.05618036  | 1.05618036 |
| CADM1    | KLHL5       | -0.503979   | 0.5519424   | 1.0559214   | 1.0559214  |
| EIF2B2   | SDPR        | -0.43458685 | 0.62129796  | 1.05588481  | 1.05588481 |
| SLIRP    | MSRB2       | -0.53900146 | 0.5168724   | 1.05587386  | 1.05587386 |
| GSTP1    | CXCL1       | 0.5178807   | -0.5379426  | -1.0558233  | 1.0558233  |
| S100B    | NPC1        | 0.4037654   | -0.65197974 | -1.05574514 | 1.05574514 |
| CSK      | DDB2        | -0.33645743 | 0.71927327  | 1.0557307   | 1.0557307  |
| NOL8     | MAN2B2      | -0.3443906  | 0.7111389   | 1.0555295   | 1.0555295  |
| RELB     | NUDT21      | 0.44620797  | -0.6092139  | -1.05542187 | 1.05542187 |
| PPP2CB   | ESRRG       | -0.41394582 | 0.64143634  | 1.05538216  | 1.05538216 |
| CCNI     | TUSC5       | 0.67978764  | -0.3755641  | -1.05535174 | 1.05535174 |
| GSTM5    | ZHX3        | 0.73642725  | -0.31890857 | -1.05533582 | 1.05533582 |
| ANPEP    | CHEK2       | -0.20598373 | 0.84924364  | 1.05522737  | 1.05522737 |
| GMPS     | RAE1        | 0.6628849   | -0.39232516 | -1.05521006 | 1.05521006 |
| BID      | BCL2        | -0.6409309  | 0.41418755  | 1.05511845  | 1.05511845 |
| MOB3B    | ZDHHC14     | 0.59123564  | -0.46381873 | -1.05505437 | 1.05505437 |
| LTA      | CD40        | 0.601374    | -0.45353138 | -1.05490538 | 1.05490538 |
| NAP1L1   | BID         | -0.6549522  | 0.39993054  | 1.05488274  | 1.05488274 |
| SH3PXD2A | PDLIM4      | -0.5195822  | 0.53528446  | 1.05486666  | 1.05486666 |
| COL15A1  | BRAP        | -0.4160169  | 0.6387723   | 1.0547892   | 1.0547892  |
| MMD      | COL5A1      | 0.65078276  | -0.40392917 | -1.05471193 | 1.05471193 |
| BRD8     | FAM43A      | -0.7272849  | 0.32736254  | 1.05464744  | 1.05464744 |
| PALLD    | CLRN1       | -0.49729368 | 0.55705845  | 1.05435213  | 1.05435213 |
| UBC      | PRR11       | -0.614702   | 0.43961152  | 1.05431352  | 1.05431352 |
| RBM10    | RELA        | -0.35043028 | 0.70381635  | 1.05424663  | 1.05424663 |
| SEC62    | NAB2        | 0.4987085   | -0.5555234  | -1.0542319  | 1.0542319  |
| ADAM10   | KCNE3       | 0.36800933  | -0.6861812  | -1.05419053 | 1.05419053 |
| GPLD1    | ABCG1       | 0.5192137   | -0.53493816 | -1.05415186 | 1.05415186 |
| HNRNPL   | SNRPD3      | 0.34499562  | -0.70912737 | -1.05412299 | 1.05412299 |
| SETD7    | FZD10       | 0.27529296  | -0.778769   | -1.05406196 | 1.05406196 |
| SOX4     | KIAA1033    | 0.5582844   | -0.495518   | -1.0538024  | 1.0538024  |
| LTF      | PRR14L      | 0.43856344  | -0.6150978  | -1.05366124 | 1.05366124 |
| ANAPC5   | COPRS       | 0.53447485  | -0.5191046  | -1.05357945 | 1.05357945 |
| MLXIP    | CNPY2       | -0.36125126 | 0.692223    | 1.05347426  | 1.05347426 |
| KCNK3    | RPL15       | -0.32752368 | 0.72585464  | 1.05337832  | 1.05337832 |
| TCF3     | LCMT2       | 0.60222477  | -0.45112443 | -1.0533492  | 1.0533492  |
| ACVR2A   | BGN         | 0.6797847   | -0.37340105 | -1.05318575 | 1.05318575 |
| XPO1     | APEX2       | -0.59609854 | 0.4567284   | 1.05282694  | 1.05282694 |
| CD1D     | TMEM44      | -0.411387   | 0.64143     | 1.052817    | 1.052817   |
| XRCC5    | KANK1       | -0.69177175 | 0.3609746   | 1.05274635  | 1.05274635 |
| PTPN11   | CADM1       | -0.60741264 | 0.4453332   | 1.05274584  | 1.05274584 |
| ARHGEF12 | KAT2A       | 0.53038126  | -0.5223104  | -1.05269166 | 1.05269166 |

|          |          |             |             |             |            |
|----------|----------|-------------|-------------|-------------|------------|
| BID      | ATF6B    | 0.6683252   | -0.38436595 | -1.05269115 | 1.05269115 |
| CADM1    | SULF2    | 0.41755238  | -0.6349583  | -1.05251068 | 1.05251068 |
| MCM4     | CDC7     | 0.6092091   | -0.44325283 | -1.05246193 | 1.05246193 |
| SH3RF1   | TBRG4    | -0.42614567 | 0.6262359   | 1.05238157  | 1.05238157 |
| PDE4DIP  | PDHB     | -0.3073981  | 0.74493796  | 1.05233606  | 1.05233606 |
| SIRPA    | EZH2     | -0.35275298 | 0.699506    | 1.05225898  | 1.05225898 |
| MED19    | MED16    | -0.37384227 | 0.6783539   | 1.05219617  | 1.05219617 |
| MMS19    | NUP188   | -0.5617481  | 0.4904292   | 1.0521773   | 1.0521773  |
| EPS15    | SNRPB2   | -0.41180673 | 0.6403269   | 1.05213363  | 1.05213363 |
| SORL1    | SHANK2   | 0.5011979   | -0.5509091  | -1.052107   | 1.052107   |
| CADM1    | NMT2     | -0.38732263 | 0.6647593   | 1.05208193  | 1.05208193 |
| PDIA4    | CLSTN1   | -0.21075134 | 0.8411412   | 1.05189254  | 1.05189254 |
| KIF5B    | DYSF     | 0.60151047  | -0.45036313 | -1.0518736  | 1.0518736  |
| CALD1    | GABBR1   | -0.45572054 | 0.5961504   | 1.05187094  | 1.05187094 |
| SOBP     | NEGR1    | -0.44301862 | 0.608837    | 1.05185562  | 1.05185562 |
| PCNA     | HLA-B    | -0.36643443 | 0.6853435   | 1.05177793  | 1.05177793 |
| CNTNAP1  | EGR1     | 0.24515824  | -0.8065911  | -1.05174934 | 1.05174934 |
| TK1      | EZH2     | 0.7490872   | -0.30250186 | -1.05158906 | 1.05158906 |
| SOD3     | MRPL14   | -0.6772582  | 0.37421054  | 1.05146874  | 1.05146874 |
| RAB35    | RAB11A   | 0.7514887   | -0.29974625 | -1.05123495 | 1.05123495 |
| PIAS2    | PSMA4    | -0.41506597 | 0.636161    | 1.05122697  | 1.05122697 |
| KLF12    | ADARB1   | 0.34229413  | -0.7087858  | -1.05107993 | 1.05107993 |
| NXF1     | NUP62    | -0.4826116  | 0.5684447   | 1.0510563   | 1.0510563  |
| TNFRSF21 | BST2     | -0.69831544 | 0.35246345  | 1.05077889  | 1.05077889 |
| TRIM23   | SEC61A1  | 0.46398365  | -0.5867762  | -1.05075985 | 1.05075985 |
| SYCP2    | AGPAT5   | -0.4788812  | 0.57174605  | 1.05062725  | 1.05062725 |
| ADA      | LUC7L3   | -0.4742921  | 0.5760813   | 1.0503734   | 1.0503734  |
| ESRRG    | GRB14    | -0.27712205 | 0.77323735  | 1.0503594   | 1.0503594  |
| BCL2     | PRICKLE1 | 0.2665354   | -0.78372824 | -1.05026364 | 1.05026364 |
| ASS1     | GTF2I    | -0.30180913 | 0.7484409   | 1.05025003  | 1.05025003 |
| KARS     | CSDE1    | -0.5289772  | 0.5211677   | 1.0501449   | 1.0501449  |
| CCT3     | ADGRA2   | -0.538114   | 0.5119274   | 1.0500414   | 1.0500414  |
| MCM6     | PCED1B   | -0.6652462  | 0.38476378  | 1.05000998  | 1.05000998 |
| PGRMC2   | QSOX1    | 0.39224347  | -0.6577087  | -1.04995217 | 1.04995217 |
| PAPSS1   | SSB      | 0.55446607  | -0.49533793 | -1.049804   | 1.049804   |
| MRPS14   | PHF5A    | -0.43329734 | 0.6164956   | 1.04979294  | 1.04979294 |
| ZFP36L1  | ACACA    | 0.27449283  | -0.7751763  | -1.04966913 | 1.04966913 |
| TBC1D9B  | PRICKLE1 | 0.47176006  | -0.5776979  | -1.04945796 | 1.04945796 |
| GNAL     | PDHB     | -0.4774985  | 0.57179093  | 1.04928943  | 1.04928943 |
| MFAP3    | LMOD3    | 0.5492044   | -0.49990308 | -1.04910748 | 1.04910748 |
| COL9A1   | CNTNAP1  | 0.52074915  | -0.5281838  | -1.04893295 | 1.04893295 |
| ZNF202   | MZF1     | -0.3873601  | 0.66122246  | 1.04858256  | 1.04858256 |
| FDPS     | IL17A    | 0.29252443  | -0.756044   | -1.04856843 | 1.04856843 |
| SRPRB    | NDN      | -0.60432875 | 0.44418642  | 1.04851517  | 1.04851517 |
| ENOSF1   | C19orf25 | -0.7200807  | 0.32843304  | 1.04851374  | 1.04851374 |
| CHD2     | JDP2     | 0.33857828  | -0.7098905  | -1.04846878 | 1.04846878 |
| MFAP3    | VLDLR    | -0.34317157 | 0.7052399   | 1.04841147  | 1.04841147 |
| COL15A1  | PALLD    | 0.44554472  | -0.60267806 | -1.04822278 | 1.04822278 |
| MFAP3    | AHI1     | 0.7251813   | -0.32302037 | -1.04820167 | 1.04820167 |
| DCUN1D5  | ZNF608   | -0.23773271 | 0.81041855  | 1.04815126  | 1.04815126 |
| WARS     | CD48     | 0.49212626  | -0.5558259  | -1.04795216 | 1.04795216 |
| CEACAM1  | CCDC90B  | -0.72654366 | 0.32124338  | 1.04778704  | 1.04778704 |
| VLDLR    | THBS3    | 0.84219384  | -0.20549887 | -1.04769271 | 1.04769271 |
| SGCB     | GSTM5    | 0.65492535  | -0.39276636 | -1.04769171 | 1.04769171 |
| KCND2    | TIMM23   | -0.4389272  | 0.60861665  | 1.04754385  | 1.04754385 |

|           |          |             |             |             |            |
|-----------|----------|-------------|-------------|-------------|------------|
| KARS      | NAALADL2 | -0.4804996  | 0.5668296   | 1.0473292   | 1.0473292  |
| FOXJ2     | TMEM159  | -0.39228848 | 0.6550155   | 1.04730398  | 1.04730398 |
| MFAP3     | PCOLCE2  | -0.56945455 | 0.47775447  | 1.04720902  | 1.04720902 |
| EIF4G3    | GPAT4    | -0.6514671  | 0.395676    | 1.0471431   | 1.0471431  |
| KIAA0391  | TMEM55A  | -0.6127537  | 0.43436942  | 1.04712312  | 1.04712312 |
| STK10     | SLC7A2   | -0.28649062 | 0.760574    | 1.04706462  | 1.04706462 |
| MFAP3     | SPAG16   | -0.49868765 | 0.54835427  | 1.04704192  | 1.04704192 |
| HDAC1     | GTF2I    | -0.7143855  | 0.33260393  | 1.04698943  | 1.04698943 |
| FGFR1OP   | KLF8     | -0.5015241  | 0.5452778   | 1.0468019   | 1.0468019  |
| PPIB      | HNRNPL   | 0.5447583   | -0.50198734 | -1.04674564 | 1.04674564 |
| GNAQ      | TRIM2    | 0.41882876  | -0.62769246 | -1.04652122 | 1.04652122 |
| ORMDL1    | DPAGT1   | -0.15945718 | 0.8870628   | 1.04651998  | 1.04651998 |
| LARP6     | CACNB3   | 0.47321734  | -0.5732762  | -1.04649354 | 1.04649354 |
| CAB39     | OLMALINC | -0.51176226 | 0.534677    | 1.04643926  | 1.04643926 |
| HSP90AA1  | PPIB     | 0.52669966  | -0.5197287  | -1.04642836 | 1.04642836 |
| COPZ1     | NMT2     | -0.5477581  | 0.49856973  | 1.04632783  | 1.04632783 |
| KPNA4     | CELSR1   | 0.3136188   | -0.7326517  | -1.0462705  | 1.0462705  |
| NDFIP2    | HSPB8    | -0.5175481  | 0.5286341   | 1.0461822   | 1.0461822  |
| TXNIP     | SMAD7    | -0.48638016 | 0.55969864  | 1.0460788   | 1.0460788  |
| PARK2     | QDPR     | -0.4740202  | 0.5719785   | 1.0459987   | 1.0459987  |
| DHX30     | PARP14   | -0.41891614 | 0.6270429   | 1.04595904  | 1.04595904 |
| DIEXF     | SLC27A3  | -0.28055808 | 0.7653786   | 1.04593668  | 1.04593668 |
| COPZ1     | ZNF608   | -0.24882361 | 0.79709685  | 1.04592046  | 1.04592046 |
| GNAL      | ADAMTS3  | 0.30518827  | -0.7407072  | -1.04589547 | 1.04589547 |
| C14orf169 | CHD2     | -0.623068   | 0.4228157   | 1.0458837   | 1.0458837  |
| ENG       | LMOD3    | 0.35931674  | -0.6864625  | -1.04577924 | 1.04577924 |
| QKI       | MOCOS    | -0.59548956 | 0.45025384  | 1.0457434   | 1.0457434  |
| KIF5B     | CDCA7    | 0.30175483  | -0.74394983 | -1.04570466 | 1.04570466 |
| GRB14     | MLST8    | 0.5475147   | -0.49806637 | -1.04558107 | 1.04558107 |
| FAM129B   | TIMM23   | 0.4257001   | -0.61983716 | -1.04553726 | 1.04553726 |
| ARPP21    | DFNB31   | 0.5369075   | -0.50839543 | -1.04530293 | 1.04530293 |
| GFOD1     | STAT3    | 0.39264286  | -0.65258837 | -1.04523123 | 1.04523123 |
| ZMYND11   | GNPTAB   | -0.67343086 | 0.37175542  | 1.04518628  | 1.04518628 |
| SLC26A7   | MMP15    | 0.7468732   | -0.29815334 | -1.04502654 | 1.04502654 |
| KIRREL    | AAGAB    | -0.47012866 | 0.5748902   | 1.04501886  | 1.04501886 |
| ARPP21    | KLHL5    | -0.7031152  | 0.3417744   | 1.0448896   | 1.0448896  |
| DCN       | MAP6     | 0.6892586   | -0.35560963 | -1.04486823 | 1.04486823 |
| SNRPB2    | NFIA     | -0.5310772  | 0.51375294  | 1.04483014  | 1.04483014 |
| NAB1      | RACGAP1  | -0.44849393 | 0.59631956  | 1.04481349  | 1.04481349 |
| PDE4DIP   | DCUN1D5  | -0.32123178 | 0.72346514  | 1.04469692  | 1.04469692 |
| FAM13A    | QSOX1    | 0.34101415  | -0.7036178  | -1.04463195 | 1.04463195 |
| DHX30     | LHPP     | 0.5381742   | -0.50640064 | -1.04457484 | 1.04457484 |
| TAOK3     | MAPK13   | -0.55625266 | 0.48827466  | 1.04452732  | 1.04452732 |
| GNA12     | CCDC117  | 0.53229994  | -0.51215833 | -1.04445827 | 1.04445827 |
| TBC1D1    | FOS      | 0.6649155   | -0.3793902  | -1.0443057  | 1.0443057  |
| CBX3      | DDX39A   | -0.2496942  | 0.7946061   | 1.0443003   | 1.0443003  |
| GSTM5     | NMNAT3   | 0.6613754   | -0.38283393 | -1.04420933 | 1.04420933 |
| UBC       | NFATC2IP | -0.7758697  | 0.26826587  | 1.04413557  | 1.04413557 |
| CCDC3     | ZNF804A  | -0.52149564 | 0.52260965  | 1.04410529  | 1.04410529 |
| NAP1L1    | CD40     | -0.6689553  | 0.37472323  | 1.04367853  | 1.04367853 |
| COX7A1    | PRICKLE1 | 0.38136372  | -0.6622498  | -1.04361352 | 1.04361352 |
| B4GALT1   | EFCAB14  | -0.47539866 | 0.568168    | 1.04356666  | 1.04356666 |
| UBE2B     | DLC1     | -0.40951625 | 0.6340003   | 1.04351655  | 1.04351655 |
| BLOC1S6   | ABI2     | 0.50106245  | -0.54237187 | -1.04343432 | 1.04343432 |
| DSG2      | LAP3     | -0.561092   | 0.48223433  | 1.04332633  | 1.04332633 |

|          |              |             |             |             |            |
|----------|--------------|-------------|-------------|-------------|------------|
| VEGFA    | PFDN4        | 0.3751019   | -0.66815436 | -1.04325626 | 1.04325626 |
| COL1A1   | SDC2         | 0.40228355  | -0.6409002  | -1.04318375 | 1.04318375 |
| RBM17    | SOX4         | 0.5145349   | -0.5285694  | -1.0431043  | 1.0431043  |
| SPEF2    | HDAC1        | 0.32791173  | -0.71518135 | -1.04309308 | 1.04309308 |
| NAP1L1   | GGCT         | -0.47741047 | 0.565671    | 1.04308147  | 1.04308147 |
| PGRMC2   | COL5A1       | 0.5299159   | -0.513119   | -1.0430349  | 1.0430349  |
| XRCC5    | DSG2         | -0.4345746  | 0.60840905  | 1.04298365  | 1.04298365 |
| KARS     | COL15A1      | -0.628381   | 0.41450608  | 1.04288708  | 1.04288708 |
| TUSC3    | LOC100996693 | 0.26444727  | -0.77832395 | -1.04277122 | 1.04277122 |
| ZHX2     | CEP68        | 0.5992194   | -0.44353366 | -1.04275306 | 1.04275306 |
| MFAP3    | RPRD1A       | -0.3977638  | 0.6449698   | 1.0427336   | 1.0427336  |
| PTPRG    | RANGAP1      | 0.28849638  | -0.75415957 | -1.04265595 | 1.04265595 |
| MYOM1    | ARPC5L       | -0.67755723 | 0.36501363  | 1.04257086  | 1.04257086 |
| CBX3     | NOP56        | -0.47170082 | 0.570689    | 1.04238982  | 1.04238982 |
| WDR46    | FAM111A      | -0.34244785 | 0.6998829   | 1.04233075  | 1.04233075 |
| ISCU     | HDAC1        | -0.69876736 | 0.34350276  | 1.04227012  | 1.04227012 |
| TBL1XR1  | ZNF467       | 0.61419743  | -0.42797476 | -1.04217219 | 1.04217219 |
| AGTRAP   | SIRPA        | -0.28929263 | 0.75282866  | 1.04212129  | 1.04212129 |
| TRIM2    | RAB5A        | -0.38376266 | 0.65829146  | 1.04205412  | 1.04205412 |
| PUS1     | PFDN4        | 0.4085287   | -0.6334686  | -1.0419973  | 1.0419973  |
| NGFR     | TMOD2        | -0.39564335 | 0.64618427  | 1.04182762  | 1.04182762 |
| NAALADL2 | SNRPC        | -0.70690274 | 0.3349186   | 1.04182134  | 1.04182134 |
| IL18     | HIVEP3       | 0.5012096   | -0.540407   | -1.0416166  | 1.0416166  |
| FGFR2    | PRMT8        | -0.7113129  | 0.3302864   | 1.0415993   | 1.0415993  |
| GYS1     | MCM3         | -0.5137019  | 0.5278243   | 1.0415262   | 1.0415262  |
| LNPEP    | MEST         | -0.48771605 | 0.553736    | 1.04145205  | 1.04145205 |
| TRMT13   | MTHFD1L      | -0.46659797 | 0.57477415  | 1.04137212  | 1.04137212 |
| TAOK3    | AGPAT5       | -0.45886242 | 0.58244586  | 1.04130828  | 1.04130828 |
| CSNK2A1  | FAM171A1     | -0.5112556  | 0.5300114   | 1.041267    | 1.041267   |
| CCT3     | TSPAN9       | 0.5441426   | -0.4970458  | -1.0411884  | 1.0411884  |
| POC1A    | WRAP53       | 0.5938008   | -0.44731456 | -1.04111536 | 1.04111536 |
| DCUN1D5  | HLA-C        | -0.44687223 | 0.5940498   | 1.04092203  | 1.04092203 |
| ZFP36L1  | WDR27        | -0.31012595 | 0.7307512   | 1.04087715  | 1.04087715 |
| SNRPB2   | SCARB2       | -0.42779824 | 0.613042    | 1.04084024  | 1.04084024 |
| SEPT11   | PARP14       | 0.3131131   | -0.7276701  | -1.0407832  | 1.0407832  |
| CAST     | ABI2         | 0.35160077  | -0.6891022  | -1.04070297 | 1.04070297 |
| KPNA4    | LIF          | 0.31533054  | -0.7251153  | -1.04044584 | 1.04044584 |
| APC      | STX17        | -0.4837778  | 0.5566598   | 1.0404376   | 1.0404376  |
| UBC      | MRPL9        | -0.4282755  | 0.61211324  | 1.04038874  | 1.04038874 |
| ARHGEF12 | TSPAN9       | 0.66705835  | -0.37325087 | -1.04030922 | 1.04030922 |
| PRICKLE1 | LIMCH1       | 0.29907086  | -0.741181   | -1.04025186 | 1.04025186 |
| GLRB     | SLC25A29     | 0.41750827  | -0.62270796 | -1.04021623 | 1.04021623 |
| UBC      | ZWILCH       | -0.45063546 | 0.5895613   | 1.04019676  | 1.04019676 |
| NXF1     | AMMECR1      | 0.39274746  | -0.6473658  | -1.04011326 | 1.04011326 |
| NOL10    | INIP         | 0.5997481   | -0.44035807 | -1.04010617 | 1.04010617 |
| YARS     | THRB         | -0.5472102  | 0.4928512   | 1.0400614   | 1.0400614  |
| DCUN1D5  | UCK2         | 0.4070761   | -0.6329758  | -1.0400519  | 1.0400519  |
| FHOD1    | PHF8         | -0.19157404 | 0.8483885   | 1.03996254  | 1.03996254 |
| MLST8    | ETV3         | 0.4143207   | -0.62559277 | -1.03991347 | 1.03991347 |
| MAP4     | PRICKLE1     | 0.4514179   | -0.5884929  | -1.0399108  | 1.0399108  |
| ATG2A    | EGR1         | 0.49253404  | -0.5471933  | -1.03972734 | 1.03972734 |
| FKBP1A   | CXCL2        | 0.6416518   | -0.39799577 | -1.03964757 | 1.03964757 |
| ELOVL6   | TNS1         | 0.7976853   | -0.24186252 | -1.03954782 | 1.03954782 |
| KLF12    | DDX52        | 0.27579054  | -0.7637471  | -1.03953764 | 1.03953764 |
| ENO3     | APP          | -0.54132617 | 0.49819472  | 1.03952089  | 1.03952089 |

|         |          |             |             |             |            |
|---------|----------|-------------|-------------|-------------|------------|
| PDZRN3  | STX6     | -0.70179147 | 0.33764938  | 1.03944085  | 1.03944085 |
| SSB     | IL20RA   | -0.5957018  | 0.44373775  | 1.03943955  | 1.03943955 |
| XRCC5   | CBX3     | -0.46476158 | 0.57459176  | 1.03935334  | 1.03935334 |
| TEX264  | C8orf33  | -0.3618476  | 0.6774701   | 1.0393177   | 1.0393177  |
| AIMP1   | PFDN4    | 0.6637982   | -0.37550443 | -1.03930263 | 1.03930263 |
| LPCAT3  | GRM5     | 0.29389578  | -0.745328   | -1.03922378 | 1.03922378 |
| SERBP1  | NAB1     | -0.492146   | 0.5470439   | 1.0391899   | 1.0391899  |
| KLF9    | PCBP2    | 0.4381724   | -0.6008576  | -1.03903    | 1.03903    |
| NEGR1   | RNF207   | 0.3447052   | -0.69423765 | -1.03894285 | 1.03894285 |
| KLF12   | TIMELESS | 0.39968038  | -0.6392183  | -1.03889868 | 1.03889868 |
| TOP2A   | GART     | 0.47573778  | -0.56289303 | -1.03863081 | 1.03863081 |
| UBC     | NUP62    | -0.48331717 | 0.5552413   | 1.03855847  | 1.03855847 |
| GEM     | ADGRA2   | 0.84813964  | -0.19013816 | -1.0382778  | 1.0382778  |
| PFDN4   | ZFAT     | -0.30514    | 0.732819    | 1.037959    | 1.037959   |
| PDIA4   | PDE7A    | 0.5145663   | -0.52337146 | -1.03793776 | 1.03793776 |
| APC     | KANSL2   | -0.5523659  | 0.4855669   | 1.0379328   | 1.0379328  |
| ZMYND11 | NLN      | -0.6781927  | 0.35972685  | 1.03791955  | 1.03791955 |
| MYOC    | NAB2     | 0.44379443  | -0.59403217 | -1.0378266  | 1.0378266  |
| CELSR1  | RSL1D1   | 0.5039399   | -0.53367823 | -1.03761813 | 1.03761813 |
| SNRPE   | LPCAT2   | 0.2599312   | -0.7775508  | -1.037482   | 1.037482   |
| AIDA    | ZNF467   | 0.73784983  | -0.2994327  | -1.03728253 | 1.03728253 |
| RPS20   | NAB2     | 0.5995236   | -0.43772703 | -1.03725063 | 1.03725063 |
| ZWINT   | ZHX2     | -0.55164146 | 0.48557505  | 1.03721651  | 1.03721651 |
| KIF5B   | COLGALT1 | 0.6077021   | -0.4294876  | -1.0371897  | 1.0371897  |
| PPA1    | NPY1R    | -0.32389528 | 0.71316755  | 1.03706283  | 1.03706283 |
| GNAQ    | FUT11    | -0.3656538  | 0.67132443  | 1.03697823  | 1.03697823 |
| FADD    | ABCA1    | -0.475611   | 0.56128794  | 1.03689894  | 1.03689894 |
| PCNA    | TEFM     | -0.5488623  | 0.48797062  | 1.03683292  | 1.03683292 |
| CHD1L   | MRPL50   | -0.69399107 | 0.34282964  | 1.03682071  | 1.03682071 |
| CIAO1   | DCAF8    | -0.49166837 | 0.54513663  | 1.036805    | 1.036805   |
| ANPEP   | NVL      | -0.7225654  | 0.31420976  | 1.03677516  | 1.03677516 |
| ATP5G1  | ELK1     | 0.6416416   | -0.39504275 | -1.03668435 | 1.03668435 |
| NDN     | TRO      | 0.50662     | -0.5299099  | -1.0365299  | 1.0365299  |
| CCT3    | NAALADL2 | -0.5647555  | 0.47177148  | 1.03652698  | 1.03652698 |
| UCK2    | SLC25A29 | -0.7492678  | 0.2872406   | 1.0365084   | 1.0365084  |
| ZEB1    | CEP68    | 0.7654562   | -0.27102298 | -1.03647918 | 1.03647918 |
| GLRB    | POPDC3   | -0.46629128 | 0.570133    | 1.03642428  | 1.03642428 |
| NEDD4L  | WARS     | -0.45386338 | 0.58227366  | 1.03613704  | 1.03613704 |
| CELSR1  | SAMD4A   | 0.5183231   | -0.5175415  | -1.0358646  | 1.0358646  |
| CHD2    | AIDA     | 0.48558083  | -0.5502739  | -1.03585473 | 1.03585473 |
| QSOX1   | EHBP1    | 0.5051014   | -0.53072274 | -1.03582414 | 1.03582414 |
| CCDC90B | TBC1D1   | -0.42032644 | 0.6154796   | 1.03580604  | 1.03580604 |
| AQP4    | INF2     | -0.27603653 | 0.75969374  | 1.03573027  | 1.03573027 |
| RBM17   | PRR11    | -0.7653841  | 0.27030256  | 1.03568666  | 1.03568666 |
| LMOD3   | DNAJC9   | 0.42174283  | -0.6138938  | -1.03563663 | 1.03563663 |
| TEX264  | B3GALT6  | -0.30114    | 0.73442364  | 1.03556364  | 1.03556364 |
| IGF2R   | CALD1    | 0.60491306  | -0.43061996 | -1.03553302 | 1.03553302 |
| PLA2G6  | MTHFR    | -0.43202198 | 0.6034918   | 1.03551378  | 1.03551378 |
| COG6    | EIF4E3   | -0.67340034 | 0.36202094  | 1.03542128  | 1.03542128 |
| ENOSF1  | RAB3IP   | 0.502487    | -0.53282756 | -1.03531456 | 1.03531456 |
| TDRKH   | SIRPA    | -0.6608403  | 0.37436622  | 1.03520652  | 1.03520652 |
| CBX3    | XPO5     | -0.15654816 | 0.87864614  | 1.0351943   | 1.0351943  |
| WDR59   | ELP6     | 0.41266167  | -0.6225241  | -1.03518577 | 1.03518577 |
| DDX6    | PRMT8    | -0.50367117 | 0.53148115  | 1.03515232  | 1.03515232 |
| CYBRD1  | EFEMP2   | 0.8488493   | -0.18618727 | -1.03503657 | 1.03503657 |



|            |          |             |             |             |            |
|------------|----------|-------------|-------------|-------------|------------|
| KLF12      | TIAL1    | 0.12928444  | -0.9057491  | -1.03503354 | 1.03503354 |
| FAM43A     | MZF1     | -0.47880104 | 0.55618066  | 1.0349817   | 1.0349817  |
| SPAG16     | CIAO1    | -0.64560777 | 0.38934416  | 1.03495193  | 1.03495193 |
| KMT2E      | RTP4     | 0.62693214  | -0.40790692 | -1.03483906 | 1.03483906 |
| HNRNPA1    | KSR1     | -0.36348936 | 0.67134404  | 1.0348334   | 1.0348334  |
| SGCB       | TDRKH    | -0.7395721  | 0.2950623   | 1.0346344   | 1.0346344  |
| ECM2       | FOPNL    | -0.45931375 | 0.5751916   | 1.03450535  | 1.03450535 |
| LRRC16A    | LZTS1    | -0.5200607  | 0.51440674  | 1.03446744  | 1.03446744 |
| ADGRA2     | DDX28    | -0.65620947 | 0.37822583  | 1.0344353   | 1.0344353  |
| C10orf11   | NETO2    | -0.6356633  | 0.39873466  | 1.03439796  | 1.03439796 |
| TSPAN9     | CNOT11   | 0.60545003  | -0.42890885 | -1.03435888 | 1.03435888 |
| SPEF2      | PUS1     | 0.27356523  | -0.7607524  | -1.03431763 | 1.03431763 |
| COL15A1    | PNPT1    | -0.5443172  | 0.48986238  | 1.03417958  | 1.03417958 |
| ADAM19     | B4GALT6  | 0.6007335   | -0.4332813  | -1.0340148  | 1.0340148  |
| ZWINT      | LDLRAD4  | -0.7026666  | 0.3311873   | 1.0338539   | 1.0338539  |
| FGF18      | EIF4E3   | 0.55959564  | -0.47419903 | -1.03379467 | 1.03379467 |
| CTNNA1     | POLR2H   | -0.3523461  | 0.68129164  | 1.03363774  | 1.03363774 |
| GABPB1-AS1 | RELA     | -0.65619236 | 0.3774069   | 1.03359926  | 1.03359926 |
| TRIM27     | KANSL1   | -0.72186345 | 0.31165707  | 1.03352052  | 1.03352052 |
| MOCS2      | SPIRE2   | -0.7578467  | 0.2756572   | 1.0335039   | 1.0335039  |
| SET        | SOX4     | -0.6915944  | 0.3418464   | 1.0334408   | 1.0334408  |
| AFF3       | GALNT2   | -0.58811027 | 0.4452732   | 1.03338347  | 1.03338347 |
| FAM204A    | GTPBP8   | -0.59882    | 0.4344991   | 1.0333191   | 1.0333191  |
| ANKRD28    | TEAD4    | -0.51011187 | 0.52319604  | 1.03330791  | 1.03330791 |
| PDE5A      | DCN      | 0.611574    | -0.4217225  | -1.0332965  | 1.0332965  |
| MCM3       | CBX3     | -0.28231075 | 0.7509167   | 1.03322745  | 1.03322745 |
| BUB1B      | PRR11    | 0.92271215  | -0.11049035 | -1.0332025  | 1.0332025  |
| KIF13A     | TEC      | 0.40670556  | -0.6264632  | -1.03316876 | 1.03316876 |
| MCM4       | RACGAP1  | 0.82585716  | -0.20700018 | -1.03285734 | 1.03285734 |
| APC        | C19orf25 | -0.35791075 | 0.6749284   | 1.03283915  | 1.03283915 |
| TCF3       | SEH1L    | 0.6875104   | -0.34528542 | -1.03279582 | 1.03279582 |
| ASB1       | MRPS22   | -0.4069531  | 0.6258296   | 1.0327827   | 1.0327827  |
| DCN        | KANK1    | 0.7766999   | -0.2558911  | -1.032591   | 1.032591   |
| SRPRB      | TCEA3    | -0.82368064 | 0.20877823  | 1.03245887  | 1.03245887 |
| UBE2B      | AHCYL1   | 0.8783563   | -0.15404168 | -1.03239798 | 1.03239798 |
| LMO3       | KCNO4    | -0.3001947  | 0.7321482   | 1.0323429   | 1.0323429  |
| ABI2       | SREK1IP1 | 0.5666971   | -0.46564087 | -1.03233797 | 1.03233797 |
| UBC        | C1orf131 | -0.31514254 | 0.7171173   | 1.03225984  | 1.03225984 |
| IGF1R      | MIR503   | -0.4806599  | 0.55153584  | 1.03219574  | 1.03219574 |
| MMP14      | CRISPLD2 | -0.48225474 | 0.5499379   | 1.03219264  | 1.03219264 |
| PPIA       | HLA-C    | -0.36266574 | 0.66943187  | 1.03209761  | 1.03209761 |
| NFIA       | PSMG3    | -0.66287035 | 0.36913937  | 1.03200972  | 1.03200972 |
| NFASC      | MAGOHB   | -0.653534   | 0.37844336  | 1.03197736  | 1.03197736 |
| MCM6       | PDE7A    | 0.49507388  | -0.53680456 | -1.03187844 | 1.03187844 |
| MMD        | CERS5    | 0.58359927  | -0.44826642 | -1.03186569 | 1.03186569 |
| POLR2D     | SPAG5    | 0.45957318  | -0.5722736  | -1.03184678 | 1.03184678 |
| CREBL2     | RAB11A   | -0.4663718  | 0.5654246   | 1.0317964   | 1.0317964  |
| ADAMTS9    | RAB13    | 0.72674745  | -0.30500972 | -1.03175717 | 1.03175717 |
| VCAM1      | ARHGEF37 | 0.6025595   | -0.42916957 | -1.03172907 | 1.03172907 |
| RRM1       | FARSA    | -0.2662156  | 0.765486    | 1.0317016   | 1.0317016  |
| STAT5B     | C8orf4   | -0.5565181  | 0.4750577   | 1.0315758   | 1.0315758  |
| PALLD      | URI1     | -0.4685031  | 0.56289935  | 1.03140245  | 1.03140245 |
| ZNF467     | ZNF668   | -0.32876667 | 0.70259833  | 1.031365    | 1.031365   |
| OLMALINC   | SERPINE2 | -0.5921834  | 0.4390673   | 1.0312507   | 1.0312507  |
| TSPAN9     | TSKU     | -0.6240109  | 0.4072222   | 1.0312331   | 1.0312331  |

|          |          |             |             |             |            |
|----------|----------|-------------|-------------|-------------|------------|
| ESRRG    | FOXN3    | -0.5227986  | 0.5083067   | 1.0311053   | 1.0311053  |
| GMPS     | SSBP2    | -0.21834011 | 0.81268436  | 1.03102447  | 1.03102447 |
| LHPP     | PIKFYVE  | -0.49753594 | 0.5332293   | 1.03076524  | 1.03076524 |
| DPT      | CELSR1   | 0.3486929   | -0.68205345 | -1.03074635 | 1.03074635 |
| KLF12    | ADPGK    | 0.2211915   | -0.8095449  | -1.0307364  | 1.0307364  |
| MRPL17   | CAB39L   | -0.8894879  | 0.14118452  | 1.03067242  | 1.03067242 |
| XRCC5    | TMEM229B | 0.776413    | -0.25419906 | -1.03061206 | 1.03061206 |
| MMS19    | JDP2     | 0.42286512  | -0.6076294  | -1.03049452 | 1.03049452 |
| ZNF385D  | GFRA4    | 0.5188879   | -0.5114443  | -1.0303322  | 1.0303322  |
| POLR2C   | MAN2B2   | -0.3239741  | 0.7063514   | 1.0303255   | 1.0303255  |
| KIF5B    | ALS2     | -0.8687759  | 0.16146761  | 1.03024351  | 1.03024351 |
| UBC      | ZWINT    | -0.5954513  | 0.4346751   | 1.0301264   | 1.0301264  |
| PALLD    | ENG      | 0.38916737  | -0.6409297  | -1.03009707 | 1.03009707 |
| DNMT1    | RTN4     | -0.6279068  | 0.40212762  | 1.03003442  | 1.03003442 |
| EPS15    | MPHOSPH6 | -0.72660255 | 0.30341598  | 1.03001853  | 1.03001853 |
| UBE2H    | BMP1     | 0.40749657  | -0.6225093  | -1.03000587 | 1.03000587 |
| DAZAP1   | MTHFSD   | 0.2493642   | -0.78062314 | -1.02998734 | 1.02998734 |
| ICK      | CDK1     | -0.7219814  | 0.3079972   | 1.0299786   | 1.0299786  |
| KDR      | TRIT1    | -0.32605776 | 0.7039109   | 1.02996866  | 1.02996866 |
| TRAF3IP1 | MRPL17   | -0.8489572  | 0.18100812  | 1.02996532  | 1.02996532 |
| UBC      | PNPT1    | -0.3008409  | 0.7290713   | 1.0299122   | 1.0299122  |
| INTS6    | CRYZL1   | 0.47843194  | -0.5513783  | -1.02981024 | 1.02981024 |
| PIAS2    | ARHGEF12 | -0.42594686 | 0.6037454   | 1.02969226  | 1.02969226 |
| PTTG1    | QSOX1    | -0.39310318 | 0.63647926  | 1.02958244  | 1.02958244 |
| ZNF608   | NOL8     | -0.18272212 | 0.8468528   | 1.02957492  | 1.02957492 |
| UBC      | RACGAP1  | -0.46169287 | 0.56786346  | 1.02955633  | 1.02955633 |
| COLGALT1 | DPH6     | 0.66833854  | -0.3611955  | -1.02953404 | 1.02953404 |
| TRIM23   | MITF     | -0.6136239  | 0.41576347  | 1.02938737  | 1.02938737 |
| COPB1    | AP3M1    | -0.6126713  | 0.41671422  | 1.02938552  | 1.02938552 |
| TRIAP1   | TLN2     | -0.48838192 | 0.5409843   | 1.02936622  | 1.02936622 |
| ALDOB    | HELLS    | 0.48257044  | -0.5467494  | -1.02931984 | 1.02931984 |
| TRIM27   | FAXDC2   | -0.5034771  | 0.52584046  | 1.02931756  | 1.02931756 |
| MRPL17   | RNASE4   | -0.83940625 | 0.18989287  | 1.02929912  | 1.02929912 |
| UNC5C    | RGS22    | -0.4054801  | 0.62379605  | 1.02927615  | 1.02927615 |
| PTPRN2   | CEBPD    | -0.46329662 | 0.56596243  | 1.02925905  | 1.02925905 |
| TNFRSF25 | CARD9    | -0.6458339  | 0.383341    | 1.0291749   | 1.0291749  |
| RNF150   | NIPA2    | -0.6643482  | 0.36482283  | 1.02917103  | 1.02917103 |
| PRMT8    | SNX18    | -0.5463055  | 0.48281428  | 1.02911978  | 1.02911978 |
| ADAM22   | NDFIP2   | -0.76740295 | 0.2616655   | 1.02906845  | 1.02906845 |
| TCEB3    | TMEM55A  | -0.47537768 | 0.5536517   | 1.02902938  | 1.02902938 |
| PFKP     | SP3      | -0.48757517 | 0.54140615  | 1.02898132  | 1.02898132 |
| RRM1     | LPIN1    | -0.24263    | 0.7863321   | 1.0289621   | 1.0289621  |
| NOD1     | CASP2    | 0.37777826  | -0.6510643  | -1.02884256 | 1.02884256 |
| ENG      | SOX30    | 0.296265    | -0.73232484 | -1.02858984 | 1.02858984 |
| UBC      | CHTF8    | -0.52843076 | 0.50010014  | 1.0285309   | 1.0285309  |
| GAPDH    | APOL2    | 0.49661225  | -0.5319167  | -1.02852895 | 1.02852895 |
| DNAJB1   | ATG2A    | 0.6785055   | -0.35001776 | -1.02852326 | 1.02852326 |
| SNRPB2   | EPS8     | -0.44844052 | 0.58005977  | 1.02850029  | 1.02850029 |
| COL5A1   | C1QTNF6  | -0.38592166 | 0.6423114   | 1.02823306  | 1.02823306 |
| SSB      | DCAF13   | 0.7445243   | -0.2836994  | -1.0282237  | 1.0282237  |
| UBC      | DNMT1    | -0.32775608 | 0.70042276  | 1.02817884  | 1.02817884 |
| APC      | TMED5    | -0.43034574 | 0.59760207  | 1.02794781  | 1.02794781 |
| ARHGEF12 | MRPS14   | -0.7452     | 0.28270724  | 1.02790724  | 1.02790724 |
| TRIM27   | EGR1     | 0.5319095   | -0.4959182  | -1.0278277  | 1.0278277  |
| AP3S2    | ITGA8    | 0.7282328   | -0.29944316 | -1.02767596 | 1.02767596 |

|          |           |             |             |             |            |
|----------|-----------|-------------|-------------|-------------|------------|
| SMYD3    | EGR3      | 0.5972799   | -0.43034786 | -1.02762776 | 1.02762776 |
| ITGB6    | PDHB      | -0.6707922  | 0.3568106   | 1.0276028   | 1.0276028  |
| UBC      | SPCS3     | -0.4892903  | 0.53821254  | 1.02750284  | 1.02750284 |
| HDAC1    | HDAC11    | -0.74961543 | 0.27786276  | 1.02747819  | 1.02747819 |
| SSB      | VLDLR     | -0.5854291  | 0.44197744  | 1.02740654  | 1.02740654 |
| FOXM1    | DNAJC9    | 0.8464383   | -0.18082832 | -1.02726662 | 1.02726662 |
| VAMP4    | PRICKLE4  | -0.4352695  | 0.5919224   | 1.0271919   | 1.0271919  |
| SRGAP1   | TEX264    | -0.44430655 | 0.58288395  | 1.0271905   | 1.0271905  |
| EFCAB14  | PHF8      | -0.29353324 | 0.73354805  | 1.02708129  | 1.02708129 |
| SPCS3    | PDZRN3    | -0.70202744 | 0.32495576  | 1.0269832   | 1.0269832  |
| RAB11A   | OPTN      | -0.6281144  | 0.39885807  | 1.02697247  | 1.02697247 |
| UBC      | ESRRG     | -0.5287906  | 0.49817026  | 1.02696086  | 1.02696086 |
| ZWINT    | ADAMTS2   | -0.4301445  | 0.59681475  | 1.02695925  | 1.02695925 |
| METTL3   | HIST1H2BE | -0.39994228 | 0.6269651   | 1.02690738  | 1.02690738 |
| DCUN1D5  | THRB      | -0.2646342  | 0.7620404   | 1.0266746   | 1.0266746  |
| ADAMTS2  | SF3B3     | -0.45045102 | 0.57615924  | 1.02661026  | 1.02661026 |
| CHMP3    | PDHB      | -0.42775026 | 0.59885186  | 1.02660212  | 1.02660212 |
| BMP15    | SRGAP1    | 0.48213637  | -0.5443701  | -1.02650647 | 1.02650647 |
| APBB2    | ESRP2     | -0.83698076 | 0.18950616  | 1.02648692  | 1.02648692 |
| PELP1    | NOL9      | 0.4768944   | -0.54959106 | -1.02648546 | 1.02648546 |
| NDN      | ZSCAN20   | -0.42882723 | 0.5975785   | 1.02640573  | 1.02640573 |
| AMOT     | HSPA14    | 0.30245754  | -0.7239107  | -1.02636824 | 1.02636824 |
| ASS1     | TULP4     | -0.3765541  | 0.6497265   | 1.0262806   | 1.0262806  |
| ADAMTS9  | CERS5     | -0.29290265 | 0.73330355  | 1.0262062   | 1.0262062  |
| DNAJC15  | ARHGEF12  | -0.60403    | 0.42188603  | 1.02591603  | 1.02591603 |
| SERPINA1 | CLSTN1    | -0.25358465 | 0.7721847   | 1.02576935  | 1.02576935 |
| MYL12A   | GSTT2     | 0.41860285  | -0.6071105  | -1.02571335 | 1.02571335 |
| SHC1     | FOS       | 0.6320755   | -0.39358795 | -1.02566345 | 1.02566345 |
| TRMT61A  | ARHGEF12  | 0.6353267   | -0.39033276 | -1.02565946 | 1.02565946 |
| NFATC2IP | GTF2I     | -0.8375108  | 0.18807742  | 1.02558822  | 1.02558822 |
| MAPKAPK3 | SCML2     | 0.31488982  | -0.71055484 | -1.02544466 | 1.02544466 |
| C10orf11 | C11orf98  | -0.5099717  | 0.5154145   | 1.0253862   | 1.0253862  |
| NEGR1    | METTL17   | 0.3706643   | -0.65464675 | -1.02531105 | 1.02531105 |
| SOX4     | C11orf63  | 0.526317    | -0.49899322 | -1.02531022 | 1.02531022 |
| MFAP3    | USP9X     | -0.35276905 | 0.67248553  | 1.02525458  | 1.02525458 |
| SORBS1   | COL5A1    | 0.4843188   | -0.54093426 | -1.02525306 | 1.02525306 |
| SLC37A4  | SLC46A3   | -0.6315035  | 0.39373267  | 1.02523617  | 1.02523617 |
| PRMT8    | FIP1L1    | -0.62608415 | 0.3991349   | 1.02521905  | 1.02521905 |
| TNFRSF21 | MCTP1     | -0.73910713 | 0.28611016  | 1.02521729  | 1.02521729 |
| GEMIN8   | SLC10A3   | -0.3887627  | 0.6363357   | 1.0250984   | 1.0250984  |
| FLNB     | FANCG     | -0.6194927  | 0.40556452  | 1.02505722  | 1.02505722 |
| SIRPA    | NPY1R     | 0.69340265  | -0.33160493 | -1.02500758 | 1.02500758 |
| NUTF2    | ELK1      | 0.6047881   | -0.42019868 | -1.02498678 | 1.02498678 |
| DNAJC9   | DNAJC21   | -0.67156607 | 0.35332018  | 1.02488625  | 1.02488625 |
| NDEL1    | ARMC12    | -0.6316308  | 0.39321792  | 1.02484872  | 1.02484872 |
| EHBP1    | COG6      | -0.8083609  | 0.21630715  | 1.02466805  | 1.02466805 |
| ZNF678   | ZNF57     | -0.6328187  | 0.39182907  | 1.02464777  | 1.02464777 |
| RUSC1    | HIST1H1D  | -0.5983412  | 0.4262306   | 1.0245718   | 1.0245718  |
| PDE4DIP  | ERP44     | -0.42722142 | 0.5973411   | 1.02456252  | 1.02456252 |
| PRMT8    | FBN1      | -0.75142187 | 0.27307254  | 1.02449441  | 1.02449441 |
| PIKFYVE  | ACTN3     | -0.4993772  | 0.5250647   | 1.0244419   | 1.0244419  |
| PRR14L   | DCUN1D3   | -0.7945128  | 0.22991288  | 1.02442568  | 1.02442568 |
| CETP     | TYMP      | -0.2518611  | 0.7725562   | 1.0244173   | 1.0244173  |
| CCM2     | SIRPA     | 0.6864418   | -0.33794615 | -1.02438795 | 1.02438795 |
| DTL      | DMXL2     | -0.4491099  | 0.57510203  | 1.02421193  | 1.02421193 |

|          |              |             |             |             |            |
|----------|--------------|-------------|-------------|-------------|------------|
| ALDOB    | PCNA         | 0.49608478  | -0.527948   | -1.02403278 | 1.02403278 |
| SYNPO    | RTN4RL1      | -0.59227926 | 0.43174714  | 1.0240264   | 1.0240264  |
| LARP6    | MST1R        | 0.2261858   | -0.7977904  | -1.0239762  | 1.0239762  |
| KCNK5    | EGR1         | 0.42119253  | -0.6026887  | -1.02388123 | 1.02388123 |
| DCN      | ZNF219       | 0.62513894  | -0.39868784 | -1.02382678 | 1.02382678 |
| TRIT1    | ABI2         | 0.5868255   | -0.43696958 | -1.02379508 | 1.02379508 |
| RGS5     | PCIF1        | -0.55720353 | 0.46658245  | 1.02378598  | 1.02378598 |
| ALAD     | YME1L1       | 0.6822843   | -0.34144855 | -1.02373285 | 1.02373285 |
| APRT     | NFIA         | -0.67783356 | 0.34561756  | 1.02345112  | 1.02345112 |
| NAB2     | RTN3         | 0.31388634  | -0.709467   | -1.02335334 | 1.02335334 |
| PPIL2    | STX6         | -0.35221702 | 0.6710907   | 1.02330772  | 1.02330772 |
| GDF5     | FIGF         | -0.26984397 | 0.7534625   | 1.02330647  | 1.02330647 |
| SSRP1    | PFDN4        | 0.4182255   | -0.60507095 | -1.02329645 | 1.02329645 |
| ARHGEF37 | FNBP4        | 0.41336522  | -0.6099282  | -1.02329342 | 1.02329342 |
| UCK2     | PNPT1        | 0.5816153   | -0.44155154 | -1.02316684 | 1.02316684 |
| EPS8     | HPS6         | -0.69223696 | 0.33090472  | 1.02314168  | 1.02314168 |
| PHPT1    | NDUFC1       | 0.41712958  | -0.60594803 | -1.02307761 | 1.02307761 |
| AP1G2    | AAGAB        | -0.4089178  | 0.614151    | 1.0230688   | 1.0230688  |
| INO80D   | ADAM19       | 0.5618741   | -0.46114182 | -1.02301592 | 1.02301592 |
| PPIL2    | TRIM21       | -0.36593443 | 0.6570427   | 1.02297713  | 1.02297713 |
| DPT      | NAB2         | 0.28147966  | -0.74148715 | -1.02296681 | 1.02296681 |
| IDS      | EIF4G3       | 0.443661    | -0.5793027  | -1.0229637  | 1.0229637  |
| CYR61    | PLSCR3       | 0.62723523  | -0.3956817  | -1.02291693 | 1.02291693 |
| KLF12    | CCT3         | 0.21877795  | -0.8040697  | -1.02284765 | 1.02284765 |
| C12orf49 | PDE7A        | 0.45849186  | -0.56422037 | -1.02271223 | 1.02271223 |
| DCN      | CFLAR        | 0.7275438   | -0.2951516  | -1.0226954  | 1.0226954  |
| INTS6    | ZNF518B      | 0.5054756   | -0.51721066 | -1.02268626 | 1.02268626 |
| PTGR2    | CHD2         | 0.8484891   | -0.17415233 | -1.02264143 | 1.02264143 |
| TARBP2   | SOX4         | -0.39476502 | 0.6278764   | 1.02264142  | 1.02264142 |
| CSNK2A1  | CLASP2       | 0.17319344  | -0.8492957  | -1.02248914 | 1.02248914 |
| FGF18    | FAM171A1     | 0.5571291   | -0.46532574 | -1.02245484 | 1.02245484 |
| TBL1XR1  | NFIB         | 0.6898865   | -0.3325553  | -1.0224418  | 1.0224418  |
| POLK     | RAB35        | -0.58040804 | 0.4419827   | 1.02239074  | 1.02239074 |
| WNK1     | LOC101060175 | 0.687173    | -0.33516017 | -1.02233317 | 1.02233317 |
| COL4A1   | VLDLR        | -0.2917448  | 0.7305824   | 1.0223272   | 1.0223272  |
| ADAMTS9  | TLL2         | 0.5437577   | -0.478506   | -1.0222637  | 1.0222637  |
| GLRB     | ZDHHC14      | 0.26660615  | -0.75563323 | -1.02223938 | 1.02223938 |
| SRSF1    | MTHFSD       | 0.23373093  | -0.7883633  | -1.02209423 | 1.02209423 |
| HIVEP3   | LY75         | 0.54583085  | -0.47623718 | -1.02206803 | 1.02206803 |
| CALR     | LPCAT3       | 0.37176648  | -0.65020335 | -1.02196983 | 1.02196983 |
| SNRPB2   | DPP3         | 0.7793292   | -0.2426178  | -1.021947   | 1.021947   |
| UTP18    | HDAC11       | -0.56325465 | 0.45862553  | 1.02188018  | 1.02188018 |
| NVL      | YME1L1       | -0.39797315 | 0.62374735  | 1.0217205   | 1.0217205  |
| TOP2A    | DNAJC9       | 0.8227552   | -0.19892383 | -1.02167903 | 1.02167903 |
| TAOK3    | SLIRP        | -0.38735926 | 0.63425756  | 1.02161682  | 1.02161682 |
| GALNT11  | PRELID1      | -0.48817664 | 0.53319865  | 1.02137529  | 1.02137529 |
| CRYZL1   | IRF1         | 0.43683097  | -0.5845212  | -1.02135217 | 1.02135217 |
| GDAP2    | ZDHHC16      | -0.3783108  | 0.64303756  | 1.02134836  | 1.02134836 |
| INO80D   | FAM104B      | -0.46550158 | 0.5557695   | 1.02127108  | 1.02127108 |
| TPO      | CLPB         | -0.47697285 | 0.5442968   | 1.02126965  | 1.02126965 |
| GRWD1    | WDR86        | -0.50986075 | 0.5113806   | 1.02124135  | 1.02124135 |
| SLC22A4  | GFOD1        | 0.60649365  | -0.4147337  | -1.02122735 | 1.02122735 |
| DKC1     | CDKN3        | 0.7189434   | -0.3022623  | -1.0212057  | 1.0212057  |
| PTPRN2   | SLAMF1       | -0.6077708  | 0.41324285  | 1.02101365  | 1.02101365 |
| TBL1X    | MYL9         | -0.58657503 | 0.43443647  | 1.0210115   | 1.0210115  |

|          |          |             |             |             |            |
|----------|----------|-------------|-------------|-------------|------------|
| MCM6     | LDLRAD4  | -0.5184038  | 0.5024719   | 1.0208757   | 1.0208757  |
| MCM8     | SPIRE2   | 0.8246      | -0.19624789 | -1.02084789 | 1.02084789 |
| ORC5     | CCDC57   | -0.52925044 | 0.49158594  | 1.02083638  | 1.02083638 |
| RPS21    | NUDCD2   | 0.37932038  | -0.64150405 | -1.02082443 | 1.02082443 |
| SLC25A13 | CHPF     | -0.49241516 | 0.52837515  | 1.02079031  | 1.02079031 |
| ZBTB44   | KRT76    | -0.46628693 | 0.5544887   | 1.02077563  | 1.02077563 |
| CDCA7    | PFDN4    | 0.4525375   | -0.56822664 | -1.02076414 | 1.02076414 |
| IDH2     | ACTN3    | 0.4062896   | -0.61441994 | -1.02070954 | 1.02070954 |
| CCT3     | SNX29    | -0.4803862  | 0.5403145   | 1.0207007   | 1.0207007  |
| NAB1     | DHX30    | -0.5271526  | 0.49345413  | 1.02060673  | 1.02060673 |
| MYOC     | OLFML2B  | 0.4769116   | -0.54368937 | -1.02060097 | 1.02060097 |
| EFCAB14  | ALDH1A1  | 0.59092927  | -0.42965785 | -1.02058712 | 1.02058712 |
| CLEC3B   | INPP5F   | -0.46156004 | 0.5590027   | 1.02056274  | 1.02056274 |
| ZHX3     | PDIA6    | -0.54771525 | 0.47275174  | 1.02046699  | 1.02046699 |
| STX6     | TLL2     | 0.43782914  | -0.5825822  | -1.02041134 | 1.02041134 |
| ASB6     | ASB14    | 0.27414504  | -0.7462184  | -1.02036344 | 1.02036344 |
| ZWINT    | PDE4DIP  | -0.8203206  | 0.19987099  | 1.02019159  | 1.02019159 |
| COL15A1  | LCMT2    | -0.5322731  | 0.48774     | 1.0200131   | 1.0200131  |
| EPS15    | ESRRG    | -0.47418997 | 0.54574496  | 1.01993493  | 1.01993493 |
| ZCCHC24  | IRF1     | 0.39271316  | -0.6271717  | -1.01988486 | 1.01988486 |
| NFIA     | EMC6     | -0.39338788 | 0.62637     | 1.01975788  | 1.01975788 |
| PTPRG    | TPBG     | -0.41762957 | 0.6020361   | 1.01966567  | 1.01966567 |
| SH3KBP1  | PI3      | -0.74509525 | 0.27453977  | 1.01963502  | 1.01963502 |
| APC      | AGPAT5   | -0.46867555 | 0.5509405   | 1.01961605  | 1.01961605 |
| SDC2     | GSTM5    | 0.72626686  | -0.29309803 | -1.01936489 | 1.01936489 |
| FGF18    | CRYZL1   | 0.5957361   | -0.423605   | -1.0193411  | 1.0193411  |
| UBE2H    | PFDN4    | -0.4290003  | 0.590329    | 1.0193293   | 1.0193293  |
| ABCA1    | PHF8     | -0.15681529 | 0.8624868   | 1.01930209  | 1.01930209 |
| COL1A1   | BMPER    | 0.36320028  | -0.65603197 | -1.01923225 | 1.01923225 |
| HIVEP3   | ZNF467   | 0.50646406  | -0.5126283  | -1.01909236 | 1.01909236 |
| CYTH2    | PHLDB2   | 0.54781055  | -0.4710974  | -1.01890795 | 1.01890795 |
| AGPAT5   | SLC43A2  | 0.5513128   | -0.46757987 | -1.01889267 | 1.01889267 |
| RAB21    | RAB30    | 0.8183601   | -0.20050614 | -1.01886624 | 1.01886624 |
| PARP9    | NTNG2    | 0.2547608   | -0.7639992  | -1.01876    | 1.01876    |
| STAC     | POLDIP3  | 0.32839075  | -0.6903522  | -1.01874295 | 1.01874295 |
| TUFM     | ELK1     | 0.6273179   | -0.39128417 | -1.01860207 | 1.01860207 |
| PRMT1    | CBX3     | -0.19390346 | 0.82464266  | 1.01854612  | 1.01854612 |
| RBM17    | OLA1     | -0.48164925 | 0.5366872   | 1.01833645  | 1.01833645 |
| SERPINA1 | SERPINA3 | 0.6813133   | -0.33701327 | -1.01832657 | 1.01832657 |
| RSPO3    | ZC3H3    | 0.52901226  | -0.48925084 | -1.0182631  | 1.0182631  |
| CD69     | SPIN3    | -0.42560267 | 0.5926242   | 1.01822687  | 1.01822687 |
| NFIA     | BST2     | -0.63429135 | 0.38390917  | 1.01820052  | 1.01820052 |
| PDE4DIP  | FGFR1OP2 | -0.6609982  | 0.35716468  | 1.01816288  | 1.01816288 |
| GNAL     | MTURN    | -0.526709   | 0.49145225  | 1.01816125  | 1.01816125 |
| PAPPA    | SIKE1    | 0.40446433  | -0.61369157 | -1.0181559  | 1.0181559  |
| CEACAM1  | PCDH9    | -0.30821407 | 0.709896    | 1.01811007  | 1.01811007 |
| CAP2     | TBRG4    | -0.5453762  | 0.47270718  | 1.01808338  | 1.01808338 |
| IL18BP   | MZF1     | -0.4698849  | 0.5481761   | 1.018061    | 1.018061   |
| SOX4     | MXRA7    | 0.28715548  | -0.7309028  | -1.01805828 | 1.01805828 |
| OLMALINC | SUSD1    | -0.35087055 | 0.66718245  | 1.018053    | 1.018053   |
| IDS      | SRD5A1   | -0.57768935 | 0.44015127  | 1.01784062  | 1.01784062 |
| MAP4     | CDK5     | -0.43759292 | 0.5802      | 1.01779292  | 1.01779292 |
| CAST     | MFAP3    | -0.35101223 | 0.6667126   | 1.01772483  | 1.01772483 |
| FUT11    | IRF4     | -0.7126118  | 0.30494672  | 1.01755852  | 1.01755852 |
| SEPT11   | ARPP21   | -0.45455053 | 0.56297314  | 1.01752367  | 1.01752367 |



|         |          |             |             |             |            |
|---------|----------|-------------|-------------|-------------|------------|
| COL15A1 | EPB41L4A | 0.40781572  | -0.60970277 | -1.01751849 | 1.01751849 |
| DPP3    | PHF5A    | 0.84020734  | -0.17728823 | -1.01749557 | 1.01749557 |
| SDPR    | ELP6     | -0.70581025 | 0.31167537  | 1.01748562  | 1.01748562 |
| AGPAT5  | ASB1     | -0.25459918 | 0.7628178   | 1.01741698  | 1.01741698 |
| ARPP21  | AIMP1    | -0.71708494 | 0.30029     | 1.01737494  | 1.01737494 |
| STAT1   | MCM5     | -0.47085145 | 0.54647344  | 1.01732489  | 1.01732489 |
| ATG2A   | JUND     | 0.6876541   | -0.32965648 | -1.01731058 | 1.01731058 |
| FGFR1OP | ARHGEF37 | -0.7152923  | 0.30197272  | 1.01726502  | 1.01726502 |
| ANKRD28 | ANKRD35  | 0.555438    | -0.4617809  | -1.0172189  | 1.0172189  |
| MRPS14  | PDHB     | -0.1122128  | 0.9049839   | 1.0171967   | 1.0171967  |
| XRCC5   | CSRP2BP  | -0.4900771  | 0.5271104   | 1.0171875   | 1.0171875  |
| YWHAG   | CCND2    | -0.5877914  | 0.42935923  | 1.01715063  | 1.01715063 |
| GEMIN4  | RRBP1    | -0.59273326 | 0.42439115  | 1.01712441  | 1.01712441 |
| PLCB4   | NUDCD2   | -0.6758708  | 0.3412433   | 1.0171141   | 1.0171141  |
| RBPJ    | RGS3     | -0.6044895  | 0.41260615  | 1.01709565  | 1.01709565 |
| ARPP21  | PPP1R1B  | 0.5226021   | -0.49444985 | -1.01705195 | 1.01705195 |
| IGF1R   | ITGA8    | 0.55609614  | -0.4609524  | -1.01704854 | 1.01704854 |
| GAPDH   | BIK      | 0.6658838   | -0.3511205  | -1.0170043  | 1.0170043  |
| MITF    | SOX4     | 0.26411024  | -0.75275457 | -1.01686481 | 1.01686481 |
| NOL8    | SPEF2    | 0.13370235  | -0.88316005 | -1.0168624  | 1.0168624  |
| FOXN3   | FGF18    | 0.4097972   | -0.606977   | -1.0167742  | 1.0167742  |
| RAB5A   | ZNF101   | 0.49935406  | -0.5172664  | -1.01662046 | 1.01662046 |
| ENG     | BCAR1    | 0.5847919   | -0.4317761  | -1.016568   | 1.016568   |
| STK10   | ADPGK    | -0.21074618 | 0.8058027   | 1.01654888  | 1.01654888 |
| NOL9    | PNPLA4   | -0.6630562  | 0.3534824   | 1.0165386   | 1.0165386  |
| DNAJB1  | DNAJB2   | 0.74878323  | -0.26775053 | -1.01653376 | 1.01653376 |
| TRMT61A | NPM1     | 0.5847137   | -0.43176496 | -1.01647866 | 1.01647866 |
| BUB1B   | SEH1L    | 0.69831747  | -0.31802306 | -1.01634053 | 1.01634053 |
| CTNNA1  | NEGR1    | 0.26825455  | -0.7480327  | -1.01628725 | 1.01628725 |
| EZH2    | KIF11    | 0.9297178   | -0.0864649  | -1.0161827  | 1.0161827  |
| ZBTB20  | STX6     | -0.71395874 | 0.30187958  | 1.01583832  | 1.01583832 |
| SLU7    | IFT81    | 0.57286364  | -0.4429489  | -1.01581254 | 1.01581254 |
| EIF5    | NAALADL2 | -0.43546405 | 0.5802863   | 1.01575035  | 1.01575035 |
| PTTG1   | KIF11    | 0.9471319   | -0.06858051 | -1.01571241 | 1.01571241 |
| ITGB5   | ITGA8    | 0.7221714   | -0.2935384  | -1.0157098  | 1.0157098  |
| PFKP    | PLEKHH1  | -0.3470002  | 0.66859305  | 1.01559325  | 1.01559325 |
| PPM1A   | PSMB3    | -0.62532    | 0.39023435  | 1.01555435  | 1.01555435 |
| SCARB2  | RPL14    | -0.22240694 | 0.7931292   | 1.01553614  | 1.01553614 |
| TRIAP1  | S100A16  | 0.7716256   | -0.24383022 | -1.01545582 | 1.01545582 |
| AUP1    | STAT3    | -0.3896823  | 0.6257452   | 1.0154275   | 1.0154275  |
| LDLRAD4 | C3orf17  | -0.27362216 | 0.74169827  | 1.01532043  | 1.01532043 |
| HNRNPC  | PFDN4    | 0.50954646  | -0.5057586  | -1.01530506 | 1.01530506 |
| TPO     | VEGFA    | -0.6319347  | 0.3833653   | 1.0153      | 1.0153     |
| MFAP3   | SREK1IP1 | -0.26243332 | 0.75278187  | 1.01521519  | 1.01521519 |
| GRM5    | NEXN     | -0.6389045  | 0.3762686   | 1.0151731   | 1.0151731  |
| UBE2B   | MAP4     | 0.56445485  | -0.45064545 | -1.0151003  | 1.0151003  |
| ZMYND11 | CERS5    | 0.65670764  | -0.3583908  | -1.01509844 | 1.01509844 |
| CSNK2A1 | PGRMC2   | -0.34943253 | 0.6656352   | 1.01506773  | 1.01506773 |
| MMD     | COL6A3   | 0.72003794  | -0.29494998 | -1.01498792 | 1.01498792 |
| UNC5C   | ZHX1     | -0.38391554 | 0.6310707   | 1.01498624  | 1.01498624 |
| DPT     | LTBP4    | 0.7509451   | -0.26400438 | -1.01494948 | 1.01494948 |
| DIEXF   | AP3S2    | -0.49131978 | 0.5236195   | 1.01493928  | 1.01493928 |
| GART    | ZBTB10   | -0.35772038 | 0.6571158   | 1.01483618  | 1.01483618 |
| COL1A1  | EFEMP2   | 0.7572437   | -0.25757506 | -1.01481876 | 1.01481876 |
| NEDD4L  | IL18     | 0.5598418   | -0.4549476  | -1.0147894  | 1.0147894  |

|          |          |             |             |             |            |
|----------|----------|-------------|-------------|-------------|------------|
| RSU1     | RBM45    | -0.50191414 | 0.51271206  | 1.0146262   | 1.0146262  |
| KLF12    | DIEXF    | 0.21240428  | -0.8021883  | -1.01459258 | 1.01459258 |
| TBL1X    | RGS3     | -0.27797696 | 0.7365691   | 1.01454606  | 1.01454606 |
| ZNF426   | EFEMP2   | 0.70492     | -0.30955058 | -1.01447058 | 1.01447058 |
| SERBP1   | GTF2I    | -0.6768561  | 0.33753642  | 1.01439252  | 1.01439252 |
| PCDH17   | PRUNE2   | -0.38235447 | 0.6319389   | 1.01429337  | 1.01429337 |
| RNF141   | PRICKLE1 | 0.5657229   | -0.44844952 | -1.01417242 | 1.01417242 |
| THRB     | CPXM1    | 0.6972968   | -0.31681237 | -1.01410917 | 1.01410917 |
| CADM1    | EIF4E3   | -0.351293   | 0.66273415  | 1.01402715  | 1.01402715 |
| TXNL1    | ZNF148   | -0.32929957 | 0.6847198   | 1.01401937  | 1.01401937 |
| UBC      | CDCA7    | -0.6005413  | 0.41344166  | 1.01398296  | 1.01398296 |
| MBNL1    | ZDHC14   | 0.39781263  | -0.61598516 | -1.01379779 | 1.01379779 |
| ADPGK    | STIM2    | -0.26837116 | 0.74537337  | 1.01374453  | 1.01374453 |
| GTF3C2   | WDR13    | -0.44955206 | 0.5641723   | 1.01372436  | 1.01372436 |
| HDAC11   | RACGAP1  | -0.74822325 | 0.26549965  | 1.0137229   | 1.0137229  |
| KIAA0101 | SCML2    | 0.48726758  | -0.5264521  | -1.01371968 | 1.01371968 |
| FADS2    | SAMD4A   | -0.78100336 | 0.232625    | 1.01362836  | 1.01362836 |
| ESRRG    | DNAJB2   | -0.7207885  | 0.29283985  | 1.01362835  | 1.01362835 |
| SEPT11   | TGM2     | 0.36117458  | -0.6524439  | -1.01361848 | 1.01361848 |
| SYNPO2   | WDR27    | 0.71380424  | -0.29962647 | -1.01343071 | 1.01343071 |
| MGAT5    | SPEF2    | -0.38521558 | 0.6282024   | 1.01341798  | 1.01341798 |
| STX8     | PI3      | -0.7003583  | 0.31301668  | 1.01337498  | 1.01337498 |
| ESRRG    | TM9SF3   | -0.6734337  | 0.33994097  | 1.01337467  | 1.01337467 |
| SF3B3    | TM4SF18  | -0.5906618  | 0.4226918   | 1.0133536   | 1.0133536  |
| LDLRAD4  | GALNT2   | -0.514632   | 0.4986503   | 1.0132823   | 1.0132823  |
| EZH2     | ZBTB10   | -0.61711895 | 0.3960668   | 1.01318575  | 1.01318575 |
| ZWINT    | IDS      | -0.74559355 | 0.26758662  | 1.01318017  | 1.01318017 |
| HSD17B6  | LOX      | 0.5539628   | -0.45918292 | -1.01314572 | 1.01314572 |
| WARS     | LCA5     | -0.52122456 | 0.4918225   | 1.01304706  | 1.01304706 |
| KSR1     | DDR2     | 0.32826757  | -0.68470216 | -1.01296973 | 1.01296973 |
| XRCC5    | MMD      | -0.7595924  | 0.25331447  | 1.01290687  | 1.01290687 |
| APC      | EIF2B2   | -0.53113896 | 0.4817596   | 1.01289856  | 1.01289856 |
| SRPRB    | PCED1B   | -0.5745016  | 0.4383527   | 1.0128543   | 1.0128543  |
| YARS     | KLF12    | 0.33122638  | -0.68156374 | -1.01279012 | 1.01279012 |
| SP3      | IKZF1    | -0.6090331  | 0.40366527  | 1.01269837  | 1.01269837 |
| INIP     | POLR2H   | 0.35994872  | -0.65258366 | -1.01253238 | 1.01253238 |
| RPN2     | AUP1     | -0.26980424 | 0.7427143   | 1.01251854  | 1.01251854 |
| ITCH     | NUDT21   | -0.4098869  | 0.6026237   | 1.0125106   | 1.0125106  |
| XPO1     | TBC1D1   | -0.47593957 | 0.536549    | 1.01248857  | 1.01248857 |
| XRCC5    | RNF150   | -0.7663775  | 0.24609463  | 1.01247213  | 1.01247213 |
| FGFR10P  | ADAMTS2  | -0.24287716 | 0.7695445   | 1.01242166  | 1.01242166 |
| ARPP19   | ZNF804A  | -0.5362439  | 0.47613883  | 1.01238273  | 1.01238273 |
| CEACAM1  | MRPS14   | -0.3461353  | 0.6662169   | 1.0123522   | 1.0123522  |
| SMC4     | CDKN3    | 0.6344135   | -0.37780628 | -1.01221978 | 1.01221978 |
| EPS15    | LAP3     | -0.29534665 | 0.7168355   | 1.01218215  | 1.01218215 |
| XRCC5    | EPHA1    | 0.39036962  | -0.6217799  | -1.01214952 | 1.01214952 |
| GNAQ     | MRPS22   | -0.42248216 | 0.5896349   | 1.01211706  | 1.01211706 |
| COL27A1  | TMEM44   | -0.29941037 | 0.71270514  | 1.01211551  | 1.01211551 |
| COL1A1   | LAMA1    | -0.49565515 | 0.5162164   | 1.01187155  | 1.01187155 |
| SPIRE1   | CNPY2    | -0.6239854  | 0.38781157  | 1.01179697  | 1.01179697 |
| BUB1B    | STK36    | -0.4585298  | 0.5530535   | 1.0115833   | 1.0115833  |
| SIRPA    | ATP6VOE2 | 0.67627406  | -0.33519983 | -1.01147389 | 1.01147389 |
| MFAP3    | CLK2     | -0.38286507 | 0.6285899   | 1.01145497  | 1.01145497 |
| FOXN3    | COL6A3   | 0.64071393  | -0.37057492 | -1.01128885 | 1.01128885 |
| SIKE1    | ADAMTS9  | 0.32159525  | -0.6896513  | -1.01124655 | 1.01124655 |

|           |              |             |             |             |            |
|-----------|--------------|-------------|-------------|-------------|------------|
| USP4      | TYRO3        | -0.4974518  | 0.5137369   | 1.0111887   | 1.0111887  |
| KCNAB1    | SOX4         | 0.37379915  | -0.6373416  | -1.01114075 | 1.01114075 |
| CBX4      | CHCHD7       | 0.3418739   | -0.6692452  | -1.0111191  | 1.0111191  |
| SAP30L    | TM2D2        | -0.25857148 | 0.75254625  | 1.01111773  | 1.01111773 |
| LDLRAD4   | CCT3         | -0.5140807  | 0.49695292  | 1.01103362  | 1.01103362 |
| ZNF142    | ZNF704       | 0.3135289   | -0.69737774 | -1.01090664 | 1.01090664 |
| ANKRD28   | NUP62        | -0.5595331  | 0.45136604  | 1.01089914  | 1.01089914 |
| DYSF      | STK36        | -0.44145682 | 0.5694143   | 1.01087112  | 1.01087112 |
| CDCA7     | DCAF7        | -0.6054801  | 0.40531844  | 1.01079854  | 1.01079854 |
| EMC6      | ADM          | -0.22301282 | 0.7877839   | 1.01079672  | 1.01079672 |
| GGCT      | OGFR         | 0.7303114   | -0.28046572 | -1.01077712 | 1.01077712 |
| PCCB      | CEACAM1      | 0.53249294  | -0.4782593  | -1.01075224 | 1.01075224 |
| VCAM1     | ZNF397       | 0.270888    | -0.7398598  | -1.0107478  | 1.0107478  |
| ANKRD28   | NUDCD2       | -0.53264374 | 0.47800788  | 1.01065162  | 1.01065162 |
| NEFH      | SLC24A4      | -0.38160095 | 0.6289831   | 1.01058405  | 1.01058405 |
| ITGA8     | C6orf106     | 0.6392115   | -0.37132594 | -1.01053744 | 1.01053744 |
| SERPINA1  | MRPL47       | 0.70047975  | -0.3100381  | -1.01051785 | 1.01051785 |
| EPS15     | AMMECR1      | 0.46777925  | -0.5427329  | -1.01051215 | 1.01051215 |
| STAT3     | CLSTN1       | -0.20614776 | 0.80432075  | 1.01046851  | 1.01046851 |
| SERBP1    | ADGRA2       | -0.7642088  | 0.24621964  | 1.01042844  | 1.01042844 |
| KLHL34    | C11orf31     | 0.42322686  | -0.5871063  | -1.01033316 | 1.01033316 |
| PPM1A     | C10orf54     | 0.542703    | -0.46755177 | -1.01025477 | 1.01025477 |
| ANPEP     | SCRN1        | 0.4413265   | -0.56890965 | -1.01023615 | 1.01023615 |
| OXR1      | LCMT2        | -0.4562652  | 0.55396676  | 1.01023196  | 1.01023196 |
| LBP       | DPAGT1       | 0.81884664  | -0.1913326  | -1.01017924 | 1.01017924 |
| DUSP3     | CADM1        | -0.4576887  | 0.5524847   | 1.0101734   | 1.0101734  |
| KAT6B     | LOC100996693 | -0.3607878  | 0.6493609   | 1.0101487   | 1.0101487  |
| PIK3CA    | PSMA4        | -0.5868149  | 0.42331916  | 1.01013406  | 1.01013406 |
| CAST      | SCML2        | -0.8043349  | 0.20574313  | 1.01007803  | 1.01007803 |
| MARK1     | HPS6         | -0.50879985 | 0.50127786  | 1.01007771  | 1.01007771 |
| NFIA      | NIPA2        | -0.49248338 | 0.51759255  | 1.01007593  | 1.01007593 |
| ALS2      | RAB11A       | -0.50009054 | 0.509985    | 1.01007554  | 1.01007554 |
| PDE5A     | WARS         | -0.32110018 | 0.6889469   | 1.01004708  | 1.01004708 |
| CTNNA1    | CPXM1        | -0.37139064 | 0.63864774  | 1.01003838  | 1.01003838 |
| NIPA2     | RGS22        | -0.5015964  | 0.50833696  | 1.00993336  | 1.00993336 |
| SNRPB2    | LMO3         | -0.7394573  | 0.2701803   | 1.0096376   | 1.0096376  |
| NFKB2     | MST1R        | -0.45549497 | 0.55406046  | 1.00955543  | 1.00955543 |
| KIF5B     | IPO9         | 0.39395198  | -0.61545825 | -1.00941023 | 1.00941023 |
| GALNS     | SAFB2        | -0.54471445 | 0.46466997  | 1.00938442  | 1.00938442 |
| SSBP2     | SLC41A2      | -0.53732353 | 0.47201544  | 1.00933897  | 1.00933897 |
| MRPS14    | AGPAT5       | -0.46083724 | 0.5484789   | 1.00931614  | 1.00931614 |
| HIST1H2AD | PHF8         | 0.6892322   | -0.32004553 | -1.00927773 | 1.00927773 |
| ARHGEF12  | FAM149A      | -0.72355026 | 0.28562987  | 1.00918013  | 1.00918013 |
| TMED3     | PPP1R1B      | -0.5874202  | 0.42175734  | 1.00917754  | 1.00917754 |
| PI3       | PGM2         | 0.30540434  | -0.70357835 | -1.00898269 | 1.00898269 |
| ADSL      | ARHGEF37     | -0.5732755  | 0.43569013  | 1.00896563  | 1.00896563 |
| EIF4G3    | KCMF1        | 0.648673    | -0.36029136 | -1.00896436 | 1.00896436 |
| KIRREL    | LRP8         | -0.7324652  | 0.27639434  | 1.00885954  | 1.00885954 |
| IP6K2     | GPT          | 0.66114163  | -0.3475086  | -1.00865023 | 1.00865023 |
| WDR59     | SLIRP        | 0.32823607  | -0.68037677 | -1.00861284 | 1.00861284 |
| ZFR       | EFHD1        | -0.43768242 | 0.5709007   | 1.00858312  | 1.00858312 |
| LOC145783 | MLC1         | 0.45112735  | -0.5573535  | -1.00848085 | 1.00848085 |
| MTHFR     | PHF8         | -0.3458197  | 0.66263026  | 1.00844996  | 1.00844996 |
| TMEM163   | RMDN1        | 0.67805666  | -0.3302696  | -1.00832626 | 1.00832626 |
| EXD2      | FAM200B      | 0.38388127  | -0.6244269  | -1.00830817 | 1.00830817 |

|          |          |             |             |             |            |
|----------|----------|-------------|-------------|-------------|------------|
| RPRD1A   | CADM1    | -0.2997755  | 0.70847136  | 1.00824686  | 1.00824686 |
| TULP4    | ASB6     | -0.46187454 | 0.5463465   | 1.00822104  | 1.00822104 |
| CEPT1    | CSK      | -0.55428535 | 0.45389777  | 1.00818312  | 1.00818312 |
| ARPC5L   | CWF19L2  | -0.74136597 | 0.2667359   | 1.00810187  | 1.00810187 |
| COPB1    | TEC      | -0.38034344 | 0.62769663  | 1.00804007  | 1.00804007 |
| TAF1C    | RIC1     | -0.36899817 | 0.6390366   | 1.00803477  | 1.00803477 |
| PID1     | ARHGEF12 | -0.84892863 | 0.15905389  | 1.00798252  | 1.00798252 |
| ITCH     | BID      | -0.6429665  | 0.36498407  | 1.00795057  | 1.00795057 |
| SSRP1    | NAP1L1   | -0.51146024 | 0.49648282  | 1.00794306  | 1.00794306 |
| UBE2H    | CBX3     | 0.40497738  | -0.6029431  | -1.00792048 | 1.00792048 |
| SERPINA1 | CTNNA1   | -0.40989202 | 0.59800124  | 1.00789326  | 1.00789326 |
| ESRRG    | TMED8    | -0.50137216 | 0.50648504  | 1.0078572   | 1.0078572  |
| CCT3     | TM9SF3   | -0.40454987 | 0.6031287   | 1.00767857  | 1.00767857 |
| KDR      | LAMA1    | -0.41454324 | 0.5931262   | 1.00766944  | 1.00766944 |
| QKI      | MED31    | -0.43937474 | 0.5682688   | 1.00764354  | 1.00764354 |
| ZHX1     | BID      | -0.53336537 | 0.47427258  | 1.00763795  | 1.00763795 |
| COMMD3   | TAOK3    | -0.4208585  | 0.5867488   | 1.0076073   | 1.0076073  |
| SNTB2    | DNAH17   | -0.5922858  | 0.41531157  | 1.00759737  | 1.00759737 |
| ZDHHC14  | KCMF1    | 0.48284453  | -0.5246896  | -1.00753413 | 1.00753413 |
| SEH1L    | WDTC1    | -0.8567451  | 0.15078372  | 1.00752882  | 1.00752882 |
| FAM204A  | DCUN1D3  | 0.4952592   | -0.51222396 | -1.00748316 | 1.00748316 |
| H2AFY    | TRMT13   | -0.39642677 | 0.6109813   | 1.00740807  | 1.00740807 |
| RBMS3    | RPL27A   | -0.75034046 | 0.2569855   | 1.00732596  | 1.00732596 |
| APOE     | ALAD     | 0.70917946  | -0.29813874 | -1.0073182  | 1.0073182  |
| BID      | NOVA1    | -0.6905979  | 0.3166668   | 1.0072647   | 1.0072647  |
| TSPAN9   | CWF19L2  | -0.49933827 | 0.5079248   | 1.00726307  | 1.00726307 |
| CHD2     | MFAP3    | -0.70265603 | 0.30459595  | 1.00725198  | 1.00725198 |
| INIP     | FGFR10P2 | 0.37000334  | -0.63704133 | -1.00704467 | 1.00704467 |
| RNF150   | MYH6     | -0.73966897 | 0.26733038  | 1.00699935  | 1.00699935 |
| DPYSL3   | UNC5C    | 0.43559274  | -0.5712768  | -1.00686954 | 1.00686954 |
| SIX1     | CADM1    | -0.28597906 | 0.720879    | 1.00685806  | 1.00685806 |
| KIAA0141 | ZSCAN20  | -0.44035012 | 0.5664092   | 1.00675932  | 1.00675932 |
| RMI1     | RRAS     | -0.7891701  | 0.217509    | 1.0066791   | 1.0066791  |
| KIAA0513 | NXPH2    | -0.34679607 | 0.6598593   | 1.00665537  | 1.00665537 |
| AMMECR1  | ATP6V1E2 | -0.2558377  | 0.7507725   | 1.0066102   | 1.0066102  |
| FAM43A   | ARMC12   | -0.41666132 | 0.58994085  | 1.00660217  | 1.00660217 |
| KCNRG    | LONRF2   | -0.6177186  | 0.38886985  | 1.00658845  | 1.00658845 |
| ZWINT    | ZHX3     | -0.71350884 | 0.29305294  | 1.00656178  | 1.00656178 |
| EFCAB14  | FAM57A   | -0.54524565 | 0.46129116  | 1.00653681  | 1.00653681 |
| RGS5     | NELFCD   | -0.6403953  | 0.36605856  | 1.00645386  | 1.00645386 |
| KCNK15   | SFN      | 0.7852983   | -0.22104558 | -1.00634388 | 1.00634388 |
| MGAT5    | EIF4G3   | -0.4979053  | 0.508369    | 1.0062743   | 1.0062743  |
| PCOLCE2  | BMP1     | 0.4446724   | -0.561531   | -1.0062034  | 1.0062034  |
| GNAQ     | DNAJC9   | -0.62906575 | 0.37697747  | 1.00604322  | 1.00604322 |
| NKIRAS1  | SKA3     | -0.7141835  | 0.29184645  | 1.00602995  | 1.00602995 |
| ZDHHC14  | HIBADH   | 0.50618905  | -0.4997048  | -1.00589385 | 1.00589385 |
| GSTT1    | CIT      | -0.5345158  | 0.47136754  | 1.00588334  | 1.00588334 |
| CSNK2A1  | SPIRE1   | -0.44442415 | 0.5614517   | 1.00587585  | 1.00587585 |
| SORL1    | WWC1     | 0.552252    | -0.4535627  | -1.0058147  | 1.0058147  |
| LTBP4    | HDAC1    | -0.501744   | 0.5040171   | 1.0057611   | 1.0057611  |
| KLF12    | MFSD12   | 0.61167175  | -0.39408228 | -1.00575403 | 1.00575403 |
| UBC      | DIEXF    | -0.36890203 | 0.63682777  | 1.0057298   | 1.0057298  |
| B2M      | ASB9     | -0.5523001  | 0.4534073   | 1.0057074   | 1.0057074  |
| SRSF1    | RGS22    | -0.6002394  | 0.40536937  | 1.00560877  | 1.00560877 |
| MYOC     | ATP5SL   | -0.65629005 | 0.34931338  | 1.00560343  | 1.00560343 |

|         |              |             |             |             |            |
|---------|--------------|-------------|-------------|-------------|------------|
| UNC5C   | KPNA4        | -0.4359001  | 0.5696885   | 1.0055886   | 1.0055886  |
| PELP1   | MCM5         | 0.696459    | -0.30912778 | -1.00558678 | 1.00558678 |
| IDS     | TXNL1        | -0.25389835 | 0.7516758   | 1.00557415  | 1.00557415 |
| KLF12   | XPO5         | 0.2296844   | -0.7757916  | -1.005476   | 1.005476   |
| CADM1   | RHOQ         | -0.29809403 | 0.70735776  | 1.00545179  | 1.00545179 |
| SGCB    | PRICKLE1     | 0.5916426   | -0.41379273 | -1.00543533 | 1.00543533 |
| CLPB    | PDZD2        | -0.3321616  | 0.6732215   | 1.0053831   | 1.0053831  |
| PELI2   | MED31        | -0.4737594  | 0.53161705  | 1.00537645  | 1.00537645 |
| IL21    | TYW5         | -0.46344778 | 0.5418733   | 1.00532108  | 1.00532108 |
| TLN2    | GALNT2       | -0.5867796  | 0.41852158  | 1.00530118  | 1.00530118 |
| WTAP    | SPEF2        | 0.34073594  | -0.6644853  | -1.00522124 | 1.00522124 |
| NASP    | TRANK1       | -0.27986506 | 0.7252715   | 1.00513656  | 1.00513656 |
| EIF6    | NOP16        | 0.83045703  | -0.17461118 | -1.00506821 | 1.00506821 |
| XPO1    | RELA         | -0.7321249  | 0.27289397  | 1.00501887  | 1.00501887 |
| HSPH1   | KIRREL       | -0.66973156 | 0.33522448  | 1.00495604  | 1.00495604 |
| CADM1   | PRKRIR       | -0.4563288  | 0.54857373  | 1.00490253  | 1.00490253 |
| NMT2    | QSOX1        | 0.3857022   | -0.61898696 | -1.00468916 | 1.00468916 |
| LPCAT1  | ZNF467       | -0.53657573 | 0.46809462  | 1.00467035  | 1.00467035 |
| MAPK13  | APP          | -0.30505916 | 0.69958514  | 1.0046443   | 1.0046443  |
| CAB39L  | CASP5        | -0.76819736 | 0.236425    | 1.00462236  | 1.00462236 |
| QKI     | PPA1         | -0.44588286 | 0.5585816   | 1.00446446  | 1.00446446 |
| BUB1B   | BIK          | 0.8427829   | -0.16162047 | -1.00440337 | 1.00440337 |
| CSNK2A1 | CALM1        | -0.3026342  | 0.7016945   | 1.0043287   | 1.0043287  |
| MRPS12  | SPERT        | 0.33298618  | -0.67124724 | -1.00423342 | 1.00423342 |
| KATNAL1 | ADAMTS9      | -0.47115308 | 0.5330459   | 1.00419898  | 1.00419898 |
| GMPS    | CWF19L2      | -0.82000023 | 0.18414102  | 1.00414125  | 1.00414125 |
| THRB    | SNRPC        | -0.6543087  | 0.34979656  | 1.00410526  | 1.00410526 |
| TYRO3   | TNIP1        | -0.2267862  | 0.77730703  | 1.00409323  | 1.00409323 |
| NOL9    | CHD2         | -0.43881056 | 0.565223    | 1.00403356  | 1.00403356 |
| BTC     | OLFML2B      | 0.5394886   | -0.4644721  | -1.0039607  | 1.0039607  |
| PSMB2   | NOP16        | 0.9449945   | -0.05887985 | -1.00387435 | 1.00387435 |
| FAM107B | LOC102724562 | 0.40801626  | -0.5958223  | -1.00383856 | 1.00383856 |
| ADAM10  | ABI2         | 0.55411416  | -0.44971368 | -1.00382784 | 1.00382784 |
| GALNT2  | HIST1H2BE    | 0.66363394  | -0.34017998 | -1.00381392 | 1.00381392 |
| GALNT2  | EHBP1        | -0.6425963  | 0.361155    | 1.0037513   | 1.0037513  |
| DPAGT1  | ZNF546       | -0.3790972  | 0.62461877  | 1.00371597  | 1.00371597 |
| NXF1    | MAPK13       | -0.30400467 | 0.69970286  | 1.00370753  | 1.00370753 |
| SGCB    | NAB2         | 0.5535122   | -0.45001146 | -1.00352366 | 1.00352366 |
| DNAJB1  | POU2F2       | -0.77632385 | 0.22719909  | 1.00352294  | 1.00352294 |
| OPRK1   | C5AR1        | -0.47325298 | 0.53015894  | 1.00341192  | 1.00341192 |
| FAM136A | ESRP2        | 0.62986195  | -0.3735094  | -1.00337135 | 1.00337135 |
| IL2     | ZNF385D      | 0.65541464  | -0.3478667  | -1.00328134 | 1.00328134 |
| MED15   | PPIL2        | -0.3942871  | 0.6088987   | 1.0031858   | 1.0031858  |
| MITF    | SIRPA        | 0.514674    | -0.4884952  | -1.0031692  | 1.0031692  |
| STXBP6  | CPXM1        | 0.48550695  | -0.51752    | -1.00302695 | 1.00302695 |
| MAP4K4  | CFAP58       | 0.5051219   | -0.4978924  | -1.0030143  | 1.0030143  |
| TRPM3   | PINK1        | -0.6972014  | 0.30581206  | 1.00301346  | 1.00301346 |
| ZDHHC14 | ITIH5        | 0.2998306   | -0.70308095 | -1.00291155 | 1.00291155 |
| SSB     | STXBP6       | -0.70656884 | 0.29627374  | 1.00284258  | 1.00284258 |
| UBC     | DNAJC9       | -0.43428937 | 0.568463    | 1.00275237  | 1.00275237 |
| UROS    | SLIRP        | 0.6573464   | -0.34536618 | -1.00271258 | 1.00271258 |
| TOP2A   | MFAP3        | 0.26016608  | -0.74246377 | -1.00262985 | 1.00262985 |
| SAA4    | SDPR         | -0.35062215 | 0.65193844  | 1.00256059  | 1.00256059 |
| PPA1    | PCDH9        | -0.3388889  | 0.66367066  | 1.00255956  | 1.00255956 |
| GTF3C1  | IL18BP       | -0.2982767  | 0.70426214  | 1.00253884  | 1.00253884 |



|          |          |             |             |              |             |
|----------|----------|-------------|-------------|--------------|-------------|
| CADM1    | KLHL17   | 0.3258665   | -0.67667055 | -1.00253705  | 1.00253705  |
| KDR      | C1QTNF6  | -0.40240288 | 0.60012156  | 1.00252444   | 1.00252444  |
| GNAQ     | SOX4     | 0.4536742   | -0.5487453  | -1.0024195   | 1.0024195   |
| NAB2     | SKA3     | -0.7885728  | 0.21379156  | 1.00236436   | 1.00236436  |
| WBP4     | ARHGEF12 | -0.8427173  | 0.15959619  | 1.00231349   | 1.00231349  |
| WDR46    | CHD2     | -0.4220999  | 0.58014524  | 1.00224514   | 1.00224514  |
| EFEMP2   | THBS3    | 0.9021697   | -0.10006675 | -1.00223645  | 1.00223645  |
| VAV2     | MOCOS    | 0.44394985  | -0.5582598  | -1.00220965  | 1.00220965  |
| PTPN21   | QSOX1    | 0.6074309   | -0.39475298 | -1.00218388  | 1.00218388  |
| SERP1    | HAMP     | 0.65540236  | -0.34672472 | -1.00212708  | 1.00212708  |
| HDAC11   | SNRBP2   | -0.51637167 | 0.48575175  | 1.00212342   | 1.00212342  |
| KLF12    | KIAA1715 | 0.4699251   | -0.5320963  | -1.0020214   | 1.0020214   |
| PALLD    | LTBP4    | 0.3567859   | -0.6452331  | -1.002019    | 1.002019    |
| PRPH     | BCAT2    | -0.20384574 | 0.798098    | 1.00194374   | 1.00194374  |
| LYRM1    | C1QBP    | -0.54577774 | 0.45612642  | 1.00190416   | 1.00190416  |
| BRF1     | ANXA11   | 0.36556292  | -0.6363202  | -1.00188312  | 1.00188312  |
| PALMD    | SAMD4A   | -0.66530675 | 0.33652568  | 1.00183243   | 1.00183243  |
| DLG1     | CADM1    | -0.4899295  | 0.51186776  | 1.00179726   | 1.00179726  |
| DNAJC15  | KIF13A   | 0.815106    | -0.18657461 | -1.00168061  | 1.00168061  |
| TACC1    | GALNT2   | -0.39487213 | 0.6067073   | 1.00157943   | 1.00157943  |
| FBN1     | THBS3    | 0.67843425  | -0.3230952  | -1.00152945  | 1.00152945  |
| NAB2     | AIDA     | 0.6567966   | -0.34470737 | -1.00150397  | 1.00150397  |
| NTRK2    | SLC24A4  | 0.4623444   | -0.53914595 | -1.00149035  | 1.00149035  |
| ORC5     | ABI2     | 0.6011006   | -0.40033844 | -1.00143904  | 1.00143904  |
| KPNA4    | RNF150   | -0.14041068 | 0.86098087  | 1.00139155   | 1.00139155  |
| MFAP3    | GSTM4    | -0.20168181 | 0.79970014  | 1.00138195   | 1.00138195  |
| RAB11A   | LHPP     | 0.48424459  | -0.5171241  | -1.00136869  | 1.00136869  |
| DCUN1D5  | PCED1B   | -0.5107049  | 0.49064955  | 1.00135445   | 1.00135445  |
| BUB1B    | FOXO1    | 0.95445454  | -0.04679063 | -1.001245166 | 1.001245166 |
| COPZ1    | PDZRN3   | -0.5937849  | 0.40744135  | 1.00122625   | 1.00122625  |
| DCAF8    | DTL      | -0.75220406 | 0.24901359  | 1.00121765   | 1.00121765  |
| SLC25A13 | CAPS2    | -0.24522358 | 0.75598305  | 1.00120663   | 1.00120663  |
| KIAA0101 | RIMS2    | 0.5761811   | -0.42500842 | -1.00118952  | 1.00118952  |
| NAP1L1   | CYP46A1  | 0.6960566   | -0.30506384 | -1.00112044  | 1.00112044  |
| ZFAND5   | GPR155   | -0.4250454  | 0.57603616  | 1.00108156   | 1.00108156  |
| SAP18    | NEGR1    | -0.40275404 | 0.59820163  | 1.00095567   | 1.00095567  |
| PTTG1    | CDC37L1  | -0.77453375 | 0.22637203  | 1.00090578   | 1.00090578  |
| LPGAT1   | TRIM21   | 0.33849138  | -0.6623357  | -1.00082708  | 1.00082708  |
| TCAIM    | DNAH10   | 0.37313133  | -0.62767416 | -1.00080549  | 1.00080549  |
| SERBP1   | INIP     | 0.5518931   | -0.44884282 | -1.00073592  | 1.00073592  |
| NFIA     | CBLN2    | 0.38815138  | -0.6125572  | -1.00070858  | 1.00070858  |
| GRM5     | CHD1L    | 0.29991952  | -0.7007433  | -1.00066282  | 1.00066282  |
| SRSF1    | LNK1     | -0.84343237 | 0.15722166  | 1.00065403   | 1.00065403  |
| PCNA     | USP9X    | -0.36636275 | 0.6342602   | 1.00062295   | 1.00062295  |
| LTF      | SLPI     | 0.43467492  | -0.565942   | -1.00061692  | 1.00061692  |
| SOBP     | LIME1    | -0.5359923  | 0.46459347  | 1.00058577   | 1.00058577  |
| GAPDH    | NFE2L1   | -0.85725415 | 0.14315648  | 1.00041063   | 1.00041063  |
| YARS     | AUP1     | -0.22810902 | 0.7722622   | 1.00037122   | 1.00037122  |
| XRCC5    | NGFR     | 0.88656735  | -0.11379779 | -1.00036514  | 1.00036514  |
| SERPINA1 | EPHX2    | -0.70197135 | 0.29831648  | 1.00028783   | 1.00028783  |
| PPA1     | LYSMD2   | 0.742158    | -0.25811982 | -1.00027782  | 1.00027782  |
| NOL10    | TEX264   | -0.37767497 | 0.622566    | 1.00024097   | 1.00024097  |
| BACE2    | PRUNE2   | -0.541043   | 0.45919323  | 1.00023623   | 1.00023623  |
| TCEB3    | URI1     | 0.6499754   | -0.35017595 | -1.00015135  | 1.00015135  |
| CALD1    | HLA-G    | 0.637929    | -0.36221766 | -1.00014666  | 1.00014666  |

|        |        |             |             |             |            |
|--------|--------|-------------|-------------|-------------|------------|
| MED17  | TSPAN9 | 0.35238475  | -0.6477422  | -1.00012695 | 1.00012695 |
| PGF    | C8orf4 | 0.67974925  | -0.32031363 | -1.00006288 | 1.00006288 |
| PPM1A  | BMP1   | 0.41559735  | -0.584458   | -1.00005535 | 1.00005535 |
| DLGAP1 | FLNB   | -0.36030015 | 0.6397461   | 1.00004625  | 1.00004625 |
| ESRRG  | COPS7B | 0.6647972   | -0.33521503 | -1.00001223 | 1.00001223 |
