# Supplementary material for: Identification of key regulatory genes connected to NF-κB family of proteins in visceral adipose tissues using gene expression and weighted protein interaction network
Source: PubMed Central journal article supplement (PMC6478283; doi:10.1371/journal.pone.0214337), 2019-04-23
Supplement: pone.0214337.s006.pdf [file pone.0214337.s006.pdf]

S6 Table: Sgo annotations based on DPcc in normal vs Obese

| Gene-1   | Gene-2   | Normal      | Obese       | $D_{PCC}$ (ABS) | $S_{GO}$ |
|----------|----------|-------------|-------------|-----------------|----------|
| MCM3     | TOP2A    | 0.7113794   | -0.7908391  | 1.5022185       | 1        |
| XRCC5    | RBM17    | -0.6855559  | 0.765678    | 1.4512339       | 1        |
| TEX10    | PELP1    | 0.7758664   | -0.6404441  | 1.4163105       | 1        |
| NEDD4L   | PRICKLE1 | 0.7761754   | -0.6375003  | 1.4136757       | 1        |
| MCM3     | HLA-C    | -0.60021347 | 0.81271887  | 1.41293234      | 1        |
| COL4A1   | FZR1     | 0.7556257   | -0.6345547  | 1.3901804       | 1        |
| TOP2A    | BIK      | 0.8647102   | -0.52093965 | 1.38564985      | 1        |
| ESRRG    | RPRD1A   | -0.6117029  | 0.7674302   | 1.3791331       | 1        |
| RAB35    | COG6     | 0.640026    | -0.7240482  | 1.3640742       | 1        |
| HDAC1    | RBM17    | -0.6978421  | 0.6587166   | 1.3565587       | 1        |
| MCM3     | ZBTB10   | -0.60310096 | 0.7494847   | 1.35258566      | 1        |
| LMO3     | SOX4     | 0.6061915   | -0.7387266  | 1.3449181       | 1        |
| MCM3     | RBM17    | -0.6941539  | 0.64797425  | 1.34212815      | 1        |
| NEGR1    | MSRB3    | -0.8506514  | 0.4910484   | 1.3416998       | 1        |
| CSTF3    | NEGR1    | 0.63993984  | -0.6943373  | 1.33427714      | 1        |
| QKI      | C1orf131 | -0.58601725 | 0.74562836  | 1.33164561      | 1        |
| PCNA     | ZBTB10   | -0.6408693  | 0.67680013  | 1.31766943      | 1        |
| GALNT2   | ADGRA2   | -0.5844702  | 0.7323404   | 1.3168106       | 1        |
| SNRPB2   | RBM17    | -0.53370345 | 0.76769567  | 1.30139912      | 1        |
| ANKRD28  | LCLAT1   | -0.5706625  | 0.71929157  | 1.28995407      | 1        |
| MCM3     | THRB     | -0.71150345 | 0.5740923   | 1.28559575      | 1        |
| TRIAP1   | SH3RF1   | -0.48181644 | 0.80352235  | 1.28533879      | 1        |
| ZBTB10   | HDAC1    | -0.6360605  | 0.64366376  | 1.27972426      | 1        |
| RBM17    | SLIRP    | -0.5577912  | 0.7207314   | 1.2785226       | 1        |
| MOB3B    | SNRPC    | -0.49947715 | 0.7718912   | 1.27136835      | 1        |
| SH3D19   | PRICKLE1 | 0.588061    | -0.68275344 | 1.27081444      | 1        |
| PCDH17   | TOP3A    | -0.60044414 | 0.668883    | 1.26932714      | 1        |
| KPNB1    | DCAF7    | -0.4774065  | 0.7871937   | 1.2646002       | 1        |
| ITGB6    | MYOF     | 0.6040414   | -0.658583   | 1.2626244       | 1        |
| RAE1     | DCAF8    | -0.418044   | 0.8405329   | 1.2585769       | 1        |
| RAB27A   | LAGE3    | 0.5993815   | -0.65711904 | 1.25650054      | 1        |
| RAB11A   | RAB40B   | -0.6919919  | 0.56070274  | 1.25269464      | 1        |
| TCEB3    | TCF3     | 0.5512225   | -0.69814813 | 1.24937063      | 1        |
| NGFR     | TIMM23   | 0.6069994   | -0.63517964 | 1.24217904      | 1        |
| CSNK2A1  | CD48     | 0.6353478   | -0.6065509  | 1.2418987       | 1        |
| TBL1X    | DCAF8    | -0.5542635  | 0.6867638   | 1.2410273       | 1        |
| CYR61    | WISP1    | 0.6109724   | -0.6254056  | 1.236378        | 1        |
| CCT3     | DCAF7    | -0.5380505  | 0.69643104  | 1.23448154      | 1        |
| RBM17    | CSNK2A1  | -0.44787282 | 0.7865706   | 1.23444342      | 1        |
| NEGR1    | PHF8     | 0.6168795   | -0.6148601  | 1.2317396       | 1        |
| FANCI    | FANCB    | 0.6176202   | -0.6111999  | 1.2288201       | 1        |
| ITGB6    | TNC      | 0.66467714  | -0.5583196  | 1.22299674      | 1        |
| MED15    | RACGAP1  | -0.6363869  | 0.5859455   | 1.2223324       | 1        |
| PRICKLE1 | CD164    | 0.7149994   | -0.50563186 | 1.22063126      | 1        |
| RUFY3    | ZWILCH   | -0.7970466  | 0.42337856  | 1.22042516      | 1        |
| FAM96A   | RBM17    | -0.7590593  | 0.45921287  | 1.21827217      | 1        |
| ANKRD28  | ZWILCH   | -0.6711186  | 0.54566497  | 1.21678357      | 1        |
| MCM3     | PTTG1    | 0.8143693   | -0.400565   | 1.2149343       | 1        |
| UBC      | MCM3     | -0.5083812  | 0.7026548   | 1.211036        | 1        |
| DKC1     | RBM17    | -0.56339586 | 0.6475767   | 1.21097256      | 1        |
| SLC7A1   | INIP     | 0.54728913  | -0.6533572  | 1.20064633      | 1        |
| RMI1     | SESN1    | -0.43570518 | 0.76488334  | 1.20058852      | 1        |
| CSF3R    | BMP1     | -0.58471745 | 0.61303264  | 1.19775009      | 1        |

|          |          |             |             |            |   |
|----------|----------|-------------|-------------|------------|---|
| SNCG     | MCM3     | 0.4127377   | -0.78263354 | 1.19537124 | 1 |
| MCM3     | SPAG5    | 0.73816586  | -0.4560622  | 1.19422806 | 1 |
| ADGRA2   | MMAB     | -0.39438456 | 0.7996576   | 1.19404216 | 1 |
| XRCC5    | MOB3B    | -0.54961085 | 0.6441632   | 1.19377405 | 1 |
| MCM4     | MCM3     | 0.86193496  | -0.33182037 | 1.19375533 | 1 |
| HSP90AA1 | C1QTNF6  | 0.51867145  | -0.6738759  | 1.19254735 | 1 |
| PALLD    | NEGR1    | -0.5843992  | 0.6051836   | 1.1895828  | 1 |
| GAPDH    | RBM17    | -0.79458725 | 0.3927499   | 1.18733715 | 1 |
| TEC      | PTPN21   | 0.62572354  | -0.5575818  | 1.18330534 | 1 |
| TRIAP1   | PCED1B   | -0.65734273 | 0.5259372   | 1.18327993 | 1 |
| AGTRAP   | ENTHD2   | -0.3687012  | 0.81358516  | 1.18228636 | 1 |
| TRIO     | ARHGEF37 | -0.75964236 | 0.42085308  | 1.18049544 | 1 |
| MAPK10   | PRICKLE1 | 0.78494626  | -0.39296487 | 1.17791113 | 1 |
| TRAF3IP1 | GALNT2   | -0.56073445 | 0.61346555  | 1.1742     | 1 |
| XPO1     | AMMECR1  | 0.42881215  | -0.74465036 | 1.17346251 | 1 |
| DCAF8    | SF3B3    | -0.72542244 | 0.44709456  | 1.172517   | 1 |
| MCM3     | CHD2     | -0.6058033  | 0.5646926   | 1.1704959  | 1 |
| ADA      | ENTHD2   | -0.65718454 | 0.51197     | 1.16915454 | 1 |
| FANCA    | CDK1     | 0.7449918   | -0.42201433 | 1.16700613 | 1 |
| EFCAB14  | GET4     | -0.37335375 | 0.79350424  | 1.16685799 | 1 |
| USP4     | ZNF276   | -0.7989136  | 0.3675607   | 1.1664743  | 1 |
| ACVR2A   | WDR27    | 0.73194844  | -0.43315393 | 1.16510237 | 1 |
| CAB39L   | YME1L1   | 0.5409567   | -0.623102   | 1.1640587  | 1 |
| MCM5     | MCM4     | 0.73123837  | -0.43095213 | 1.1621905  | 1 |
| FAM96A   | TSPAN9   | 0.5425861   | -0.6191251  | 1.1617112  | 1 |
| GEMIN4   | ZNF202   | -0.4898532  | 0.6701468   | 1.16       | 1 |
| MCM3     | OPTN     | -0.511448   | 0.648262    | 1.15971    | 1 |
| ARNTL    | C12orf49 | -0.43920115 | 0.7172291   | 1.15643025 | 1 |
| MPPED2   | TIMELESS | -0.4121234  | 0.74092376  | 1.15304716 | 1 |
| APOE     | RMI1     | -0.66333586 | 0.4862168   | 1.14955266 | 1 |
| SRSF1    | RBM17    | -0.55379677 | 0.59519684  | 1.14899361 | 1 |
| NEGR1    | HELLS    | 0.58985794  | -0.55873114 | 1.14858908 | 1 |
| MCM3     | HLA-B    | -0.35771003 | 0.78977287  | 1.1474829  | 1 |
| ITGB5    | PDLIM4   | 0.46718037  | -0.6751796  | 1.14235997 | 1 |
| PARK2    | PTPN4    | -0.5985422  | 0.54295677  | 1.14149897 | 1 |
| SNRPB2   | SNTB1    | -0.6307162  | 0.508367    | 1.1390832  | 1 |
| CTNNA1   | TRO      | -0.65859157 | 0.47834104  | 1.13693261 | 1 |
| PDE9A    | LAGE3    | -0.7517738  | 0.38443324  | 1.13620704 | 1 |
| ZBTB10   | PNPT1    | -0.48682344 | 0.6491506   | 1.13597404 | 1 |
| RUFY3    | RMI1     | -0.80906034 | 0.3246371   | 1.13369744 | 1 |
| COMTD1   | METTL3   | -0.7782576  | 0.3549531   | 1.1332107  | 1 |
| CCT6A    | INIP     | 0.6225192   | -0.5089921  | 1.1315113  | 1 |
| CSRNP1   | ADAMTSL3 | -0.53188175 | 0.5983693   | 1.13025105 | 1 |
| SH3RF1   | PRICKLE1 | 0.7206998   | -0.4083675  | 1.1290673  | 1 |
| COMMD3   | ALS2     | -0.65942615 | 0.46762642  | 1.12705257 | 1 |
| CDK6     | NEGR1    | -0.53276855 | 0.5922269   | 1.12499545 | 1 |
| MCM6     | ADGRA2   | -0.6794518  | 0.44438645  | 1.12383825 | 1 |
| NUB1     | PER3     | -0.568129   | 0.55496514  | 1.12309414 | 1 |
| GSTP1    | RMI1     | -0.46952736 | 0.65353674  | 1.1230641  | 1 |
| XPO1     | ZWILCH   | -0.3493971  | 0.7736436   | 1.1230407  | 1 |
| TRIM25   | DCAF8    | -0.2875623  | 0.83428013  | 1.12184243 | 1 |
| MAP4K4   | MYL12A   | 0.23769654  | -0.88372785 | 1.12142439 | 1 |
| LARP6    | TRO      | 0.40539902  | -0.7143764  | 1.11977542 | 1 |
| XRCC5    | CD48     | 0.71854156  | -0.39971268 | 1.11825424 | 1 |
| KATNAL1  | NELFCD   | -0.5515645  | 0.56514525  | 1.11670975 | 1 |
| NEGR1    | NDFIP2   | 0.85021955  | -0.26427695 | 1.1144965  | 1 |

|          |              |             |             |            |   |
|----------|--------------|-------------|-------------|------------|---|
| KANK1    | PRICKLE1     | 0.52613926  | -0.5873488  | 1.11348806 | 1 |
| IP6K2    | NEGR1        | 0.5524746   | -0.559207   | 1.1116816  | 1 |
| NEGR1    | PNPT1        | 0.58121806  | -0.5300154  | 1.11123346 | 1 |
| ESRRG    | PID1         | -0.69109595 | 0.41924796  | 1.11034391 | 1 |
| IGF2R    | LAGE3        | -0.62079984 | 0.48883292  | 1.10963276 | 1 |
| VPS33B   | MLST8        | -0.4795739  | 0.62919044  | 1.10876434 | 1 |
| EIF4G3   | PTPN21       | 0.5074395   | -0.5996893  | 1.1071288  | 1 |
| MCM3     | CD48         | 0.6075954   | -0.49880737 | 1.10640277 | 1 |
| COG6     | ANTXR2       | -0.4602705  | 0.6427911   | 1.1030616  | 1 |
| RBM17    | GSTM5        | 0.8908159   | -0.2110684  | 1.1018843  | 1 |
| RBM17    | DAZAP1       | -0.5438388  | 0.55200905  | 1.09584785 | 1 |
| UBC      | ASB6         | -0.5738544  | 0.5210189   | 1.0948733  | 1 |
| COMMD3   | VAPB         | -0.39712018 | 0.6956961   | 1.09281628 | 1 |
| RSU1     | ISYNA1       | 0.3043943   | -0.78771    | 1.0921043  | 1 |
| APC      | COMMD3       | -0.47250283 | 0.61860675  | 1.09110958 | 1 |
| IFNAR2   | HELLS        | -0.4181368  | 0.67231685  | 1.09045365 | 1 |
| TCEB3    | LCA5         | -0.33578095 | 0.7536885   | 1.08946945 | 1 |
| TBL1XR1  | DCAF11       | 0.729263    | -0.3602027  | 1.0894657  | 1 |
| SLC7A1   | CCDC117      | 0.5806442   | -0.5078374  | 1.0884816  | 1 |
| RBPJ     | CCM2         | -0.5958817  | 0.49147847  | 1.08736017 | 1 |
| TOP2A    | MCM5         | 0.7187027   | -0.36840472 | 1.08710742 | 1 |
| GTF3C1   | ARPIN        | 0.49155882  | -0.5941319  | 1.08569072 | 1 |
| MAD2L1BP | CBLB         | -0.47125065 | 0.6129404   | 1.08419105 | 1 |
| ZBTB10   | NOL9         | -0.5248361  | 0.5585209   | 1.083357   | 1 |
| RUFY3    | VANGL1       | -0.38680127 | 0.6961557   | 1.08295697 | 1 |
| AGPAT5   | LOC100996693 | 0.36950636  | -0.71333957 | 1.08284593 | 1 |
| BIK      | BCL2         | -0.7581294  | 0.32391524  | 1.08204464 | 1 |
| TACC1    | KIAA0391     | -0.6769218  | 0.4049558   | 1.0818776  | 1 |
| PCBP2    | LNX1         | 0.30501166  | -0.7758244  | 1.08083606 | 1 |
| MPPED2   | GSTM3        | 0.46799046  | -0.61190784 | 1.0798983  | 1 |
| NFKBIE   | MIB2         | 0.6234857   | -0.4561796  | 1.0796653  | 1 |
| CEACAM1  | CD164        | -0.41444218 | 0.66521865  | 1.07966083 | 1 |
| ARPP21   | ETV3         | -0.78889364 | 0.28922898  | 1.07812262 | 1 |
| C12orf49 | EGR1         | 0.46467733  | -0.6133107  | 1.07798803 | 1 |
| GSS      | PARPBP       | 0.66556865  | -0.41179305 | 1.0773617  | 1 |
| SERBP1   | ZBTB10       | -0.6078574  | 0.4693091   | 1.0771665  | 1 |
| HTT      | FAM111A      | -0.56689245 | 0.51018673  | 1.07707918 | 1 |
| TCEB3    | SNX1         | -0.43235403 | 0.6431276   | 1.07548163 | 1 |
| ZWINT    | FANCB        | 0.72250295  | -0.35273087 | 1.07523382 | 1 |
| PPIL2    | NEGR1        | 0.18870448  | -0.8856535  | 1.07435798 | 1 |
| SORBS1   | PRICKLE1     | 0.39259452  | -0.68136865 | 1.07396317 | 1 |
| ZWINT    | DCAF7        | -0.59859043 | 0.4750465   | 1.07363693 | 1 |
| POSTN    | HELLS        | -0.23205052 | 0.84146     | 1.07351052 | 1 |
| GSS      | DCAF8        | -0.23436886 | 0.83849144  | 1.0728603  | 1 |
| IFNAR2   | DFNB31       | -0.5066317  | 0.5661708   | 1.0728025  | 1 |
| AGPAT5   | CCDC117      | 0.3875129   | -0.6846923  | 1.0722052  | 1 |
| NEGR1    | AGTRAP       | 0.33158484  | -0.7400453  | 1.07163014 | 1 |
| DCAF8    | HPS6         | -0.5539695  | 0.5162357   | 1.0702052  | 1 |
| COG6     | CLASRP       | 0.58974123  | -0.4802644  | 1.07000563 | 1 |
| CWF19L2  | SDPR         | 0.5655303   | -0.5035309  | 1.0690612  | 1 |
| PSMB3    | NAALADL2     | -0.66128206 | 0.40726128  | 1.06854334 | 1 |
| RBM45    | MTHFSD       | 0.39024082  | -0.6750295  | 1.06527032 | 1 |
| RUFY3    | MPHOSPH6     | -0.71511245 | 0.34836802  | 1.06348047 | 1 |
| LMO3     | COL1A1       | 0.16715042  | -0.8956476  | 1.06279802 | 1 |
| BCS1L    | SPERT        | 0.5736686   | -0.48694137 | 1.06060997 | 1 |
| ZWINT    | GDAP2        | -0.4487793  | 0.61167043  | 1.06044973 | 1 |

|          |          |             |             |            |   |
|----------|----------|-------------|-------------|------------|---|
| DTL      | DCAF7    | -0.4971641  | 0.56317335  | 1.06033745 | 1 |
| SUFU     | CA8      | 0.3113392   | -0.7487991  | 1.0601383  | 1 |
| LTA      | MPHOSPH6 | 0.50067705  | -0.5594571  | 1.06013415 | 1 |
| COL5A1   | AGTRAP   | -0.31809118 | 0.741767    | 1.05985818 | 1 |
| TYRO3    | PRICKLE1 | 0.34964362  | -0.7101503  | 1.05979392 | 1 |
| DYSF     | ENTHD2   | -0.5185474  | 0.54112077  | 1.05966817 | 1 |
| PCNA     | CCDC90B  | -0.28364736 | 0.7757734   | 1.05942076 | 1 |
| TOR1AIP1 | CWF19L2  | 0.46786803  | -0.5910845  | 1.05895253 | 1 |
| CSF3R    | POLN     | 0.77685916  | -0.28087813 | 1.05773729 | 1 |
| SH3RF1   | TBRG4    | -0.42614567 | 0.6262359   | 1.05238157 | 1 |
| BCL2     | PRICKLE1 | 0.2665354   | -0.78372824 | 1.05026364 | 1 |
| CCT3     | ADGRA2   | -0.538114   | 0.5119274   | 1.0500414  | 1 |
| MCM6     | PCED1B   | -0.6652462  | 0.38476378  | 1.05000998 | 1 |
| TBC1D9B  | PRICKLE1 | 0.47176006  | -0.5776979  | 1.04945796 | 1 |
| WARS     | CD48     | 0.49212626  | -0.5558259  | 1.04795216 | 1 |
| CEACAM1  | CCDC90B  | -0.72654366 | 0.32124338  | 1.04778704 | 1 |
| KCND2    | TIMM23   | -0.4389272  | 0.60861665  | 1.04754385 | 1 |
| KARS     | NAALADL2 | -0.4804996  | 0.5668296   | 1.0473292  | 1 |
| FOXJ2    | TMEM159  | -0.39228848 | 0.6550155   | 1.04730398 | 1 |
| GFOD1    | STAT3    | 0.39264286  | -0.65258837 | 1.04523123 | 1 |
| KIRREL   | AAGAB    | -0.47012866 | 0.5748902   | 1.04501886 | 1 |
| ARPP21   | KLHL5    | -0.7031152  | 0.3417744   | 1.0448896  | 1 |
| GNA12    | CCDC117  | 0.53229994  | -0.51215833 | 1.04445827 | 1 |
| UBC      | NFATC2IP | -0.7758697  | 0.26826587  | 1.04413557 | 1 |
| RBM17    | SOX4     | 0.5145349   | -0.5285694  | 1.0431043  | 1 |
| NAALADL2 | SNRPC    | -0.70690274 | 0.3349186   | 1.04182134 | 1 |
| GYS1     | MCM3     | -0.5137019  | 0.5278243   | 1.0415262  | 1 |
| POC1A    | WRAP53   | 0.5938008   | -0.44731456 | 1.04111536 | 1 |
| ZFP36L1  | WDR27    | -0.31012595 | 0.7307512   | 1.04087715 | 1 |
| UBC      | ZWILCH   | -0.45063546 | 0.5895613   | 1.04019676 | 1 |
| NXF1     | AMMECR1  | 0.39274746  | -0.6473658  | 1.04011326 | 1 |
| MAP4     | PRICKLE1 | 0.4514179   | -0.5884929  | 1.0399108  | 1 |
| ATG2A    | EGR1     | 0.49253404  | -0.5471933  | 1.03972734 | 1 |
| TEX264   | C8orf33  | -0.3618476  | 0.6774701   | 1.0393177  | 1 |
| NEGR1    | RNF207   | 0.3447052   | -0.69423765 | 1.03894285 | 1 |
| GEM      | ADGRA2   | 0.84813964  | -0.19013816 | 1.0382778  | 1 |
| CIAO1    | DCAF8    | -0.49166837 | 0.54513663  | 1.036805   | 1 |
| CCT3     | NAALADL2 | -0.5647555  | 0.47177148  | 1.03652698 | 1 |
| CCDC90B  | TBC1D1   | -0.42032644 | 0.6154796   | 1.03580604 | 1 |
| TSPAN9   | CNOT11   | 0.60545003  | -0.42890885 | 1.03435888 | 1 |
| ANKRD28  | TEAD4    | -0.51011187 | 0.52319604  | 1.03330791 | 1 |
| MCM3     | CBX3     | -0.28231075 | 0.7509167   | 1.03322745 | 1 |
| APC      | C19orf25 | -0.35791075 | 0.6749284   | 1.03283915 | 1 |
| TCF3     | SEH1L    | 0.6875104   | -0.34528542 | 1.03279582 | 1 |
| LMO3     | KCNQ4    | -0.3001947  | 0.7321482   | 1.0323429  | 1 |
| ABI2     | SREK1IP1 | 0.5666971   | -0.46564087 | 1.03233797 | 1 |
| UBC      | C1orf131 | -0.31514254 | 0.7171173   | 1.03225984 | 1 |
| NFASC    | MAGOHB   | -0.653534   | 0.37844336  | 1.03197736 | 1 |
| EPS15    | MPHOSPH6 | -0.72660255 | 0.30341598  | 1.03001853 | 1 |
| DAZAP1   | MTHFSD   | 0.2493642   | -0.78062314 | 1.02998734 | 1 |
| COPB1    | AP3M1    | -0.6126713  | 0.41671422  | 1.02938552 | 1 |
| ALDOB    | HELLS    | 0.48257044  | -0.5467494  | 1.02931984 | 1 |
| DNAJB1   | ATG2A    | 0.6785055   | -0.35001776 | 1.02852326 | 1 |
| COL5A1   | C1QTNF6  | -0.38592166 | 0.6423114   | 1.02823306 | 1 |
| ITGB6    | PDHB     | -0.6707922  | 0.3568106   | 1.0276028  | 1 |
| SRGAP1   | TEX264   | -0.44430655 | 0.58288395  | 1.0271905  | 1 |

|         |              |             |             |            |   |
|---------|--------------|-------------|-------------|------------|---|
| EFCAB14 | PHF8         | -0.29353324 | 0.73354805  | 1.02708129 | 1 |
| NEGR1   | METTL17      | 0.3706643   | -0.65464675 | 1.02531105 | 1 |
| NAB2    | RTN3         | 0.31388634  | -0.709467   | 1.02335334 | 1 |
| AP1G2   | AAGAB        | -0.4089178  | 0.614151    | 1.0230688  | 1 |
| SRSF1   | MTHFSD       | 0.23373093  | -0.7883633  | 1.02209423 | 1 |
| GDAP2   | ZDHHC16      | -0.3783108  | 0.64303756  | 1.02134836 | 1 |
| SLC22A4 | GFOD1        | 0.60649365  | -0.4147337  | 1.02122735 | 1 |
| ORC5    | CCDC57       | -0.52925044 | 0.49158594  | 1.02083638 | 1 |
| RAB21   | RAB30        | 0.8183601   | -0.20050614 | 1.01886624 | 1 |
| STAC    | POLDIP3      | 0.32839075  | -0.6903522  | 1.01874295 | 1 |
| RBM17   | OLA1         | -0.48164925 | 0.5366872   | 1.01833645 | 1 |
| STAT1   | MCM5         | -0.47085145 | 0.54647344  | 1.01732489 | 1 |
| ATG2A   | JUND         | 0.6876541   | -0.32965648 | 1.01731058 | 1 |
| GAPDH   | BIK          | 0.6658838   | -0.3511205  | 1.0170043  | 1 |
| RAB5A   | ZNF101       | 0.49935406  | -0.5172664  | 1.01662046 | 1 |
| BUB1B   | SEH1L        | 0.69831747  | -0.31802306 | 1.01634053 | 1 |
| CTNNA1  | NEGR1        | 0.26825455  | -0.7480327  | 1.01628725 | 1 |
| EIF5    | NAALADL2     | -0.43546405 | 0.5802863   | 1.01575035 | 1 |
| RSU1    | RBM45        | -0.50191414 | 0.51271206  | 1.0146262  | 1 |
| SYNPO2  | WDR27        | 0.71380424  | -0.29962647 | 1.01343071 | 1 |
| EZH2    | ZBTB10       | -0.61711895 | 0.3960668   | 1.01318575 | 1 |
| WARS    | LCA5         | -0.52122456 | 0.4918225   | 1.01304706 | 1 |
| ANKRD28 | NUP62        | -0.5595331  | 0.45136604  | 1.01089914 | 1 |
| VCAM1   | ZNF397       | 0.270888    | -0.7398598  | 1.0107478  | 1 |
| ANKRD28 | NUDCD2       | -0.53264374 | 0.47800788  | 1.01065162 | 1 |
| EPS15   | AMMECR1      | 0.46777925  | -0.5427329  | 1.01051215 | 1 |
| SERBP1  | ADGRA2       | -0.7642088  | 0.24621964  | 1.01042844 | 1 |
| KAT6B   | LOC100996693 | -0.3607878  | 0.6493609   | 1.0101487  | 1 |
| SNRPB2  | LMO3         | -0.7394573  | 0.2701803   | 1.0096376  | 1 |
| WDR59   | SLIRP        | 0.32823607  | -0.68037677 | 1.00861284 | 1 |
| RPRD1A  | CADM1        | -0.2997755  | 0.70847136  | 1.00824686 | 1 |
| ARPC5L  | CWF19L2      | -0.74136597 | 0.2667359   | 1.00810187 | 1 |
| COPB1   | TEC          | -0.38034344 | 0.62769663  | 1.00804007 | 1 |
| PID1    | ARHGEF12     | -0.84892863 | 0.15905389  | 1.00798252 | 1 |
| COMMD3  | TAOK3        | -0.4208585  | 0.5867488   | 1.0076073  | 1 |
| SEH1L   | WDTC1        | -0.8567451  | 0.15078372  | 1.00752882 | 1 |
| INIP    | FGFR1OP2     | 0.37000334  | -0.63704133 | 1.00704467 | 1 |
| RMI1    | RRAS         | -0.7891701  | 0.217509    | 1.0066791  | 1 |
| AMMECR1 | ATP6V1E2     | -0.2558377  | 0.7507725   | 1.0066102  | 1 |
| EFCAB14 | FAM57A       | -0.54524565 | 0.46129116  | 1.00653681 | 1 |
| B2M     | ASB9         | -0.5523001  | 0.4534073   | 1.0057074  | 1 |
| PELP1   | MCM5         | 0.696459    | -0.30912778 | 1.00558678 | 1 |
| BUB1B   | BIK          | 0.8427829   | -0.16162047 | 1.00440337 | 1 |
| MRPS12  | SPERT        | 0.33298618  | -0.67124724 | 1.00423342 | 1 |
| MED15   | PPIL2        | -0.3942871  | 0.6088987   | 1.0031858  | 1 |
| MAP4K4  | CFAP58       | 0.5051219   | -0.4978924  | 1.0030143  | 1 |
| KDR     | C1QTNF6      | -0.40240288 | 0.60012156  | 1.00252444 | 1 |
| NAB2    | SKA3         | -0.7885728  | 0.21379156  | 1.00236436 | 1 |
| WDR46   | CHD2         | -0.4220999  | 0.58014524  | 1.00224514 | 1 |
| TACC1   | GALNT2       | -0.39487213 | 0.6067073   | 1.00157943 | 1 |
| DCUN1D5 | PCED1B       | -0.5107049  | 0.49064955  | 1.00135445 | 1 |
| DCAF8   | DTL          | -0.75220406 | 0.24901359  | 1.00121765 | 1 |
| ZFAND5  | GPR155       | -0.4250454  | 0.57603616  | 1.00108156 | 1 |
| SAP18   | NEGR1        | -0.40275404 | 0.59820163  | 1.00095567 | 1 |
| SERBP1  | INIP         | 0.5518931   | -0.44884282 | 1.00073592 | 1 |
| SRSF1   | LNX1         | -0.84343237 | 0.15722166  | 1.00065403 | 1 |

|              |          |             |             |            |       |
|--------------|----------|-------------|-------------|------------|-------|
| TCEB3        | URI1     | 0.6499754   | -0.35017595 | 1.00015135 | 1     |
| ESRRG        | COPS7B   | 0.6647972   | -0.33521503 | 1.00001223 | 1     |
| CSNK1G2      | CDK10    | -0.22675765 | 0.8322353   | 1.05899295 | 0.964 |
| QKI          | DIEXF    | -0.55084234 | 0.58976936  | 1.1406117  | 0.944 |
| CDC7         | CDK10    | -0.71748704 | 0.61478335  | 1.33227039 | 0.915 |
| SRSF1        | NXF1     | -0.57557195 | 0.5786942   | 1.15426615 | 0.912 |
| ZNF202       | MZF1     | -0.3873601  | 0.66122246  | 1.04858256 | 0.909 |
| P4HA1        | PFDN4    | 0.8007077   | -0.79464555 | 1.59535325 | 0.908 |
| NAP1L1       | SERBP1   | -0.44640467 | 0.7054672   | 1.15187187 | 0.901 |
| SSRP1        | NAP1L1   | -0.51146024 | 0.49648282  | 1.00794306 | 0.896 |
| DNAJB1       | DNAJB2   | 0.74878323  | -0.26775053 | 1.01653376 | 0.884 |
| SSB          | LARP6    | -0.30586734 | 0.78756064  | 1.09342798 | 0.871 |
| ZWINT        | PDE4DIP  | -0.8203206  | 0.19987099  | 1.02019159 | 0.869 |
| COL1A1       | SDC2     | 0.40228355  | -0.6409002  | 1.04318375 | 0.867 |
| RAE1         | NXF1     | -0.3099789  | 0.84992075  | 1.15989965 | 0.866 |
| HNRNPL       | SNRPD3   | 0.34499562  | -0.70912737 | 1.05412299 | 0.861 |
| KANK1        | STX6     | -0.5675339  | 0.50640213  | 1.07393603 | 0.856 |
| HNRNPA1      | PRRC2A   | -0.5642691  | 0.49814156  | 1.06241066 | 0.856 |
| FHOD1        | EXOSC8   | -0.6887996  | 0.67712444  | 1.36592404 | 0.851 |
| HSPA1L       | HSPA1A   | -0.7127358  | 0.7443941   | 1.4571299  | 0.845 |
| ZBTB7A       | ZBTB24   | 0.51536334  | -0.5750412  | 1.09040454 | 0.843 |
| RBCK1        | KCNRG    | 0.65722334  | -0.45961252 | 1.11683586 | 0.838 |
| COL3A1       | LAMA1    | -0.65799004 | 0.62341124  | 1.28140128 | 0.837 |
| ESRRG        | FOXN3    | -0.5227986  | 0.5083067   | 1.0311053  | 0.831 |
| XPO1         | IPO11    | -0.6258964  | 0.54343957  | 1.16933597 | 0.826 |
| CDK6         | CDK10    | 0.37102935  | -0.79431385 | 1.1653432  | 0.825 |
| CTGF         | WISP1    | 0.68132305  | -0.5482444  | 1.22956745 | 0.818 |
| MRPL17       | POC1A    | 0.8826445   | -0.52615    | 1.4087945  | 0.815 |
| CADM1        | KIAA1715 | -0.68141055 | 0.63299024  | 1.31440079 | 0.815 |
| TNFAIP2      | HGF      | 0.71663713  | -0.5712255  | 1.28786263 | 0.815 |
| AIDA         | C10orf54 | 0.66780835  | -0.60333085 | 1.2711392  | 0.815 |
| NFIA         | AMMECR1  | 0.66065186  | -0.600358   | 1.26100986 | 0.815 |
| LOC100996693 | DNAJC9   | 0.52931434  | -0.7259336  | 1.25524794 | 0.815 |
| LZTS1        | TNFAIP2  | -0.52054703 | 0.7116318   | 1.23217883 | 0.815 |
| ATP6V1G1     | C10orf54 | -0.61456835 | 0.60099983  | 1.21556818 | 0.815 |
| EMC6         | HOXA7    | -0.6081232  | 0.59016865  | 1.19829185 | 0.815 |
| RSPO3        | MZF1     | 0.62120795  | -0.5679554  | 1.18916335 | 0.815 |
| ALDH4A1      | DFNB31   | 0.4930366   | -0.6560589  | 1.1490955  | 0.815 |
| ASB1         | DNAJC9   | -0.3834596  | 0.7550266   | 1.1384862  | 0.815 |
| FTL          | RSPO3    | -0.6523495  | 0.4827626   | 1.1351121  | 0.815 |
| ABCG1        | TEX10    | -0.74455565 | 0.37405452  | 1.11861017 | 0.815 |
| POLR2D       | NEGR1    | 0.6551444   | -0.4520929  | 1.1072373  | 0.815 |
| HDAC11       | MCM3     | -0.80089515 | 0.30178115  | 1.1026763  | 0.815 |
| CSR2BP       | DNAJC9   | -0.50650805 | 0.5806158   | 1.08712385 | 0.815 |
| GALNT2       | KIAA1715 | -0.35888886 | 0.7242846   | 1.08317346 | 0.815 |
| KCNRG        | DNAJC9   | 0.57508415  | -0.5019004  | 1.07698455 | 0.815 |
| ALAD         | PRICKLE1 | 0.50911564  | -0.56226206 | 1.0713777  | 0.815 |
| SCARB2       | DNAJC9   | -0.7732841  | 0.28791463  | 1.06119873 | 0.815 |
| SOD2         | IL32     | 0.606067    | -0.45107317 | 1.05714017 | 0.815 |
| MRPL17       | CAB39L   | -0.8894879  | 0.14118452  | 1.03067242 | 0.815 |
| TRAF3IP1     | MRPL17   | -0.8489572  | 0.18100812  | 1.02996532 | 0.815 |
| FOXM1        | DNAJC9   | 0.8464383   | -0.18082832 | 1.02726662 | 0.815 |
| DNAJC9       | DNAJC21  | -0.67156607 | 0.35332018  | 1.02488625 | 0.815 |
| TOP2A        | DNAJC9   | 0.8227552   | -0.19892383 | 1.02167903 | 0.815 |
| NFIA         | EMC6     | -0.39338788 | 0.62637     | 1.01975788 | 0.815 |
| EMC6         | ADM      | -0.22301282 | 0.7877839   | 1.01079672 | 0.815 |



|          |          |             |             |            |       |
|----------|----------|-------------|-------------|------------|-------|
| PPM1A    | C10orf54 | 0.542703    | -0.46755177 | 1.01025477 | 0.815 |
| GNAQ     | DNAJC9   | -0.62906575 | 0.37697747  | 1.00604322 | 0.815 |
| UBC      | DNAJC9   | -0.43428937 | 0.568463    | 1.00275237 | 0.815 |
| KLF12    | KIAA1715 | 0.4699251   | -0.5320963  | 1.0020214  | 0.815 |
| STAT3    | JUN      | 0.5783673   | -0.5161511  | 1.0945184  | 0.813 |
| MITF     | SOX4     | 0.26411024  | -0.75275457 | 1.01686481 | 0.813 |
| SDC2     | GSTM5    | 0.72626686  | -0.29309803 | 1.01936489 | 0.812 |
| TEAD4    | FOS      | 0.6803981   | -0.43715927 | 1.11755737 | 0.81  |
| SP3      | IKZF1    | -0.6090331  | 0.40366527  | 1.01269837 | 0.81  |
| STAT3    | ARNTL    | -0.43507928 | 0.82089096  | 1.25597024 | 0.806 |
| USP4     | USP9X    | -0.60097766 | 0.49917448  | 1.10015214 | 0.804 |
| NUDCD2   | HLA-C    | -0.7280905  | 0.48678458  | 1.21487508 | 0.802 |
| CCT3     | PFDN4    | 0.41293752  | -0.7455363  | 1.15847382 | 0.802 |
| STAT3    | FOS      | 0.7200754   | -0.7234661  | 1.4435415  | 0.797 |
| PDE4DIP  | DCUN1D5  | -0.32123178 | 0.72346514  | 1.04469692 | 0.796 |
| PFDN4    | EXOSC8   | 0.5361857   | -0.6293977  | 1.1655834  | 0.792 |
| UBC      | DIEXF    | -0.36890203 | 0.63682777  | 1.0057298  | 0.792 |
| LCMT2    | PCMTD1   | -0.5500099  | 0.79282504  | 1.34283494 | 0.791 |
| PLOD3    | P4HTM    | -0.4091011  | 0.7145684   | 1.1236695  | 0.791 |
| BUB1B    | STK36    | -0.4585298  | 0.5530535   | 1.0115833  | 0.791 |
| ICK      | CDK1     | -0.7219814  | 0.3079972   | 1.0299786  | 0.79  |
| PGF      | C8orf4   | 0.67974925  | -0.32031363 | 1.00006288 | 0.789 |
| NOL8     | ESRP2    | 0.58806103  | -0.5204917  | 1.10855273 | 0.788 |
| FLNB     | FANCG    | -0.6194927  | 0.40556452  | 1.02505722 | 0.788 |
| CCT6A    | PFDN4    | 0.5090917   | -0.63450265 | 1.14359435 | 0.786 |
| TAOK3    | MAPK13   | -0.55625266 | 0.48827466  | 1.04452732 | 0.786 |
| CBX3     | NOP56    | -0.47170082 | 0.570689    | 1.04238982 | 0.786 |
| UBC      | TBRG4    | -0.6679893  | 0.40027618  | 1.06826548 | 0.782 |
| PDE4DIP  | SLIRP    | -0.5743951  | 0.7516256   | 1.3260207  | 0.779 |
| KIAA0101 | COL1A1   | -0.52437705 | 0.5913987   | 1.11577575 | 0.779 |
| STAT3    | JUNB     | 0.62601656  | -0.5454114  | 1.17142796 | 0.772 |
| GSTM1    | GSTM5    | 0.8144388   | -0.32727993 | 1.14171873 | 0.771 |
| CASP6    | MALT1    | -0.6552626  | 0.4567788   | 1.1120414  | 0.769 |
| NDFIP2   | HSPB8    | -0.5175481  | 0.5286341   | 1.0461822  | 0.769 |
| DLGAP1   | FLNB     | -0.36030015 | 0.6397461   | 1.00004625 | 0.768 |
| PAX2     | KLF12    | -0.28146842 | 0.7843493   | 1.06581772 | 0.766 |
| KIRREL   | NOL8     | -0.37321374 | 0.79609835  | 1.16931209 | 0.764 |
| EPS15    | CCT3     | -0.65270823 | 0.48376718  | 1.13647541 | 0.763 |
| PPIL2    | TRIM21   | -0.36593443 | 0.6570427   | 1.02297713 | 0.761 |
| CAP2     | TBRG4    | -0.5453762  | 0.47270718  | 1.01808338 | 0.76  |
| ZHX2     | ZNF202   | -0.4670785  | 0.8016713   | 1.2687498  | 0.759 |
| SP3      | ZNF704   | 0.42617965  | -0.68144774 | 1.10762739 | 0.759 |
| WRAP53   | CHD2     | -0.73855925 | 0.33959028  | 1.07814953 | 0.759 |
| SSB      | DCAF13   | 0.7445243   | -0.2836994  | 1.0282237  | 0.759 |
| GTF2I    | SOX4     | 0.71291053  | -0.47237834 | 1.18528887 | 0.758 |
| RUFY3    | FANCI    | -0.72921365 | 0.4386647   | 1.16787835 | 0.758 |
| AIDA     | VPS16    | 0.6559119   | -0.48493427 | 1.14084617 | 0.758 |
| PDE4DIP  | MOCOS    | -0.67457616 | 0.41170415  | 1.08628031 | 0.758 |
| KIAA0101 | RIMS2    | 0.5761811   | -0.42500842 | 1.00118952 | 0.757 |
| SIRT7    | PELP1    | 0.31591538  | -0.8010819  | 1.11699728 | 0.754 |
| CTNNA1   | LRRRC16A | -0.58339894 | 0.5230261   | 1.10642504 | 0.754 |
| COL1A1   | LAMA1    | -0.49565515 | 0.5162164   | 1.01187155 | 0.753 |
| ABI2     | HTATSF1  | 0.43066204  | -0.68601036 | 1.1166724  | 0.75  |
| GTF3C2   | MTHFSD   | 0.2629797   | -0.84749097 | 1.11047067 | 0.75  |
| CCT3     | SYCP2    | -0.7417758  | 0.36332184  | 1.10509764 | 0.75  |
| PFDN4    | PPP1R13L | 0.55293137  | -0.5298478  | 1.08277917 | 0.75  |

|          |          |             |             |            |       |
|----------|----------|-------------|-------------|------------|-------|
| ARNTL    | RRBP1    | -0.52673286 | 0.5294475   | 1.05618036 | 0.75  |
| KLF12    | TIAL1    | 0.12928444  | -0.9057491  | 1.03503354 | 0.75  |
| ZCCHC24  | IRF1     | 0.39271316  | -0.6271717  | 1.01988486 | 0.75  |
| WWTR1    | AMOT     | -0.59752774 | 0.63270485  | 1.23023259 | 0.749 |
| CALD1    | HLA-G    | 0.637929    | -0.36221766 | 1.00014666 | 0.749 |
| PIIB     | HNRNPL   | 0.5447583   | -0.50198734 | 1.04674564 | 0.748 |
| KSR1     | DDR2     | 0.32826757  | -0.68470216 | 1.01296973 | 0.745 |
| ESRRG    | KANK1    | -0.4917046  | 0.77668875  | 1.26839335 | 0.744 |
| SERPINA1 | CTNNA1   | -0.40989202 | 0.59800124  | 1.00789326 | 0.744 |
| TNC      | LOX      | 0.66996866  | -0.45230088 | 1.12226954 | 0.743 |
| COL1A1   | EFEMP2   | 0.7572437   | -0.25757506 | 1.01481876 | 0.743 |
| ESRRG    | PDE4DIP  | -0.63184583 | 0.65505725  | 1.28690308 | 0.739 |
| TRAP1    | APP      | -0.42484367 | 0.6357621   | 1.06060577 | 0.739 |
| DCUN1D5  | HLA-C    | -0.44687223 | 0.5940498   | 1.04092203 | 0.738 |
| PDE4DIP  | ERP44    | -0.42722142 | 0.5973411   | 1.02456252 | 0.738 |
| ITGB1    | COL1A1   | 0.3337619   | -0.7299039  | 1.0636658  | 0.735 |
| MYOM1    | ARPC5L   | -0.67755723 | 0.36501363  | 1.04257086 | 0.735 |
| ESRRG    | PVR      | 0.7541373   | -0.3593888  | 1.1135261  | 0.734 |
| UBC      | MRPL9    | -0.4282755  | 0.61211324  | 1.04038874 | 0.733 |
| AIMP1    | PFDN4    | 0.6637982   | -0.37550443 | 1.03930263 | 0.733 |
| SSRP1    | PFDN4    | 0.4182255   | -0.60507095 | 1.02329645 | 0.733 |
| PDE4DIP  | FGFR1OP2 | -0.6609982  | 0.35716468  | 1.01816288 | 0.732 |
| QKI      | PNPT1    | -0.6164963  | 0.55719644  | 1.17369274 | 0.728 |
| CAP2     | NAB2     | 0.55788994  | -0.595908   | 1.15379794 | 0.728 |
| IGF2R    | CALD1    | 0.60491306  | -0.43061996 | 1.03553302 | 0.728 |
| DDX6     | DDX54    | -0.61319894 | 0.57970726  | 1.1929062  | 0.727 |
| ESRRG    | NFIA     | -0.7137432  | 0.36423326  | 1.07797646 | 0.727 |
| MCM6     | CBX3     | -0.23152962 | 0.8249951   | 1.05652472 | 0.727 |
| NAP1L1   | BID      | -0.6549522  | 0.39993054  | 1.05488274 | 0.726 |
| POSTN    | NUDCD2   | -0.4658458  | 0.6939619   | 1.1598077  | 0.725 |
| BID      | BCL2L1   | 0.6780408   | -0.51420134 | 1.19224214 | 0.723 |
| ESRRG    | PTTG1    | 0.58200264  | -0.5458637  | 1.12786634 | 0.723 |
| CEACAM1  | SSFA2    | -0.3781209  | 0.6864549   | 1.0645758  | 0.723 |
| CSRP2BP  | GET4     | -0.6641821  | 0.4188429   | 1.083025   | 0.722 |
| EFEMP2   | NID2     | 0.61518186  | -0.56723356 | 1.18241542 | 0.721 |
| SCARB2   | GIPC1    | 0.50431967  | -0.6062013  | 1.11052097 | 0.721 |
| LAMA1    | CNTNAP1  | -0.3957782  | 0.7160822   | 1.1118604  | 0.72  |
| UBC      | TIMELESS | -0.38052148 | 0.6916902   | 1.07221168 | 0.719 |
| MAP1B    | RPL14    | -0.59971946 | 0.46552166  | 1.06524112 | 0.719 |
| ABI2     | NOL8     | 0.79753774  | -0.38143715 | 1.17897489 | 0.718 |
| GALNT11  | GALNT2   | -0.7279422  | 0.33548272  | 1.06342492 | 0.717 |
| EPS15    | ESRRG    | -0.47418997 | 0.54574496  | 1.01993493 | 0.716 |
| YWHAG    | CCND2    | -0.5877914  | 0.42935923  | 1.01715063 | 0.715 |
| ESRRG    | PARVA    | -0.6211608  | 0.67109597  | 1.29225677 | 0.714 |
| SORBS1   | COL5A1   | 0.4843188   | -0.54093426 | 1.02525306 | 0.714 |
| HSD17B1  | HSD11B1  | -0.5437215  | 0.59811795  | 1.14183945 | 0.712 |
| TXNIP    | SMAD7    | -0.48638016 | 0.55969864  | 1.0460788  | 0.712 |
| QKI      | CNOT11   | -0.55218977 | 0.73432446  | 1.28651423 | 0.711 |
| EPS15    | PSMB3    | -0.70325464 | 0.5374246   | 1.24067924 | 0.711 |
| CD47     | CTNNA1   | -0.8061776  | 0.62431586  | 1.43049346 | 0.708 |
| ADAM22   | NDFIP2   | -0.76740295 | 0.2616655   | 1.02906845 | 0.706 |
| SHQ1     | COL5A1   | -0.36673638 | 0.70004374  | 1.06678012 | 0.705 |
| GDF5     | FIGF     | -0.26984397 | 0.7534625   | 1.02330647 | 0.705 |
| CAST     | RBM45    | -0.34418926 | 0.8180549   | 1.16224416 | 0.704 |
| COL5A1   | SDC2     | 0.59049535  | -0.4870071  | 1.07750245 | 0.703 |
| UBC      | DHX30    | -0.39483097 | 0.67189497  | 1.06672594 | 0.703 |



|          |          |             |             |            |       |
|----------|----------|-------------|-------------|------------|-------|
| CRYZL1   | TP53I3   | 0.6626646   | -0.6270307  | 1.2896953  | 0.701 |
| CALD1    | GABBR1   | -0.45572054 | 0.5961504   | 1.05187094 | 0.7   |
| KMT2E    | RTP4     | 0.62693214  | -0.40790692 | 1.03483906 | 0.7   |
| PCNA     | TOP2A    | 0.816714    | -0.48899704 | 1.30571104 | 0.699 |
| AGPAT5   | CSPG5    | -0.40926233 | 0.7721068   | 1.18136913 | 0.699 |
| ARHGEF2  | RCC2     | -0.88251185 | 0.43579084  | 1.31830269 | 0.698 |
| PCNA     | TEFM     | -0.5488623  | 0.48797062  | 1.03683292 | 0.698 |
| SFN      | SERBP1   | 0.71890205  | -0.46149254 | 1.18039459 | 0.696 |
| USP9X    | MALT1    | -0.80719745 | 0.35338166  | 1.16057911 | 0.696 |
| RARA     | ARNTL    | -0.6977274  | 0.445814    | 1.1435414  | 0.696 |
| MYOC     | INTS6    | 0.5125604   | -0.5876353  | 1.1001957  | 0.696 |
| APBB2    | TOR1AIP1 | 0.7359421   | -0.35006818 | 1.08601028 | 0.696 |
| CUX1     | CTNNA1   | -0.80673116 | 0.5041051   | 1.31083626 | 0.695 |
| UBC      | STX6     | -0.47045258 | 0.7437598   | 1.21421238 | 0.694 |
| CALD1    | COL3A1   | 0.7369608   | -0.42747268 | 1.16443348 | 0.694 |
| EPS8     | HPS6     | -0.69223696 | 0.33090472  | 1.02314168 | 0.694 |
| SERPINA1 | CLSTN1   | -0.25358465 | 0.7721847   | 1.02576935 | 0.692 |
| STK10    | ADPGK    | -0.21074618 | 0.8058027   | 1.01654888 | 0.692 |
| CD69     | SPIN3    | -0.42560267 | 0.5926242   | 1.01822687 | 0.691 |
| PSMB2    | SPG20    | -0.7259946  | 0.8019689   | 1.5279635  | 0.69  |
| LDLRAD4  | CNOT11   | -0.6005252  | 0.7011989   | 1.3017241  | 0.69  |
| EFCAB14  | EFHD2    | -0.5642069  | 0.6961921   | 1.260399   | 0.69  |
| LDLRAD4  | TIMELESS | -0.6573043  | 0.5827976   | 1.2401019  | 0.69  |
| NAALADL2 | MSRB1    | -0.56262267 | 0.6737894   | 1.23641207 | 0.69  |
| LDLRAD4  | UBE2B    | 0.8111707   | -0.39975074 | 1.21092144 | 0.69  |
| NEGR1    | SEMA4B   | 0.5695496   | -0.6230023  | 1.1925519  | 0.69  |
| ESRRG    | LDLRAD4  | -0.5257557  | 0.65377116  | 1.17952686 | 0.69  |
| LDLRAD4  | GET4     | -0.57808375 | 0.5731146   | 1.15119835 | 0.69  |
| ZBTB10   | MSRB1    | -0.69867396 | 0.43466866  | 1.13334262 | 0.69  |
| ZNF106   | MYL12A   | -0.667963   | 0.45492303  | 1.12288603 | 0.69  |
| XRCC5    | LDLRAD4  | -0.4865959  | 0.6105527   | 1.0971486  | 0.69  |
| PARPBP   | MYO19    | 0.83737975  | -0.2594363  | 1.09681605 | 0.69  |
| LDLRAD4  | PRICKLE1 | 0.6908707   | -0.39948794 | 1.09035864 | 0.69  |
| COL4A1   | ACTN3    | 0.45797643  | -0.6141607  | 1.07213713 | 0.69  |
| OPRK1    | LDLRAD4  | -0.61761147 | 0.4482097   | 1.06582117 | 0.69  |
| FAM129B  | TIMM23   | 0.4257001   | -0.61983716 | 1.04553726 | 0.69  |
| NGFR     | TMOD2    | -0.39564335 | 0.64618427  | 1.04182762 | 0.69  |
| APC      | STX17    | -0.4837778  | 0.5566598   | 1.0404376  | 0.69  |
| ZWINT    | LDLRAD4  | -0.7026666  | 0.3311873   | 1.0338539  | 0.69  |
| MCM6     | LDLRAD4  | -0.5184038  | 0.5024719   | 1.0208757  | 0.69  |
| LDLRAD4  | GALNT2   | -0.514632   | 0.4986503   | 1.0132823  | 0.69  |
| LDLRAD4  | CCT3     | -0.5140807  | 0.49695292  | 1.01103362 | 0.69  |
| ESRRG    | SORBS1   | -0.54498845 | 0.73174226  | 1.27673071 | 0.689 |
| ZWINT    | SCML2    | 0.4276383   | -0.6348283  | 1.0624666  | 0.689 |
| CBX3     | DDX39A   | -0.2496942  | 0.7946061   | 1.0443003  | 0.689 |
| ESRRG    | IL4      | 0.7409403   | -0.3611838  | 1.1021241  | 0.688 |
| CADM1    | PRKRIR   | -0.4563288  | 0.54857373  | 1.00490253 | 0.688 |
| APC      | ZWINT    | -0.28098065 | 0.8400697   | 1.12105035 | 0.687 |
| UBE2H    | CBX3     | 0.40497738  | -0.6029431  | 1.00792048 | 0.687 |
| MUC1     | CTNNA1   | -0.85999155 | 0.39518526  | 1.25517681 | 0.686 |
| KIAA0101 | MOCOS    | 0.71442765  | -0.34855816 | 1.06298581 | 0.686 |
| XRCC5    | RGS5     | -0.6820114  | 0.4670268   | 1.1490382  | 0.685 |
| UBC      | PNPT1    | -0.3008409  | 0.7290713   | 1.0299122  | 0.683 |
| KARS     | CSDE1    | -0.5289772  | 0.5211677   | 1.0501449  | 0.682 |
| GRWD1    | FOXP2    | -0.58140016 | 0.47807494  | 1.0594751  | 0.681 |
| ABI2     | IFT81    | 0.582227    | -0.50003743 | 1.08226443 | 0.68  |

|          |          |             |             |            |       |
|----------|----------|-------------|-------------|------------|-------|
| UBC      | ZWINT    | -0.5954513  | 0.4346751   | 1.0301264  | 0.679 |
| PARK2    | FTL      | -0.56185335 | 0.77378285  | 1.3356362  | 0.678 |
| WVOX     | CADM1    | -0.532145   | 0.57086766  | 1.10301266 | 0.678 |
| KLF4     | SCML2    | -0.41872182 | 0.6661863   | 1.08490812 | 0.675 |
| RUFY3    | NDFIP2   | -0.6085199  | 0.5061176   | 1.1146375  | 0.674 |
| SP3      | HDAC1    | -0.43330374 | 0.6773109   | 1.11061464 | 0.673 |
| SMAD7    | CADM1    | -0.3598246  | 0.69732666  | 1.05715126 | 0.673 |
| LTA      | CD40     | 0.601374    | -0.45353138 | 1.05490538 | 0.672 |
| IGF2R    | ACTN3    | 0.3440902   | -0.82413274 | 1.16822294 | 0.671 |
| ESRRG    | DNAJB2   | -0.7207885  | 0.29283985  | 1.01362835 | 0.671 |
| RACGAP1  | SNX18    | -0.39255902 | 0.70535016  | 1.09790918 | 0.67  |
| BLOC1S6  | ABI2     | 0.50106245  | -0.54237187 | 1.04343432 | 0.67  |
| ORC5     | ABI2     | 0.6011006   | -0.40033844 | 1.00143904 | 0.67  |
| SFN      | RPS2     | 0.6195587   | -0.51567465 | 1.13523335 | 0.669 |
| STX7     | STK10    | 0.51113576  | -0.58835524 | 1.099491   | 0.668 |
| IGF2R    | NUDT21   | -0.4874406  | 0.70636874  | 1.19380934 | 0.667 |
| CSTF3    | TOP2A    | 0.6826116   | -0.47755593 | 1.16016753 | 0.667 |
| EPS15    | SNRPB2   | -0.41180673 | 0.6403269   | 1.05213363 | 0.667 |
| TBL1X    | RGS3     | -0.27797696 | 0.7365691   | 1.01454606 | 0.667 |
| PTTG1IP  | TOP3A    | -0.7134585  | 0.6479284   | 1.3613869  | 0.666 |
| SERBP1   | TOP2A    | 0.8048916   | -0.31118912 | 1.11608072 | 0.665 |
| ITSN1    | STX6     | -0.7359009  | 0.35485414  | 1.09075504 | 0.665 |
| ANXA11   | ELOVL5   | -0.58424765 | 0.47362718  | 1.05787483 | 0.665 |
| KLF12    | TIMELESS | 0.39968038  | -0.6392183  | 1.03889868 | 0.665 |
| PTPN2    | CTNNA1   | -0.63019276 | 0.55935156  | 1.18954432 | 0.664 |
| TOR1AIP1 | GSTM5    | 0.47559306  | -0.62589824 | 1.1014913  | 0.664 |
| SRSF1    | NID2     | -0.4202769  | 0.7032825   | 1.1235594  | 0.663 |
| DCN      | KANK1    | 0.7766999   | -0.2558911  | 1.032591   | 0.662 |
| HDAC11   | DNAJC9   | -0.7757294  | 0.30704254  | 1.08277194 | 0.661 |
| DDX6     | TUFM     | -0.2598255  | 0.81133866  | 1.07116416 | 0.661 |
| PPIA     | HLA-C    | -0.36266574 | 0.66943187  | 1.03209761 | 0.661 |
| CSTF3    | HLA-G    | -0.59477663 | 0.783978    | 1.37875463 | 0.66  |
| VCAM1    | STX7     | 0.5451238   | -0.6361771  | 1.1813009  | 0.66  |
| MYOC     | NAB2     | 0.44379443  | -0.59403217 | 1.0378266  | 0.66  |
| NAP1L1   | PEX5     | -0.49201137 | 0.63946354  | 1.13147491 | 0.659 |
| SCRN1    | TPM4     | 0.45293704  | -0.6347734  | 1.08771044 | 0.659 |
| ZNF148   | HDAC1    | -0.5784274  | 0.6275175   | 1.2059449  | 0.658 |
| HINFP    | ZNF704   | 0.55269563  | -0.57949    | 1.13218563 | 0.658 |
| RAB11A   | OPTN     | -0.6281144  | 0.39885807  | 1.02697247 | 0.658 |
| WBP4     | ARHGEF12 | -0.8427173  | 0.15959619  | 1.00231349 | 0.658 |
| LAMA4    | POLDIP3  | -0.68610704 | 0.59920406  | 1.2853111  | 0.657 |
| KARS     | AHNAK    | -0.78242654 | 0.3547428   | 1.13716934 | 0.657 |
| RANGAP1  | PNPT1    | 0.58743787  | -0.52351886 | 1.11095673 | 0.657 |
| QKI      | MOCOS    | -0.59548956 | 0.45025384  | 1.0457434  | 0.657 |
| SERBP1   | SPG20    | -0.57173276 | 0.61413366  | 1.18586642 | 0.656 |
| NUP62    | BFSP1    | -0.5619732  | 0.5289272   | 1.0909004  | 0.656 |
| ATP1A2   | PRUNE2   | 0.521971    | -0.57466865 | 1.09663965 | 0.655 |
| ESRRG    | PRRC2A   | 0.6343329   | -0.588512   | 1.2228449  | 0.654 |
| TOP2A    | EXOSC8   | 0.60555494  | -0.5838029  | 1.18935784 | 0.654 |
| BZW2     | TEFM     | -0.6958247  | 0.4695608   | 1.1653855  | 0.654 |
| RCC2     | HLA-B    | -0.53295356 | 0.61733496  | 1.15028852 | 0.654 |
| ESRRG    | QKI      | -0.34581143 | 0.71304744  | 1.05885887 | 0.654 |
| ESRRG    | RTN4     | -0.5156167  | 0.709066    | 1.2246827  | 0.652 |
| APC      | TMED5    | -0.43034574 | 0.59760207  | 1.02794781 | 0.652 |
| CAST     | XRCC5    | -0.4013713  | 0.828773    | 1.2301443  | 0.651 |
| RUVBL2   | MCM4     | 0.8200741   | -0.3568373  | 1.1769114  | 0.651 |

|          |          |             |             |            |       |
|----------|----------|-------------|-------------|------------|-------|
| HIVEP3   | ZNF467   | 0.50646406  | -0.5126283  | 1.01909236 | 0.651 |
| LAMA1    | COL5A1   | -0.40478745 | 0.7146711   | 1.11945855 | 0.65  |
| TOP2A    | DNMT1    | 0.6709932   | -0.44785297 | 1.11884617 | 0.65  |
| SERBP1   | GTF2I    | -0.6768561  | 0.33753642  | 1.01439252 | 0.65  |
| EPS8     | FANCI    | -0.6969327  | 0.36316445  | 1.06009715 | 0.649 |
| STAT5B   | SOX4     | 0.54572093  | -0.73821187 | 1.2839328  | 0.647 |
| SERPINA1 | ESRRG    | 0.53184414  | -0.53754646 | 1.0693906  | 0.647 |
| AMOT     | HSPA14   | 0.30245754  | -0.7239107  | 1.02636824 | 0.647 |
| CYTH2    | PHLDB2   | 0.54781055  | -0.4710974  | 1.01890795 | 0.646 |
| CCT3     | KCNRG    | 0.6988981   | -0.67004406 | 1.36894216 | 0.645 |
| GTF2I    | STX6     | -0.7897     | 0.52001107  | 1.30971107 | 0.645 |
| ARPC5L   | CSRP2BP  | -0.65855473 | 0.48565644  | 1.14421117 | 0.645 |
| ZWINT    | KATNAL1  | -0.69113505 | 0.4427822   | 1.13391725 | 0.645 |
| VEGFA    | PFDN4    | 0.3751019   | -0.66815436 | 1.04325626 | 0.645 |
| DKC1     | TOP2A    | 0.7207499   | -0.5431717  | 1.2639216  | 0.644 |
| GNAQ     | RACGAP1  | -0.53943247 | 0.63008803  | 1.1695205  | 0.644 |
| LRRC16A  | LZTS1    | -0.5200607  | 0.51440674  | 1.03446744 | 0.644 |
| CSTF3    | HLA-B    | -0.40256575 | 0.86526024  | 1.26782599 | 0.643 |
| TUFM     | HLA-C    | -0.5745392  | 0.6098776   | 1.1844168  | 0.643 |
| GNAL     | ARPP21   | -0.5579378  | 0.5816815   | 1.1396193  | 0.643 |
| MAP1B    | TRIM14   | 0.56764406  | -0.4892745  | 1.05691856 | 0.643 |
| SLC37A4  | SLC46A3  | -0.6315035  | 0.39373267  | 1.02523617 | 0.643 |
| KLF12    | CCT3     | 0.21877795  | -0.8040697  | 1.02284765 | 0.643 |
| IGF1     | AP3M1    | -0.7526485  | 0.45096508  | 1.20361358 | 0.642 |
| PCCB     | CEACAM1  | 0.53249294  | -0.4782593  | 1.01075224 | 0.642 |
| UBC      | PCNA     | -0.5420241  | 0.6319789   | 1.174003   | 0.641 |
| PDE4DIP  | PDHB     | -0.3073981  | 0.74493796  | 1.05233606 | 0.64  |
| SEPT11   | PARP14   | 0.3131131   | -0.7276701  | 1.0407832  | 0.64  |
| SERPINA1 | COL5A1   | -0.50202477 | 0.8716276   | 1.37365237 | 0.639 |
| APC      | NUTF2    | -0.61029077 | 0.65565896  | 1.26594973 | 0.639 |
| HDAC1    | GTF2I    | -0.7143855  | 0.33260393  | 1.04698943 | 0.639 |
| SNAP29   | DBI      | -0.29147232 | 0.8037116   | 1.09518392 | 0.638 |
| RAB35    | RAB11A   | 0.7514887   | -0.29974625 | 1.05123495 | 0.638 |
| PDE4DIP  | RACGAP1  | -0.5779714  | 0.4925445   | 1.0705159  | 0.637 |
| QKI      | MED31    | -0.43937474 | 0.5682688   | 1.00764354 | 0.637 |
| MAP1B    | CD40     | 0.49613935  | -0.67409074 | 1.17023009 | 0.636 |
| KSR1     | CCT3     | -0.55880284 | 0.6099007   | 1.16870354 | 0.636 |
| SET      | KIRREL   | -0.7055112  | 0.40080148  | 1.10631268 | 0.636 |
| HTT      | OPRK1    | -0.63296664 | 0.42336932  | 1.05633596 | 0.636 |
| DLG1     | CADM1    | -0.4899295  | 0.51186776  | 1.00179726 | 0.636 |
| GNPTAB   | TIRAP    | -0.48869073 | 0.63363916  | 1.12232989 | 0.635 |
| VCAM1    | AIDA     | 0.25666496  | -0.8242073  | 1.08087226 | 0.635 |
| APC      | MED31    | -0.5342431  | 0.66795975  | 1.20220285 | 0.634 |
| TOP2A    | PNPT1    | 0.65077364  | -0.6601712  | 1.31094484 | 0.632 |
| APC      | PSMB3    | -0.51573616 | 0.6981604   | 1.21389656 | 0.632 |
| MRPS14   | PHF5A    | -0.43329734 | 0.6164956   | 1.04979294 | 0.631 |
| ZNF426   | EFEMP2   | 0.70492     | -0.30955058 | 1.01447058 | 0.631 |
| CNKSR2   | ARHGEF12 | -0.700485   | 0.357958    | 1.058443   | 0.63  |
| CAST     | ABI2     | 0.35160077  | -0.6891022  | 1.04070297 | 0.63  |
| SCML2    | PER3     | -0.60513276 | 0.5776438   | 1.18277656 | 0.629 |
| SFN      | PSMB3    | 0.6704302   | -0.50959593 | 1.18002613 | 0.629 |
| APC      | AGPAT5   | -0.46867555 | 0.5509405   | 1.01961605 | 0.628 |
| TBL1XR1  | MLST8    | 0.44174793  | -0.67253107 | 1.114279   | 0.627 |
| ELOVL6   | TNS1     | 0.7976853   | -0.24186252 | 1.03954782 | 0.627 |
| DCUN1D5  | KLF12    | 0.31545037  | -0.86744386 | 1.18289423 | 0.626 |
| PALLD    | MAP4     | 0.6354828   | -0.43082902 | 1.06631182 | 0.626 |

|          |         |             |             |            |       |
|----------|---------|-------------|-------------|------------|-------|
| NOD1     | CASP2   | 0.37777826  | -0.6510643  | 1.02884256 | 0.626 |
| TNC      | THBS1   | 0.48590118  | -0.57446855 | 1.06036973 | 0.625 |
| GNAQ     | CNOT11  | -0.55279833 | 0.73550224  | 1.28830057 | 0.624 |
| CSNK2A1  | QKI     | -0.47369668 | 0.80256504  | 1.27626172 | 0.624 |
| CTNNA1   | ELF4    | -0.32121375 | 0.7762791   | 1.09749285 | 0.624 |
| HSP90AA1 | HNRNPC  | 0.4835374   | -0.57838184 | 1.06191924 | 0.624 |
| PARP9    | NTNG2   | 0.2547608   | -0.7639992  | 1.01876    | 0.624 |
| CSNK2A1  | CLASP2  | 0.17319344  | -0.8492957  | 1.02248914 | 0.623 |
| UBE2H    | PFDN4   | -0.4290003  | 0.590329    | 1.0193293  | 0.623 |
| ADAM10   | CTNNA1  | -0.52761173 | 0.6141549   | 1.14176663 | 0.622 |
| PPP3CB   | CNOT11  | -0.47362438 | 0.65018284  | 1.12380722 | 0.622 |
| KATNAL1  | CNOT11  | -0.43312544 | 0.68765     | 1.12077544 | 0.622 |
| KIAA0101 | SCML2   | 0.48726758  | -0.5264521  | 1.01371968 | 0.622 |
| EPS15    | RACGAP1 | -0.6537358  | 0.72451884  | 1.37825464 | 0.621 |
| UBE2B    | RTN4    | 0.8929009   | -0.31329998 | 1.20620088 | 0.621 |
| PCNA     | QKI     | -0.6723786  | 0.51972324  | 1.19210184 | 0.621 |
| UBC      | ESRRG   | -0.5287906  | 0.49817026  | 1.02696086 | 0.621 |
| VCAM1    | SEPT11  | 0.52393156  | -0.6083982  | 1.13232976 | 0.62  |
| TRIM2    | BCAR1   | -0.6255761  | 0.46121898  | 1.08679508 | 0.62  |
| ZWINT    | ZHX2    | -0.55164146 | 0.48557505  | 1.03721651 | 0.62  |
| SH3PXD2A | PDLIM4  | -0.5195822  | 0.53528446  | 1.05486666 | 0.619 |
| CTNNA1   | ADAMTS3 | -0.68176335 | 0.5528184   | 1.23458175 | 0.618 |
| XRCC5    | CPNE3   | -0.647098   | 0.5718199   | 1.2189179  | 0.618 |
| KARS     | PDE4DIP | -0.591933   | 0.6040287   | 1.1959617  | 0.618 |
| ESRRG    | MLC1    | 0.71634066  | -0.4426236  | 1.15896426 | 0.618 |
| TOP2A    | HDAC1   | 0.72864985  | -0.424231   | 1.15288085 | 0.618 |
| ZHX2     | CEP68   | 0.5992194   | -0.44353366 | 1.04275306 | 0.618 |
| PTPRN2   | SLAMF1  | -0.6077708  | 0.41324285  | 1.02101365 | 0.618 |
| SNRPC    | VAMP4   | -0.61024857 | 0.5652271   | 1.17547567 | 0.616 |
| RACGAP1  | KANK1   | -0.6832969  | 0.40213504  | 1.08543194 | 0.616 |
| CST2     | RCC2    | 0.4302196   | -0.6264897  | 1.0567093  | 0.616 |
| SCARB2   | RPL14   | -0.22240694 | 0.7931292   | 1.01553614 | 0.616 |
| GSTT1    | CIT     | -0.5345158  | 0.47136754  | 1.00588334 | 0.616 |
| ARNTL    | MLXIP   | -0.6965945  | 0.5013171   | 1.1979116  | 0.615 |
| KPNA4    | LIF     | 0.31533054  | -0.7251153  | 1.04044584 | 0.615 |
| DDX20    | SUFU    | -0.5386305  | 0.6417277   | 1.1803582  | 0.613 |
| MIR3917  | NUDT21  | 0.69483787  | -0.3623577  | 1.05719557 | 0.613 |
| SH3PXD2A | TAB2    | -0.74847454 | 0.44730538  | 1.19577992 | 0.612 |
| EZH2     | TOP2A   | 0.9200974   | -0.20291199 | 1.12300939 | 0.611 |
| TOP2A    | NOP2    | 0.6007039   | -0.4695227  | 1.0702266  | 0.61  |
| DNMT1    | RTN4    | -0.6279068  | 0.40212762  | 1.03003442 | 0.609 |
| SMYD3    | MDN1    | -0.7415718  | 0.5442571   | 1.2858289  | 0.608 |
| STX8     | RACGAP1 | -0.72435915 | 0.4225021   | 1.14686125 | 0.608 |
| APC      | TRMT1   | -0.51154655 | 0.6210714   | 1.13261795 | 0.608 |
| NAP1L1   | CD40    | -0.6689553  | 0.37472323  | 1.04367853 | 0.608 |
| PLCB4    | NUDCD2  | -0.6758708  | 0.3412433   | 1.0171141  | 0.608 |
| KLF12    | MED31   | 0.4543897   | -0.70844424 | 1.16283394 | 0.607 |
| SRSF1    | WAC     | -0.41110066 | 0.6777352   | 1.08883586 | 0.607 |
| SNX5     | GALNT2  | -0.59128505 | 0.481777    | 1.07306205 | 0.607 |
| PPP2CB   | ESRRG   | -0.41394582 | 0.64143634  | 1.05538216 | 0.607 |
| KARS     | OSR2    | -0.7589206  | 0.56658095  | 1.32550155 | 0.606 |
| NAALADL2 | GGCT    | -0.6228409  | 0.67354214  | 1.29638304 | 0.606 |
| ANKRD28  | MTHFD1L | -0.39404166 | 0.801708    | 1.19574966 | 0.606 |
| C4A      | VANGL1  | -0.54589427 | 0.629502    | 1.17539627 | 0.606 |
| XPNPEP1  | DFNB31  | -0.31586328 | 0.7643926   | 1.08025588 | 0.606 |
| TUFM     | CRY2    | -0.6256237  | 0.48006207  | 1.10568577 | 0.605 |

|          |           |             |             |            |       |
|----------|-----------|-------------|-------------|------------|-------|
| MCM6     | HLA-B     | -0.44576102 | 0.6338162   | 1.07957722 | 0.605 |
| SEPT11   | TGM2      | 0.36117458  | -0.6524439  | 1.01361848 | 0.605 |
| GALNT2   | HIST1H2BE | 0.66363394  | -0.34017998 | 1.00381392 | 0.605 |
| CLIP1    | GPC1      | 0.7214304   | -0.4187191  | 1.1401495  | 0.604 |
| CDK6     | IL1A      | -0.6573744  | 0.635505    | 1.2928794  | 0.603 |
| USP4     | PIK3IP1   | -0.6369051  | 0.49503773  | 1.13194283 | 0.603 |
| TCF3     | C1QBP     | 0.6729451   | -0.41988254 | 1.09282764 | 0.602 |
| NTRK2    | HSP90AA1  | -0.6441401  | 0.4206457   | 1.0647858  | 0.602 |
| HSP90AA1 | PIIB      | 0.52669966  | -0.5197287  | 1.04642836 | 0.602 |
| TRIAP1   | TLN2      | -0.48838192 | 0.5409843   | 1.02936622 | 0.602 |
| ASB6     | ASB14     | 0.27414504  | -0.7462184  | 1.02036344 | 0.602 |
| AGPAT5   | ASB1      | -0.25459918 | 0.7628178   | 1.01741698 | 0.602 |
| SET      | RANGAP1   | 0.6226386   | -0.5360075  | 1.1586461  | 0.601 |
| NXF1     | NUP62     | -0.4826116  | 0.5684447   | 1.0510563  | 0.601 |
| DCN      | MAP6      | 0.6892586   | -0.35560963 | 1.04486823 | 0.601 |
| KLF12    | DIEXF     | 0.21240428  | -0.8021883  | 1.01459258 | 0.601 |
| BID      | BCL2      | -0.6409309  | 0.41418755  | 1.05511845 | 0.6   |
| NAB2     | AIDA      | 0.6567966   | -0.34470737 | 1.00150397 | 0.6   |
| SFN      | RACGAP1   | 0.6797043   | -0.48782387 | 1.16752817 | 0.599 |
| RELB     | C1QBP     | 0.4056167   | -0.71522164 | 1.12083834 | 0.599 |
| CYBRD1   | GSTM5     | 0.7474644   | -0.3110563  | 1.0585207  | 0.599 |
| CSK      | DDB2      | -0.33645743 | 0.71927327  | 1.0557307  | 0.599 |
| SERBP1   | KLF12     | 0.39778247  | -0.6678063  | 1.06558877 | 0.598 |
| UBC      | NUP62     | -0.48331717 | 0.5552413   | 1.03855847 | 0.598 |
| RPN2     | AUP1      | -0.26980424 | 0.7427143   | 1.01251854 | 0.598 |
| UBC      | TEC       | 0.75500816  | -0.5243374  | 1.27934556 | 0.597 |
| ADAM10   | ABI2      | 0.55411416  | -0.44971368 | 1.00382784 | 0.597 |
| LTF      | SLPI      | 0.43467492  | -0.565942   | 1.00061692 | 0.597 |
| VEGFA    | POLN      | 0.37214333  | -0.73089737 | 1.1030407  | 0.596 |
| TUBB     | PFDN4     | 0.48534355  | -0.605056   | 1.09039955 | 0.596 |
| FKBP1A   | CXCL2     | 0.6416518   | -0.39799577 | 1.03964757 | 0.596 |
| PPIL2    | STX6      | -0.35221702 | 0.6710907   | 1.02330772 | 0.596 |
| ZWINT    | ZHX3      | -0.71350884 | 0.29305294  | 1.00656178 | 0.596 |
| HSPH1    | KIRREL    | -0.66973156 | 0.33522448  | 1.00495604 | 0.596 |
| LAMA1    | STK36     | -0.48783937 | 0.69827884  | 1.18611821 | 0.595 |
| ESRRG    | MID2      | -0.45287892 | 0.7001661   | 1.15304502 | 0.595 |
| UBC      | DNMT1     | -0.32775608 | 0.70042276  | 1.02817884 | 0.595 |
| SLU7     | IFT81     | 0.57286364  | -0.4429489  | 1.01581254 | 0.595 |
| FOXN3    | BID       | -0.7600835  | 0.3725654   | 1.1326489  | 0.594 |
| S100B    | NPC1      | 0.4037654   | -0.65197974 | 1.05574514 | 0.594 |
| SNRPB2   | SCARB2    | -0.42779824 | 0.613042    | 1.04084024 | 0.594 |
| PDIA4    | BCL2L1    | 0.41521782  | -0.7573309  | 1.17254872 | 0.593 |
| CSNK2A1  | MAP4      | -0.59042674 | 0.5670053   | 1.15743204 | 0.593 |
| KARS     | LMNB2     | 0.79333794  | -0.37594557 | 1.16928351 | 0.592 |
| PCNA     | WBP4      | -0.4142487  | 0.70819056  | 1.12243926 | 0.592 |
| WIPI2    | DNAJB1    | 0.72459245  | -0.37055448 | 1.09514693 | 0.592 |
| KIRREL   | LCLAT1    | -0.44309118 | 0.83655965  | 1.27965083 | 0.591 |
| OPRK1    | C5AR1     | -0.47325298 | 0.53015894  | 1.00341192 | 0.591 |
| ESRRG    | TBC1D9B   | -0.80233085 | 0.58972096  | 1.39205181 | 0.59  |
| ESRRG    | THRB      | -0.5717415  | 0.6863906   | 1.2581321  | 0.59  |
| EPS15    | NPC1      | -0.4847582  | 0.7267547   | 1.2115129  | 0.59  |
| PSMB2    | CRTAP     | -0.43968195 | 0.74788505  | 1.187567   | 0.59  |
| BUB1B    | PSMB2     | 0.754086    | -0.31043255 | 1.06451855 | 0.59  |
| KCNRG    | LONRF2    | -0.6177186  | 0.38886985  | 1.00658845 | 0.59  |
| IPO11    | ELOVL6    | -0.6548725  | 0.4017521   | 1.0566246  | 0.589 |
| NVL      | HLA-C     | -0.65263045 | 0.56034464  | 1.21297509 | 0.588 |



|          |         |             |             |            |       |
|----------|---------|-------------|-------------|------------|-------|
| COL5A1   | FCN1    | -0.34237522 | 0.8476598   | 1.19003502 | 0.587 |
| PALLD    | URI1    | -0.4685031  | 0.56289935  | 1.03140245 | 0.587 |
| TRIM27   | EGR1    | 0.5319095   | -0.4959182  | 1.0278277  | 0.587 |
| ENG      | BCAR1   | 0.5847919   | -0.4317761  | 1.016568   | 0.587 |
| CAST     | SCML2   | -0.8043349  | 0.20574313  | 1.01007803 | 0.587 |
| MAPK13   | APP     | -0.30505916 | 0.69958514  | 1.0046443  | 0.587 |
| MMP14    | CADM1   | 0.76475376  | -0.57371956 | 1.33847332 | 0.586 |
| PCNA     | HLA-C   | -0.54737633 | 0.6588227   | 1.20619903 | 0.586 |
| PCNA     | HLA-B   | -0.36643443 | 0.6853435   | 1.05177793 | 0.586 |
| ASS1     | GTF2I   | -0.30180913 | 0.7484409   | 1.05025003 | 0.586 |
| TLN2     | GALNT2  | -0.5867796  | 0.41852158  | 1.00530118 | 0.586 |
| SSRP1    | MCM4    | 0.79677445  | -0.28996253 | 1.08673698 | 0.585 |
| XPO1     | STK10   | -0.45359528 | 0.63242817  | 1.08602345 | 0.585 |
| YARS     | VAMP4   | -0.5453731  | 0.53137356  | 1.07674666 | 0.585 |
| RPS21    | NUDCD2  | 0.37932038  | -0.64150405 | 1.02082443 | 0.584 |
| MCM6     | OKI     | -0.7469317  | 0.4281812   | 1.1751129  | 0.583 |
| NDRG2    | JUND    | 0.66230136  | -0.40307567 | 1.06537703 | 0.583 |
| MOCOS    | SHMT2   | 0.696562    | -0.36385238 | 1.06041438 | 0.583 |
| RACGAP1  | ARHGEF2 | -0.72430295 | 0.33197173  | 1.05627468 | 0.583 |
| RBM10    | RELA    | -0.35043028 | 0.70381635  | 1.05424663 | 0.583 |
| PGRMC2   | COL5A1  | 0.5299159   | -0.513119   | 1.0430349  | 0.583 |
| ALDOB    | PCNA    | 0.49608478  | -0.527948   | 1.02403278 | 0.583 |
| CASP6    | CEACAM1 | -0.6031079  | 0.5189782   | 1.1220861  | 0.582 |
| PALLD    | ENG     | 0.38916737  | -0.6409297  | 1.03009707 | 0.582 |
| UBC      | RACGAP1 | -0.46169287 | 0.56786346  | 1.02955633 | 0.582 |
| ITSN1    | ESRRG   | -0.66610426 | 0.66731447  | 1.33341873 | 0.581 |
| B2M      | DHX30   | -0.6630218  | 0.63950795  | 1.30252975 | 0.581 |
| APC      | TRIM27  | -0.56901246 | 0.6068926   | 1.17590506 | 0.58  |
| EPS8     | NUDT21  | -0.5303873  | 0.55078363  | 1.08117093 | 0.58  |
| CSNK2A1  | SPTBN1  | -0.6092908  | 0.4678246   | 1.0771154  | 0.58  |
| HSP90AA1 | H2AFY   | 0.39460644  | -0.68046486 | 1.0750713  | 0.58  |
| RRM1     | FARSA   | -0.2662156  | 0.765486    | 1.0317016  | 0.58  |
| SCML2    | PER2    | -0.7892402  | 0.5836983   | 1.3729385  | 0.579 |
| CDC25B   | MDN1    | -0.39749587 | 0.6932275   | 1.09072337 | 0.579 |
| FKBP1A   | GABBR1  | -0.43757498 | 0.6334294   | 1.07100438 | 0.579 |
| MCM6     | RUFY3   | -0.7507518  | 0.5137244   | 1.2644762  | 0.578 |
| GSTP1    | RACGAP1 | -0.66346496 | 0.58140224  | 1.2448672  | 0.578 |
| XPO1     | POSTN   | -0.5100051  | 0.68519276  | 1.19519786 | 0.578 |
| ADAM10   | PFDN4   | 0.5455552   | -0.6489095  | 1.1944647  | 0.578 |
| PARK2    | KCND3   | -0.6510445  | 0.44853646  | 1.09958096 | 0.578 |
| PTTG1    | CDC37L1 | -0.77453375 | 0.22637203  | 1.00090578 | 0.578 |
| APC      | EIF2B2  | -0.53113896 | 0.4817596   | 1.01289856 | 0.577 |
| ALAD     | GALNT2  | -0.48295513 | 0.67143     | 1.15438513 | 0.576 |
| USP4     | NXF1    | -0.6068722  | 0.5157963   | 1.1226685  | 0.576 |
| MED19    | MED16   | -0.37384227 | 0.6783539   | 1.05219617 | 0.576 |
| ESRRG    | GRB14   | -0.27712205 | 0.77323735  | 1.0503594  | 0.576 |
| PELP1    | NOL9    | 0.4768944   | -0.54959106 | 1.02648546 | 0.576 |
| TRAPPC3  | ZBTB7A  | -0.5883453  | 0.48621237  | 1.07455767 | 0.575 |
| CSNK2A1  | PGRMC2  | -0.34943253 | 0.6656352   | 1.01506773 | 0.575 |
| ESRRG    | AGFG1   | -0.6163158  | 0.5793373   | 1.1956531  | 0.574 |
| PDIA4    | CLSTN1  | -0.21075134 | 0.8411412   | 1.05189254 | 0.574 |
| CBX3     | XPO5    | -0.15654816 | 0.87864614  | 1.0351943  | 0.574 |
| SYNPO    | RTN4RL1 | -0.59227926 | 0.43174714  | 1.0240264  | 0.574 |
| SP3      | RCC2    | -0.7283448  | 0.7502496   | 1.4785944  | 0.573 |
| ESRRG    | DLG1    | -0.56595933 | 0.67561066  | 1.24156999 | 0.573 |
| BCL2L1   | DNMT1   | 0.39891997  | -0.6843761  | 1.08329607 | 0.573 |

|         |           |             |             |            |       |
|---------|-----------|-------------|-------------|------------|-------|
| TRA2B   | CHD1L     | 0.37040603  | -0.83092296 | 1.20132899 | 0.572 |
| PRMT5   | PCMTD1    | -0.6645098  | 0.4055175   | 1.0700273  | 0.571 |
| HDAC1   | HDAC11    | -0.74961543 | 0.27786276  | 1.02747819 | 0.571 |
| PALLD   | LTBP4     | 0.3567859   | -0.6452331  | 1.002019   | 0.571 |
| CLIP1   | EIF4G3    | 0.6190065   | -0.6013059  | 1.2203124  | 0.57  |
| GSTM3   | URI1      | -0.6261838  | 0.5561902   | 1.182374   | 0.569 |
| SMYD3   | AACS      | -0.59811556 | 0.46663427  | 1.06474983 | 0.569 |
| OPRK1   | GPR34     | -0.69782233 | 0.6470283   | 1.34485063 | 0.567 |
| EPS15   | GAPDH     | -0.73043734 | 0.4155373   | 1.14597464 | 0.567 |
| UBC     | HDAC1     | -0.634058   | 0.5047849   | 1.1388429  | 0.567 |
| TAF1C   | RIC1      | -0.36899817 | 0.6390366   | 1.00803477 | 0.567 |
| ESRRG   | APOD      | -0.6827962  | 0.47703657  | 1.15983277 | 0.566 |
| SPPL2A  | RIN3      | 0.3932637   | -0.6911485  | 1.0844122  | 0.566 |
| EIF5    | KLF12     | 0.2871113   | -0.7812882  | 1.0683995  | 0.566 |
| GSTM5   | ZHX3      | 0.73642725  | -0.31890857 | 1.05533582 | 0.566 |
| STAT5B  | C8orf4    | -0.5565181  | 0.4750577   | 1.0315758  | 0.565 |
| GRB14   | MLST8     | 0.5475147   | -0.49806637 | 1.04558107 | 0.564 |
| CSNK2A1 | CALM1     | -0.3026342  | 0.7016945   | 1.0043287  | 0.564 |
| HDAC11  | CCT3      | -0.70223165 | 0.4053549   | 1.10758655 | 0.563 |
| SERBP1  | IRF9      | -0.5328789  | 0.5276755   | 1.0605544  | 0.562 |
| METTL3  | HIST1H2BE | -0.39994228 | 0.6269651   | 1.02690738 | 0.562 |
| BID     | ZHX3      | -0.6931899  | 0.5142995   | 1.2074894  | 0.561 |
| XRCC5   | CBX3      | -0.46476158 | 0.57459176  | 1.03935334 | 0.561 |
| PIKFYVE | ACTN3     | -0.4993772  | 0.5250647   | 1.0244419  | 0.561 |
| DLG1    | EIF4G3    | 0.7213695   | -0.49307704 | 1.21444654 | 0.56  |
| SAP30L  | STAT3     | -0.48826304 | 0.6587151   | 1.14697814 | 0.56  |
| USP9X   | STX6      | -0.46326324 | 0.67200565  | 1.13526889 | 0.56  |
| RBPJ    | BST2      | -0.532398   | 0.56374615  | 1.09614415 | 0.56  |
| PDIA4   | LRWD1     | 0.5395261   | -0.51876646 | 1.05829256 | 0.56  |
| PCNA    | RUFY3     | -0.74981827 | 0.7793764   | 1.52919467 | 0.558 |
| PCNA    | ITCH      | -0.64811224 | 0.50884974  | 1.15696198 | 0.558 |
| RSPO3   | C10orf90  | -0.8119126  | 0.37814882  | 1.19006142 | 0.557 |
| GSTP1   | ZWINT     | -0.5672679  | 0.58431834  | 1.15158624 | 0.557 |
| KARS    | ALAD      | -0.52936184 | 0.58945954  | 1.11882138 | 0.557 |
| NSMF    | MYO19     | -0.27359405 | 0.8279819   | 1.10157595 | 0.557 |
| INTS6   | LZTS1     | -0.6230984  | 0.4609288   | 1.0840272  | 0.557 |
| MYOM1   | GALNT2    | -0.7358197  | 0.33484095  | 1.07066065 | 0.557 |
| LMOD3   | DNAJC9    | 0.42174283  | -0.6138938  | 1.03563663 | 0.557 |
| DHX30   | HLA-C     | -0.34993175 | 0.8517271   | 1.20165885 | 0.556 |
| DCN     | ZNF219    | 0.62513894  | -0.39868784 | 1.02382678 | 0.556 |
| ITCH    | BID       | -0.6429665  | 0.36498407  | 1.00795057 | 0.556 |
| XRCC5   | THRB      | -0.7427294  | 0.48075923  | 1.22348863 | 0.555 |
| GNAQ    | TEC       | 0.5640928   | -0.51608664 | 1.08017944 | 0.555 |
| RPS20   | NAB2      | 0.5995236   | -0.43772703 | 1.03725063 | 0.555 |
| ZHX1    | BID       | -0.53336537 | 0.47427258  | 1.00763795 | 0.555 |
| RPL27A  | RPN2      | 0.5089794   | -0.60281783 | 1.11179723 | 0.554 |
| NFE2L1  | ARPC5L    | -0.745861   | 0.36297947  | 1.10884047 | 0.554 |
| TRIAP1  | S100A16   | 0.7716256   | -0.24383022 | 1.01545582 | 0.554 |
| SSBP2   | PEX5      | -0.55529904 | 0.668944    | 1.22424304 | 0.553 |
| PJA2    | MALT1     | -0.8521082  | 0.3259926   | 1.1781008  | 0.553 |
| ZNF385D | HINFP     | -0.55193686 | 0.5242294   | 1.07616626 | 0.553 |
| PALLD   | FOXJ2     | -0.28776047 | 0.7746882   | 1.06244867 | 0.553 |
| SNRPB2  | EPS8      | -0.44844052 | 0.58005977  | 1.02850029 | 0.553 |
| KIF13A  | GSTM5     | 0.78473055  | -0.36142126 | 1.14615181 | 0.552 |
| APC     | KANSL2    | -0.5523659  | 0.4855669   | 1.0379328  | 0.552 |
| CADM1   | RHOQ      | -0.29809403 | 0.70735776  | 1.00545179 | 0.552 |

|          |             |             |             |            |       |
|----------|-------------|-------------|-------------|------------|-------|
| CFH      | LEPR        | 0.55297995  | -0.6037897  | 1.15676965 | 0.551 |
| EPS15    | EIF2B2      | -0.4028363  | 0.73950815  | 1.14234445 | 0.551 |
| VAV2     | MOCOS       | 0.44394985  | -0.5582598  | 1.00220965 | 0.551 |
| CBS      | SERPINE2    | -0.5597397  | 0.5472537   | 1.1069934  | 0.55  |
| UBE2B    | AHCYL1      | 0.8783563   | -0.15404168 | 1.03239798 | 0.55  |
| APC      | HNRNPC      | -0.5265743  | 0.5624219   | 1.0889962  | 0.548 |
| RRBP1    | FOS         | 0.73889977  | -0.5868063  | 1.32570607 | 0.547 |
| SCRN1    | BMP1        | 0.7231019   | -0.45920885 | 1.18231075 | 0.547 |
| UBE2B    | ATP6V1G1    | -0.48814714 | 0.60152346  | 1.0896706  | 0.547 |
| KAT6B    | MAP4        | 0.56209     | -0.5251118  | 1.0872018  | 0.547 |
| HDAC11   | BID         | -0.73573256 | 0.4132407   | 1.14897326 | 0.546 |
| ADAMTS9  | TLL2        | 0.5437577   | -0.478506   | 1.0222637  | 0.546 |
| FBN1     | THBS3       | 0.67843425  | -0.3230952  | 1.00152945 | 0.545 |
| PPIL2    | AMOT        | 0.71436757  | -0.5507488  | 1.26511637 | 0.544 |
| EBF1     | SLIRP       | -0.6768384  | 0.49922705  | 1.17606545 | 0.544 |
| PIK3R1   | RPL14       | -0.3694979  | 0.7096241   | 1.079122   | 0.544 |
| GALNT2   | CST1        | 0.46672082  | -0.73749727 | 1.20421809 | 0.543 |
| DDX6     | MOCOS       | -0.75473726 | 0.37804753  | 1.13278479 | 0.543 |
| PCNA     | TK1         | 0.8228824   | -0.30838484 | 1.13126724 | 0.543 |
| KLF12    | ADARB1      | 0.34229413  | -0.7087858  | 1.05107993 | 0.543 |
| ITCH     | NUDT21      | -0.4098869  | 0.6026237   | 1.0125106  | 0.543 |
| PTPRG    | NTSR2       | 0.42506647  | -0.67199826 | 1.09706473 | 0.542 |
| KCNK3    | PDLIM4      | -0.60294104 | 0.45831183  | 1.06125287 | 0.542 |
| MCM4     | RACGAP1     | 0.82585716  | -0.20700018 | 1.03285734 | 0.542 |
| MCM4     | BST2        | 0.57062817  | -0.69127506 | 1.26190323 | 0.541 |
| FOXM1    | NDFIP2      | 0.7235189   | -0.5082417  | 1.2317606  | 0.541 |
| TRIO     | SERPINE2    | -0.6653005  | 0.460458    | 1.1257585  | 0.541 |
| ENG      | SOX30       | 0.296265    | -0.73232484 | 1.02858984 | 0.541 |
| SHMT1    | PGF         | -0.73984903 | 0.473753    | 1.21360203 | 0.54  |
| BYSL     | HDAC1       | 0.7240958   | -0.47808442 | 1.20218022 | 0.54  |
| FOXN3    | PSMA4       | -0.6483671  | 0.4646596   | 1.1130267  | 0.54  |
| FOXN3    | PSMB3       | -0.6873873  | 0.37733114  | 1.06471844 | 0.54  |
| SORL1    | SHANK2      | 0.5011979   | -0.5509091  | 1.052107   | 0.54  |
| DNAJC15  | ARHGEF12    | -0.60403    | 0.42188603  | 1.02591603 | 0.54  |
| YARS     | KLF12       | 0.33122638  | -0.68156374 | 1.01279012 | 0.54  |
| KIF5B    | IPO9        | 0.39395198  | -0.61545825 | 1.00941023 | 0.539 |
| MAPKAP1  | GET4        | -0.51234984 | 0.59840006  | 1.1107499  | 0.538 |
| CSF3R    | FGF18       | -0.63752395 | 0.45956895  | 1.0970929  | 0.538 |
| PPM1A    | PSMA4       | -0.660219   | 0.42957717  | 1.08979617 | 0.538 |
| LIMK2    | SAFB2       | -0.453538   | 0.6059376   | 1.0594756  | 0.538 |
| PPM1A    | PSMB3       | -0.62532    | 0.39023435  | 1.01555435 | 0.538 |
| RACGAP1  | KCNRG       | 0.6094859   | -0.68615985 | 1.29564575 | 0.537 |
| CSTF3    | POLN        | 0.39007404  | -0.70415616 | 1.0942302  | 0.537 |
| CHMP3    | PDHB        | -0.42775026 | 0.59885186  | 1.02660212 | 0.537 |
| URI1     | FBXO9       | 0.7017003   | -0.43823206 | 1.13993236 | 0.536 |
| ARHGEF12 | ZHX2        | -0.8713973  | 0.25804472  | 1.12944202 | 0.536 |
| CDK6     | CHURC1-FNTB | -0.47587612 | 0.58088917  | 1.05676529 | 0.536 |
| CHD2     | JDP2        | 0.33857828  | -0.7098905  | 1.04846878 | 0.536 |
| DYSF     | STK36       | -0.44145682 | 0.5694143   | 1.01087112 | 0.536 |
| RELB     | NUDT21      | 0.44620797  | -0.6092139  | 1.05542187 | 0.535 |
| NOL9     | ASB1        | -0.55212194 | 0.8078885   | 1.36001044 | 0.534 |
| APC      | XPO5        | -0.5323083  | 0.5820152   | 1.1143235  | 0.534 |
| ITSN1    | LTF         | -0.6379661  | 0.46220395  | 1.10017005 | 0.533 |
| USP4     | RAB13       | 0.75192463  | -0.397662   | 1.14958663 | 0.532 |
| CYBRD1   | PSMB3       | -0.6525976  | 0.43540448  | 1.08800208 | 0.532 |
| ESRRG    | MPL         | -0.34488168 | 0.732917    | 1.07779868 | 0.532 |

|          |           |             |             |            |       |
|----------|-----------|-------------|-------------|------------|-------|
| CTNNA1   | CELSR1    | -0.4056062  | 0.665527    | 1.0711332  | 0.532 |
| ZNF467   | ZNF668    | -0.32876667 | 0.70259833  | 1.031365   | 0.532 |
| CADM1    | KLHL17    | 0.3258665   | -0.67667055 | 1.00253705 | 0.532 |
| APC      | MAP4K4    | -0.6490401  | 0.51782197  | 1.16686207 | 0.531 |
| WNK1     | CADM1     | -0.49021128 | 0.64046866  | 1.13067994 | 0.531 |
| DDB2     | ARPC1B    | -0.35592726 | 0.80492336  | 1.16085062 | 0.53  |
| DHX30    | PARP14    | -0.41891614 | 0.6270429   | 1.04595904 | 0.53  |
| XPO1     | TBC1D1    | -0.47593957 | 0.536549    | 1.01248857 | 0.53  |
| XRCC5    | PDE4DIP   | -0.73589355 | 0.4822489   | 1.21814245 | 0.529 |
| EIF6     | DNAJC15   | -0.46461016 | 0.72606474  | 1.1906749  | 0.529 |
| ZNF385D  | LBP       | 0.7586787   | -0.40264794 | 1.16132664 | 0.529 |
| RBMS3    | RPL27A    | -0.75034046 | 0.2569855   | 1.00732596 | 0.529 |
| SET      | APOE      | -0.5876586  | 0.65531695  | 1.24297555 | 0.526 |
| CEACAM1  | ARPP19    | -0.24685712 | 0.88734627  | 1.13420339 | 0.526 |
| PRKRIR   | FZD10     | 0.5740327   | -0.5562316  | 1.1302643  | 0.526 |
| KIF5B    | PRRC2A    | 0.42077848  | -0.6658427  | 1.08662118 | 0.525 |
| CAST     | ESRRG     | -0.71303475 | 0.36917806  | 1.08221281 | 0.525 |
| PTPRG    | RANGAP1   | 0.28849638  | -0.75415957 | 1.04265595 | 0.525 |
| SH3PXD2A | USP4      | 0.56821656  | -0.53590643 | 1.10412299 | 0.524 |
| DNMT1    | PCMTD1    | -0.71268237 | 0.5099577   | 1.22264007 | 0.523 |
| NFE2L1   | MICALL1   | -0.36308724 | 0.7570519   | 1.12013914 | 0.523 |
| EIF4G3   | BRAP      | 0.48156443  | -0.57743734 | 1.05900177 | 0.523 |
| ADA      | LUC7L3    | -0.4742921  | 0.5760813   | 1.0503734  | 0.523 |
| NXF1     | MAPK13    | -0.30400467 | 0.69970286  | 1.00370753 | 0.523 |
| PTPN11   | CADM1     | -0.60741264 | 0.4453332   | 1.05274584 | 0.522 |
| PCNA     | EBF1      | -0.90139437 | 0.24223669  | 1.14363106 | 0.521 |
| TMOD3    | LAMA1     | 0.7644256   | -0.36480615 | 1.12923175 | 0.521 |
| KIF13A   | TBRG4     | -0.5868999  | 0.47588605  | 1.06278595 | 0.521 |
| PRMT1    | CBX3      | -0.19390346 | 0.82464266  | 1.01854612 | 0.521 |
| XRCC5    | ST13      | -0.5314729  | 0.602935    | 1.1344079  | 0.52  |
| IGF1R    | ELOVL5    | -0.5569788  | 0.526405    | 1.0833838  | 0.52  |
| SORL1    | WWC1      | 0.552252    | -0.4535627  | 1.0058147  | 0.52  |
| PCNA     | USP9X     | -0.36636275 | 0.6342602   | 1.00062295 | 0.52  |
| SAP30L   | XPO5      | -0.63205475 | 0.59834296  | 1.23039771 | 0.519 |
| DKC1     | IGF2R     | -0.7505311  | 0.38575688  | 1.13628798 | 0.519 |
| GPHN     | LCLAT1    | -0.60920286 | 0.45559156  | 1.06479442 | 0.519 |
| MDM1     | LMOD3     | 0.67617935  | -0.4382559  | 1.11443525 | 0.518 |
| ADAM10   | KCNE3     | 0.36800933  | -0.6861812  | 1.05419053 | 0.518 |
| CHD2     | AIDA      | 0.48558083  | -0.5502739  | 1.03585473 | 0.518 |
| CBX4     | ARHGEF2   | -0.3969752  | 0.77885234  | 1.17582754 | 0.517 |
| GEM      | LTBP4     | 0.7546099   | -0.34157214 | 1.09618204 | 0.517 |
| PIAS2    | PSMA4     | -0.41506597 | 0.636161    | 1.05122697 | 0.517 |
| GNAQ     | FUT11     | -0.3656538  | 0.67132443  | 1.03697823 | 0.517 |
| SFN      | SNU13     | 0.64818513  | -0.6103026  | 1.25848773 | 0.516 |
| COL3A1   | PRMT8     | -0.83920074 | 0.41447073  | 1.25367147 | 0.516 |
| VCAM1    | PPIL2     | -0.5320185  | 0.7362928   | 1.2683113  | 0.515 |
| KIRREL   | LRP8      | -0.7324652  | 0.27639434  | 1.00885954 | 0.515 |
| TYRO3    | TNIP1     | -0.2267862  | 0.77730703  | 1.00409323 | 0.515 |
| KIRREL   | LCMT2     | -0.6944882  | 0.69140863  | 1.38589683 | 0.514 |
| SETD7    | FZD10     | 0.27529296  | -0.778769   | 1.05406196 | 0.514 |
| CSNK2A1  | KCNQ4     | -0.6339098  | 0.5891574   | 1.2230672  | 0.513 |
| AUP1     | TEAD4     | -0.4214954  | 0.72132355  | 1.14281895 | 0.513 |
| ESRRG    | NPR3      | -0.2580772  | 0.8488113   | 1.1068885  | 0.513 |
| SOD2     | GABARAPL1 | -0.59948707 | 0.50114375  | 1.10063082 | 0.513 |
| TRIM27   | CSR2BP    | -0.37207332 | 0.706193    | 1.07826632 | 0.513 |
| MDN1     | HDAC1     | -0.5081038  | 0.5678982   | 1.076002   | 0.513 |

|          |          |             |             |            |       |
|----------|----------|-------------|-------------|------------|-------|
| SIX1     | CADM1    | -0.28597906 | 0.720879    | 1.00685806 | 0.513 |
| WWC1     | LMOD3    | -0.6587433  | 0.46138453  | 1.12012783 | 0.512 |
| GNAQ     | AGPAT5   | -0.46876568 | 0.68987596  | 1.15864164 | 0.511 |
| NEDD4L   | ARPC5L   | -0.71472716 | 0.34648997  | 1.06121713 | 0.511 |
| PPM1A    | BMP1     | 0.41559735  | -0.584458   | 1.00005535 | 0.511 |
| MVP      | FOS      | 0.53318423  | -0.67943096 | 1.21261519 | 0.509 |
| MVP      | JUN      | 0.5060352   | -0.5994051  | 1.1054403  | 0.509 |
| KIF13A   | TEC      | 0.40670556  | -0.6264632  | 1.03316876 | 0.509 |
| IPO11    | ABCA1    | -0.6168594  | 0.6731664   | 1.2900258  | 0.508 |
| KARS     | VAV2     | 0.7770853   | -0.4971271  | 1.2742124  | 0.508 |
| ESRRG    | SSFA2    | -0.58733183 | 0.64258385  | 1.22991568 | 0.508 |
| PFDN4    | USP3     | 0.60700786  | -0.56634647 | 1.17335433 | 0.508 |
| ZNF385D  | ZNF148   | -0.52181053 | 0.6176165   | 1.13942703 | 0.508 |
| HDAC1    | CASP6    | -0.6237511  | 0.46194217  | 1.08569327 | 0.508 |
| PCNA     | CDKN3    | 0.8788936   | -0.28739098 | 1.16628458 | 0.507 |
| XRCC5    | WBP4     | -0.39283657 | 0.67784417  | 1.07068074 | 0.507 |
| XRCC5    | KANK1    | -0.69177175 | 0.3609746   | 1.05274635 | 0.507 |
| GNAQ     | TRIM2    | 0.41882876  | -0.62769246 | 1.04652122 | 0.507 |
| MMS19    | JDP2     | 0.42286512  | -0.6076294  | 1.03049452 | 0.507 |
| DCUN1D5  | THRB     | -0.2646342  | 0.7620404   | 1.0266746  | 0.506 |
| PRMT8    | FBN1     | -0.75142187 | 0.27307254  | 1.02449441 | 0.506 |
| ESRRG    | CYBRD1   | -0.58438814 | 0.6679339   | 1.25232204 | 0.505 |
| B2M      | MED14    | -0.4739867  | 0.6733753   | 1.147362   | 0.505 |
| OLMALINC | SERPINE2 | -0.5921834  | 0.4390673   | 1.0312507  | 0.505 |
| KLF12    | XPO5     | 0.2296844   | -0.7757916  | 1.005476   | 0.505 |
| RAB35    | AHI1     | 0.6014385   | -0.58553165 | 1.18697015 | 0.504 |
| STAT3    | CLSTN1   | -0.20614776 | 0.80432075  | 1.01046851 | 0.504 |
| DCN      | LTBP4    | 0.9358703   | -0.25856522 | 1.19443552 | 0.503 |
| DIAPH1   | SOX4     | -0.622739   | 0.5522068   | 1.1749458  | 0.503 |
| PELP1    | PHF8     | 0.6664695   | -0.5032513  | 1.1697208  | 0.503 |
| IPO11    | CHD2     | -0.49395874 | 0.5920686   | 1.08602734 | 0.503 |
| YARS     | AUP1     | -0.22810902 | 0.7722622   | 1.00037122 | 0.503 |
| MED14    | HLA-C    | -0.46427476 | 0.7101785   | 1.17445326 | 0.502 |
| PSMA4    | EBF1     | -0.7309841  | 0.40315396  | 1.13413806 | 0.502 |
| SMC4     | FOXO1    | 0.8803084   | -0.24588135 | 1.12618975 | 0.502 |
| XRCC5    | IGF2R    | -0.62491566 | 0.44563824  | 1.0705539  | 0.502 |
| SNRPB2   | DPP3     | 0.7793292   | -0.2426178  | 1.021947   | 0.502 |
| CCND2    | PPP2R4   | 0.78921294  | -0.5342362  | 1.32344914 | 0.501 |
| KCNAB1   | COL1A1   | 0.5467718   | -0.60329264 | 1.15006444 | 0.501 |
| KIF11    | NUSAP1   | 0.95173293  | -0.11290682 | 1.06463975 | 0.501 |
| UBE2B    | MAP4     | 0.56445485  | -0.45064545 | 1.0151003  | 0.501 |
| TK1      | DDAH2    | -0.7263438  | 0.52926314  | 1.25560694 | 0.5   |
| COL4A1   | VLDLR    | -0.2917448  | 0.7305824   | 1.0223272  | 0.5   |
