# Supplementary material for: Identification of key regulatory genes connected to NF-κB family of proteins in visceral adipose tissues using gene expression and weighted protein interaction network
Source: PubMed Central journal article supplement (PMC6478283; doi:10.1371/journal.pone.0214337), 2019-04-23
Supplement: pone.0214337.s007.pdf [file pone.0214337.s007.pdf]

**S7 Table:** List of genes involved in obesity or obesity related disorders with their fold change and statistical significance. The bold colored gene represents the target genes of NF- $\kappa$ B proteins.

| Gene                   | FC        | P value  | PubMed                                                      |
|------------------------|-----------|----------|-------------------------------------------------------------|
| <i>ELOVL6</i>          | -3.57931  | 0.004858 | 17906635, 20228221, 19259639, 26628376                      |
| <b><i>VEGFA</i></b>    | -1.54068  | 0.039188 | 27819131, 27819131, 23805408, 18713823, 22451920            |
| <b><i>JUNB</i></b>     | 2.429319  | 0.013038 | 24925581, 24186979, 16306344, 24186979, 24411941, 22169755  |
| <i>NGFR</i>            | -1.53768  | 0.019127 | 26278479, 25896784, 24608438,                               |
| <i>PGRMC2</i>          | 1.573806  | 0.015074 | 28388727                                                    |
| <b><i>PIK3R1</i></b>   | 1.79652   | 0.012608 | 22698915, 27766312, 15331535, 28478612, 23991359, 17016694  |
| <i>PTPN11</i>          | 1.66582   | 0.001426 | 15520383, 22431513                                          |
| <i>SPTBN1</i>          | 1.69658   | 0.002139 | 29115457, 29145611                                          |
| <b><i>FOS</i></b>      | 5.645199  | 0.005852 | 10435786, 28527681, 10856820                                |
| <i>ABCA1</i>           | -1.50857  | 0.01755  | 21289254, 24443560, 29348118, 17135600, 26891315,           |
| <i>AHNAK</i>           | 1.612503  | 0.013673 | 30154465, 26466345, 26987950                                |
| <b><i>STAT1</i></b>    | -1.85297  | 0.026271 | 22969086, 23735217, 26972840                                |
| <i>ABCG1</i>           | -2.17004  | 0.000164 | 26451289, 25249572, 22179025, 25249572                      |
| <b><i>MITF</i></b>     | 1.988386  | 0.000116 | 24789918, 24477476, 28380427                                |
| <b><i>IRF1</i></b>     | -1.62929  | 0.032121 | 28416283, 22874466, 21187013                                |
| <b><i>HSP90AA1</i></b> | 1.608236  | 0.007092 | 23261432, 24096869                                          |
| <i>YME1L1</i>          | -1.94133  | 0.019475 | 29579150,                                                   |
| <b><i>JUND</i></b>     | 1.999995  | 0.001439 | 24186979, 24411941, 22169755                                |
| <i>SP3</i>             | -1.60374  | 0.027501 | 12378384, 18664368                                          |
| <i>PALLD</i>           | 1.580293  | 0.016407 | 21602305, 24549139, 21602305                                |
| <i>AGPAT5</i>          | -1.59866  | 0.004458 | 25651185, 16436371, 25415055                                |
| <b><i>CD69</i></b>     | 2.332444  | 0.003264 | 29888230, 27609769, 21911743, 29888230, 29560551, 22024641  |
| <i>DDX39A</i>          | -1.50852  | 0.001805 | 29441128                                                    |
| <i>CALM1</i>           | 1.72647   | 0.002641 | 28246289                                                    |
| <i>NEDD4L</i>          | 1.925482  | 0.001355 | 23549273, 28017963, 21154329, 20003179                      |
| <b><i>PTX3</i></b>     | -2.57139  | 0.047881 | 24415446, 28770376, 28400677, 30105036, 24215445, 25467846, |
| <b><i>EZH2</i></b>     | -1.60725  | 0.020643 | 26725766, 28440716                                          |
| <i>SORL1</i>           | 2.453291  | 0.001113 | 9122234, 26869351, 27151441                                 |
| <i>KLF4</i>            | 2.919027  | 0.000531 | 27322061, 27832290                                          |
| <b><i>TXNIP</i></b>    | 1.755448  | 0.028682 | 29864940, 24928509, 21670502, 27881420, 30240435, 27777310  |
| <b><i>ERG1</i></b>     | 3.7059453 | 0.002368 | 21119640, 26696635, 21508227, 24482226, 19875615, 29339473  |
| <b><i>TNC</i></b>      | -3.07138  | 0.003811 | 23502673, 19229250, 29607419                                |
| <b><i>BCL2</i></b>     | 1.615368  | 0.013141 | 26603137, 22851489, 27612200, 29449623                      |
| <b><i>COL1A1</i></b>   | -1.58716  | 0.014842 | 23193206, 29100331, 29348885, 26900794, 28280903, 27416945, |
| <b><i>VCAMI</i></b>    | -2.07178  | 0.009974 | 28607631                                                    |
| <b><i>JUN</i></b>      | 3.955379  | 0.000236 | 21775118, 20107860                                          |
| <b><i>TEAD4</i></b>    | -1.55101  | 0.009679 | 27853845, 19249917, 10523328, 28297678                      |
| <b><i>HSPA1A</i></b>   | 2.238211  | 0.00024  | 23967297, 21182758, 26608096                                |
| <b><i>IGF1R</i></b>    | -1.52481  | 0.024148 | 29666371, 21187013                                          |
| <b><i>TGM2</i></b>     | -1.98368  | 0.003705 | 25720752, 25379403, 24599575, 25720752, 18223156            |
|                        |           |          | 29150385, 29430464, 26237614, 28402847, 28244645            |
|                        |           |          | 26313919, 21900603                                          |
